# Supplementary material for: Whole-Transcriptome Analysis Highlights Adenylyl Cyclase Toxins-Derived Modulation of NF-κB and ERK1/2 Pathways in Macrophages
Source: Toxins (Basel). 2023 Feb 9;15(2):139. doi: 10.3390/toxins15020139 (PMC9967024; doi:10.3390/toxins15020139)
Supplement: Supplementary file 1 [file toxins-15-00139-s001.zip › Supplemental Table 1.csv]

ID	Description	GeneRatio	BgRatio	pvalue	p.adjust	qvalue	geneID	Count
GO:0001819	positive regulation of cytokine production	48/679	347/13456	1.68441065735665e-10	6.34948799791044e-07	4.85711458169636e-07	20302/18106/68279/12522/16956/14991/20303/171285/58185/15251/16364/20963/12759/56620/83433/16994/21926/12511/54123/16193/16177/16176/19260/24088/18578/23845/16190/16168/19883/19225/20296/107607/13653/21825/73845/17196/257630/69573/213208/12772/12475/12051/245126/257632/19204/18413/15040/232801	48
GO:0006954	inflammatory response	60/679	499/13456	2.7897574683262e-10	6.34948799791044e-07	4.85711458169636e-07	16950/20302/19015/15162/16956/109934/20305/20303/19216/171285/15251/20963/17079/12053/57781/83433/21926/12511/16889/18569/16193/16177/18128/12156/16176/14013/24088/26970/16797/16190/19883/23959/19225/15945/20293/20306/20296/21817/21825/73845/257630/19222/54199/213208/13024/242864/12772/268857/12766/12475/104759/12702/245126/257632/19204/20310/18413/15040/232801/14728	60
GO:0042110	T cell activation	49/679	381/13456	1.37492100607377e-09	2.08621347321594e-06	1.59587322389195e-06	16950/14025/15170/18106/15216/12522/14991/171285/58185/16364/20963/12053/15205/15001/12507/12511/16193/16176/19260/15505/16797/16190/16168/19171/19883/19374/13655/20296/12142/13653/12393/74732/12571/213208/13024/12772/268857/321019/76088/12051/245126/330817/15040/20668/16658/12519/319817/67122/14728	49
GO:0060326	cell chemotaxis	33/679	204/13456	2.52415873955555e-09	2.87249264561422e-06	2.1973466080131e-06	18591/20302/17295/20305/20303/20963/20583/15370/22339/18186/18128/16176/18578/20750/19277/140571/12927/13655/15945/21983/20293/20306/20296/68667/21825/54199/12772/12766/321019/257632/20310/19229/252837	33
GO:0009617	response to bacterium	54/679	454/13456	3.36798488656556e-09	3.06621344072929e-06	2.34553557994924e-06	14038/19015/15162/11303/16956/14991/109934/19216/171285/22169/20963/17079/78416/21425/83433/14229/21926/12511/18569/16193/50778/12156/16176/14013/19260/24088/18578/236573/235527/19225/19374/76074/15945/20293/20296/242248/107607/12142/257630/19222/17476/268857/12475/12051/257632/19204/20310/387217/15040/100034251/11727/12519/387174/14728	54
GO:0050865	regulation of cell activation	53/679	451/13456	7.21783732469882e-09	5.18841714523762e-06	3.96893994922904e-06	18591/16950/15170/18106/15216/12522/14991/109934/11622/56193/171285/20963/12053/15205/83433/15001/21926/12507/12511/16193/227059/16176/19260/21682/15505/16797/16190/16168/72828/19883/13655/20296/242248/12142/384783/21825/213208/13024/12772/321019/76088/68891/245126/257632/19204/330817/15040/20668/232801/12519/319817/67122/14728	53
GO:0042330	taxis	48/679	389/13456	7.97867311438123e-09	5.18841714523762e-06	3.96893994922904e-06	18591/20302/17295/18612/16985/20305/20303/14026/20963/20583/15370/22339/83433/18186/18187/16782/18128/14725/16176/18578/11787/20750/19277/18705/140571/12927/58235/13655/14764/15945/21983/20293/20306/20296/68667/21825/54199/12772/12766/321019/216856/257632/19204/20310/19229/211323/12168/252837	48
GO:0006935	chemotaxis	47/679	385/13456	1.61274241021924e-08	9.1765043141475e-06	7.01967354342798e-06	18591/20302/17295/18612/16985/20305/20303/14026/20963/20583/15370/22339/83433/18186/18187/16782/18128/14725/16176/18578/11787/20750/19277/18705/140571/12927/58235/13655/14764/15945/21983/20293/20306/20296/68667/21825/54199/12772/12766/321019/257632/19204/20310/19229/211323/12168/252837	47
GO:0050731	positive regulation of peptidyl-tyrosine phosphorylation	24/679	131/13456	3.32769963289169e-08	1.67482637105436e-05	1.28117788258437e-05	18591/16156/22612/17311/20963/15205/22339/83433/21926/16193/18186/98878/21682/11839/15505/16168/242248/12985/257632/18413/19229/211323/232801/12519	24
GO:0007159	leukocyte cell-cell adhesion	36/679	261/13456	3.67931979581363e-08	1.67482637105436e-05	1.28117788258437e-05	16950/54446/15170/18106/15216/12522/14991/171285/20963/12053/15205/21926/12507/12511/16193/16176/19260/15505/16190/16168/23959/13655/20296/21825/213208/12772/76088/68891/245126/19204/330817/15040/20668/12519/319817/67122	36
GO:0046631	alpha-beta T cell activation	24/679	133/13456	4.51020971021318e-08	1.86640678189913e-05	1.42772954271629e-05	16950/18106/15216/12522/14991/58185/16364/20963/12053/16193/19260/15505/16190/16168/19883/12142/12772/321019/12051/245126/15040/12519/319817/14728	24
GO:0050863	regulation of T cell activation	34/679	241/13456	5.04171901180479e-08	1.91249207847795e-05	1.46298302553072e-05	16950/15170/18106/15216/12522/14991/171285/20963/12053/15205/15001/12507/12511/16193/16176/19260/15505/16797/16190/16168/13655/20296/12142/213208/13024/12772/76088/245126/330817/15040/20668/12519/319817/67122	34
GO:0050867	positive regulation of cell activation	36/679	265/13456	5.46528030774021e-08	1.91368892006411e-05	1.46389856340118e-05	18591/18106/12522/14991/56193/171285/20963/12053/15205/83433/21926/12507/12511/16193/227059/16176/19260/15505/16190/16168/13655/20296/12142/384783/21825/12772/321019/76088/68891/257632/19204/330817/15040/20668/232801/12519	36
GO:0071216	cellular response to biotic stimulus	30/679	198/13456	6.20360589915683e-08	2.01705814664013e-05	1.5429720537151e-05	19015/12122/11303/171285/22169/20963/17079/83433/21926/12511/18569/16193/12125/16176/19260/24088/18578/235527/15945/20293/20296/12142/56338/12475/257632/20310/387217/12519/387174/14728	30
GO:0071396	cellular response to lipid	45/679	378/13456	6.98166854912909e-08	2.11870368237571e-05	1.62072698670309e-05	19015/83383/22612/11303/16956/11622/74747/15468/171285/22169/17079/12759/67731/20583/83433/21926/12511/18569/16193/16176/19260/18578/20750/19883/235527/15945/20293/20296/12142/235283/16323/77128/12475/104263/257632/15364/20310/19229/224829/723827/387217/12519/243866/387174/14728	45
GO:0002694	regulation of leukocyte activation	48/679	418/13456	7.80028070563243e-08	2.14495968455907e-05	1.64081182048872e-05	16950/15170/18106/15216/12522/14991/109934/11622/171285/20963/12053/15205/83433/15001/21926/12507/12511/16193/227059/16176/19260/15505/16797/16190/16168/19883/13655/20296/242248/12142/384783/21825/213208/13024/12772/321019/76088/68891/245126/257632/19204/330817/15040/20668/12519/319817/67122/14728	48
GO:1903037	regulation of leukocyte cell-cell adhesion	33/679	234/13456	8.01061393618281e-08	2.14495968455907e-05	1.64081182048872e-05	16950/54446/15170/18106/15216/12522/14991/171285/20963/12053/15205/21926/12507/12511/16193/16176/19260/15505/16190/16168/13655/20296/213208/12772/76088/245126/19204/330817/15040/20668/12519/319817/67122	33
GO:0007186	G protein-coupled receptor signaling pathway	51/679	461/13456	1.00910950518591e-07	2.55192581533681e-05	1.95212528839473e-05	20302/26556/14686/17295/11303/20305/20303/19216/56193/19739/20963/110197/16004/54393/64214/50778/19735/29815/18578/11839/12927/244585/67168/14764/15945/20293/20306/20296/74191/21817/227120/17201/18821/19222/54199/208990/73010/14362/12495/12772/12766/321019/19204/19229/80910/110789/227333/105171/252837/100503710/620246	51
GO:0050900	leukocyte migration	34/679	249/13456	1.13207465900694e-07	2.71221255147347e-05	2.07473848863987e-05	18591/20302/68279/109934/20305/20303/17311/20963/57781/22339/83433/21926/16177/16176/19260/24088/18578/20750/19277/15945/20293/20306/20296/68667/21825/12772/12766/321019/76088/68891/257632/19204/20310/19229	34
GO:0002237	response to molecule of bacterial origin	33/679	238/13456	1.20617617144073e-07	2.7158871668275e-05	2.07754942832887e-05	19015/11303/14991/109934/19216/171285/22169/17079/83433/21926/12511/18569/16193/16176/19260/24088/18578/235527/19225/15945/20293/20296/12142/19222/268857/12475/257632/19204/20310/387217/12519/387174/14728	33
GO:0003151	outflow tract morphogenesis	14/679	51/13456	1.37982760912069e-07	2.7158871668275e-05	2.07754942832887e-05	21385/15251/15205/22339/18186/18187/18128/14725/20190/17684/21825/14362/20148/12168	14
GO:0032602	chemokine production	17/679	75/13456	1.38877693132591e-07	2.7158871668275e-05	2.07754942832887e-05	68279/16956/171285/20963/20583/83433/21926/16193/16176/24088/16190/13653/17196/257630/12766/257632/14728	17
GO:0061061	muscle structure development	51/679	467/13456	1.52096328650392e-07	2.7158871668275e-05	2.07754942832887e-05	21385/18591/19015/13549/26556/17295/67220/71371/12227/14281/17869/15205/17069/107589/20273/15370/22339/74116/17691/13819/21926/18569/16193/19735/11910/18128/14725/12156/21916/16656/79362/20190/16190/60406/19883/14733/15945/12226/13653/17684/223701/235542/14362/242620/12180/110196/210719/21957/211323/78321/667118	51
GO:0050730	regulation of peptidyl-tyrosine phosphorylation	28/679	184/13456	1.55596742024294e-07	2.7158871668275e-05	2.07754942832887e-05	18591/15170/16156/22612/17311/15468/20963/15205/22339/83433/21926/16193/18186/98878/19260/21682/11839/15505/16168/242248/12985/12702/257632/18413/19229/211323/232801/12519	28
GO:0002521	leukocyte differentiation	49/679	441/13456	1.58590970413186e-07	2.7158871668275e-05	2.07754942832887e-05	16950/14025/20302/15170/12522/14991/11622/17311/58185/14281/16364/20963/17869/12053/22339/83433/15001/21926/16193/80752/381319/215653/16176/19260/24088/16190/16168/72828/19883/19374/13655/17342/12985/12142/20130/13653/12393/17684/12571/13024/12772/321019/12051/18733/19229/20668/16658/319817/67122	49
GO:0070661	leukocyte proliferation	33/679	241/13456	1.62795237910216e-07	2.7158871668275e-05	2.07754942832887e-05	15170/18106/14991/11622/17311/171285/20963/17079/12759/12053/15205/83433/12511/16193/227059/16176/19260/16168/19171/19374/20293/12142/384783/213208/12772/321019/76088/245126/330817/15040/12519/319817/14728	33
GO:0071706	tumor necrosis factor superfamily cytokine production	24/679	142/13456	1.63864956986713e-07	2.7158871668275e-05	2.07754942832887e-05	20302/15170/16956/20303/171285/20963/12759/83433/16193/19260/24088/217203/20296/107607/21825/257630/12772/268857/12475/12051/257632/19204/15040/232801	24
GO:0048247	lymphocyte chemotaxis	11/679	31/13456	1.67058085832974e-07	2.7158871668275e-05	2.07754942832887e-05	20302/20305/20303/15945/20293/20306/20296/12772/12766/321019/19229	11
GO:0032496	response to lipopolysaccharide	31/679	221/13456	2.24031415344946e-07	3.42804274814017e-05	2.62232111063909e-05	19015/11303/109934/19216/171285/22169/17079/83433/21926/12511/18569/16193/16176/19260/18578/235527/19225/15945/20293/20296/12142/19222/268857/12475/257632/19204/20310/387217/12519/387174/14728	31
GO:0043408	regulation of MAPK cascade	53/679	500/13456	2.25925488673561e-07	3.42804274814017e-05	2.62232111063909e-05	18591/20302/15170/16156/17295/17873/20305/20303/17311/171285/20963/93834/16012/22339/83433/21926/16193/18186/19735/11910/18128/215653/12156/16176/14013/19260/24088/29815/83379/15505/75590/319520/240672/217203/21983/20293/20306/20296/79201/242248/107607/20130/21825/213452/15901/59036/321019/235584/257632/18413/19229/330177/232801	53
GO:1903039	positive regulation of leukocyte cell-cell adhesion	26/679	166/13456	2.41381299250975e-07	3.42983632979723e-05	2.62369313175683e-05	54446/18106/12522/14991/171285/20963/12053/15205/21926/12507/12511/16193/16176/19260/15505/16190/16168/13655/20296/12772/76088/19204/330817/15040/20668/12519	26
GO:0022407	regulation of cell-cell adhesion	39/679	318/13456	2.44217676809845e-07	3.42983632979723e-05	2.62369313175683e-05	16950/54446/15170/18106/15216/12522/14991/171285/20963/12053/15205/22339/21926/12507/12511/16193/18128/12156/16176/19260/15505/16190/16168/72828/13655/20296/17684/17196/213208/12772/76088/245126/19204/330817/15040/20668/12519/319817/67122	39
GO:0007169	transmembrane receptor protein tyrosine kinase signaling pathway	47/679	421/13456	2.48648064330643e-07	3.42983632979723e-05	2.62369313175683e-05	18591/15162/17295/22612/71371/74747/15251/20963/16012/22339/18186/80752/18187/18128/19262/215653/12156/16176/29815/83379/11839/22241/16797/12927/75747/72828/12509/243659/14733/99929/271849/20296/56338/384783/12393/215114/21825/213452/217692/19222/225608/12702/77531/19229/17060/211323/227333	47
GO:0018108	peptidyl-tyrosine phosphorylation	31/679	224/13456	3.03992966491189e-07	4.06992936314087e-05	3.11333973112339e-05	18591/15162/15170/16156/22612/17311/15468/20963/15205/22339/83433/21926/11302/16193/18186/12747/98878/19260/21682/11839/15505/16168/242248/12985/12702/257632/18413/19229/211323/232801/12519	31
GO:0048514	blood vessel morphogenesis	49/679	454/13456	3.83311677849276e-07	4.89041671141971e-05	3.7409810566498e-05	21385/18591/57875/26360/14991/11622/15251/20963/20620/18792/15205/107589/11504/15370/22339/13819/21926/18186/18187/18128/14725/16176/18576/19883/19225/12509/13655/99929/15945/20293/20296/12226/226841/12142/20130/17684/21825/257630/15901/12772/12766/16598/15364/19229/239027/387217/12168/11727/67122	49
GO:0032733	positive regulation of interleukin-10 production	10/679	27/13456	3.86764063293299e-07	4.89041671141971e-05	3.7409810566498e-05	12522/16364/20963/83433/16193/24088/213208/12051/257632/232801	10
GO:0018212	peptidyl-tyrosine modification	31/679	227/13456	4.09857174187012e-07	4.94035642930281e-05	3.779183023803e-05	18591/15162/15170/16156/22612/17311/15468/20963/15205/22339/83433/21926/11302/16193/18186/12747/98878/19260/21682/11839/15505/16168/242248/12985/12702/257632/18413/19229/211323/232801/12519	31
GO:0097529	myeloid leukocyte migration	24/679	149/13456	4.12419912815261e-07	4.94035642930281e-05	3.779183023803e-05	18591/20302/68279/20305/20303/20963/57781/22339/83433/16177/16176/18578/20750/19277/15945/20293/20306/20296/21825/12772/68891/257632/20310/19229	24
GO:0032640	tumor necrosis factor production	23/679	139/13456	4.38347908594904e-07	5.01414470357552e-05	3.83562822112382e-05	20302/15170/16956/20303/171285/20963/12759/83433/16193/19260/24088/217203/20296/107607/21825/12772/268857/12475/12051/257632/19204/15040/232801	23
GO:2000379	positive regulation of reactive oxygen species metabolic process	18/679	90/13456	4.46946581645205e-07	5.01414470357552e-05	3.83562822112382e-05	18591/51793/14991/20963/18792/12759/21926/16193/16176/24088/19225/217203/21825/68891/16598/19229/22654/53881	18
GO:0002250	adaptive immune response	38/679	313/13456	4.51625511525915e-07	5.01414470357552e-05	3.83562822112382e-05	16950/15170/18106/15216/68279/14991/171285/58185/16364/20963/12053/56620/22339/21425/21926/54123/16193/16177/16176/21682/22256/16797/16190/19883/12142/68667/74732/257630/213208/12772/321019/12051/245126/257632/18733/19229/15040/319817	38
GO:0002696	positive regulation of leukocyte activation	33/679	253/13456	5.10070780031413e-07	5.52819569214998e-05	4.22885749459628e-05	18106/12522/14991/171285/20963/12053/15205/83433/21926/12507/12511/16193/227059/16176/19260/15505/16190/16168/13655/20296/12142/384783/21825/12772/321019/76088/68891/257632/19204/330817/15040/20668/12519	33
GO:0032635	interleukin-6 production	22/679	130/13456	5.22896775181072e-07	5.53540958284707e-05	4.23437584406117e-05	15170/17295/16956/171285/20963/57781/83433/21926/16193/16176/19260/24088/217203/242248/107607/17196/257630/268857/16598/257632/19204/232801	22
GO:0035767	endothelial cell chemotaxis	9/679	22/13456	5.53335132777313e-07	5.72450346455075e-05	4.37902540485012e-05	18591/17295/20583/15370/22339/18186/18128/13655/21825	9
GO:0045785	positive regulation of cell adhesion	39/679	329/13456	5.90574958218986e-07	5.97399379958405e-05	4.56987593400797e-05	18591/54446/15170/18106/12522/14991/171285/68732/20963/12053/15205/22339/21926/12507/12511/16193/18186/16176/19260/20750/15505/16190/16168/13655/13612/20296/21817/20130/17684/21825/12571/12772/76088/19204/19229/330817/15040/20668/12519	39
GO:0032675	regulation of interleukin-6 production	21/679	121/13456	6.14517215931522e-07	6.08104862373976e-05	4.65176876499194e-05	15170/17295/16956/171285/20963/57781/83433/21926/16193/16176/19260/24088/242248/107607/17196/257630/268857/16598/257632/19204/232801	21
GO:0001763	morphogenesis of a branching structure	23/679	142/13456	6.48153142119394e-07	6.15144988793811e-05	4.70562302962244e-05	18591/14025/17295/18612/11622/17869/20583/22339/21926/16193/18186/18128/12156/16176/11839/19143/22420/21817/12142/381157/12702/15364/67122	23
GO:0051249	regulation of lymphocyte activation	40/679	343/13456	6.48659039149889e-07	6.15144988793811e-05	4.70562302962244e-05	16950/15170/18106/15216/12522/14991/11622/171285/20963/12053/15205/15001/12507/12511/16193/227059/16176/19260/15505/16797/16190/16168/13655/20296/242248/12142/384783/213208/13024/12772/321019/76088/245126/257632/330817/15040/20668/12519/319817/67122	40
GO:0071219	cellular response to molecule of bacterial origin	26/679	176/13456	7.74901299238165e-07	7.19867492680026e-05	5.5067099847043e-05	19015/11303/171285/22169/17079/83433/21926/12511/18569/16193/16176/19260/24088/18578/235527/15945/20293/20296/12142/12475/257632/20310/387217/12519/387174/14728	26
GO:0070374	positive regulation of ERK1 and ERK2 cascade	23/679	144/13456	8.35556095478534e-07	7.60690269323658e-05	5.81898855545893e-05	18591/20302/20305/20303/171285/22339/83433/16193/18186/18128/12156/16176/19260/24088/21983/20293/20306/20296/107607/213452/321019/257632/19229	23
GO:0032680	regulation of tumor necrosis factor production	22/679	134/13456	8.93449565668333e-07	7.92699912927397e-05	6.06385004154063e-05	20302/15170/16956/20303/171285/20963/12759/83433/16193/19260/24088/20296/107607/21825/12772/268857/12475/12051/257632/19204/15040/232801	22
GO:0032760	positive regulation of tumor necrosis factor production	17/679	85/13456	9.31229728361595e-07	7.92699912927397e-05	6.06385004154063e-05	20302/16956/20303/171285/20963/12759/16193/24088/20296/107607/21825/12772/12475/257632/19204/15040/232801	17
GO:0070372	regulation of ERK1 and ERK2 cascade	29/679	212/13456	9.34135826957016e-07	7.92699912927397e-05	6.06385004154063e-05	18591/20302/15170/20305/20303/171285/20963/22339/83433/16193/18186/11910/18128/12156/16176/19260/24088/75590/319520/21983/20293/20306/20296/107607/20130/213452/321019/257632/19229	29
GO:0070098	chemokine-mediated signaling pathway	11/679	36/13456	9.40373358920902e-07	7.92699912927397e-05	6.06385004154063e-05	20302/20305/20303/15251/83433/15945/20293/20306/20296/20310/19229	11
GO:0071222	cellular response to lipopolysaccharide	25/679	167/13456	9.80486571310123e-07	8.11486340473396e-05	6.20755900075385e-05	19015/11303/171285/22169/17079/83433/21926/12511/18569/16193/16176/19260/18578/235527/15945/20293/20296/12142/12475/257632/20310/387217/12519/387174/14728	25
GO:1903557	positive regulation of tumor necrosis factor superfamily cytokine production	17/679	86/13456	1.10706827857594e-06	8.99888357871013e-05	6.88380049911505e-05	20302/16956/20303/171285/20963/12759/16193/24088/20296/107607/21825/12772/12475/257632/19204/15040/232801	17
GO:1903555	regulation of tumor necrosis factor superfamily cytokine production	22/679	136/13456	1.15764623859788e-06	9.08852459442979e-05	6.95237243510632e-05	20302/15170/16956/20303/171285/20963/12759/83433/16193/19260/24088/20296/107607/21825/12772/268857/12475/12051/257632/19204/15040/232801	22
GO:0070371	ERK1 and ERK2 cascade	30/679	226/13456	1.15802817767339e-06	9.08852459442979e-05	6.95237243510632e-05	18591/20302/15170/20305/20303/171285/20963/17869/22339/83433/16193/18186/11910/18128/12156/16176/19260/24088/75590/319520/21983/20293/20306/20296/107607/20130/213452/321019/257632/19229	30
GO:0050870	positive regulation of T cell activation	23/679	148/13456	1.36719112041764e-06	0.000105482270849849	8.06898880703222e-05	18106/12522/14991/171285/20963/12053/15205/12507/12511/16193/16176/19260/15505/16190/16168/13655/20296/12772/76088/330817/15040/20668/12519	23
GO:0032103	positive regulation of response to external stimulus	36/679	302/13456	1.40669641601062e-06	0.000106721368094672	8.16377498975989e-05	18591/20302/17295/16956/14991/20303/171285/17079/20583/22339/83433/21926/18569/71398/54123/16193/18186/16176/24088/19225/15945/21983/20296/21817/107607/21825/257630/242864/12772/12766/257632/18413/19229/15040/12168/232801	36
GO:0043410	positive regulation of MAPK cascade	40/679	354/13456	1.45989329947713e-06	0.000108941545888851	8.33361006845617e-05	18591/20302/16156/17295/17873/20305/20303/17311/171285/20963/93834/16012/22339/83433/21926/16193/18186/18128/215653/12156/16176/19260/24088/29815/83379/217203/21983/20293/20306/20296/242248/107607/21825/213452/321019/257632/18413/19229/330177/232801	40
GO:1990868	response to chemokine	12/679	45/13456	1.52988810450877e-06	0.000110540486535301	8.45592289008358e-05	20302/20305/20303/15251/83433/15945/20293/20306/20296/76088/20310/19229	12
GO:1990869	cellular response to chemokine	12/679	45/13456	1.52988810450877e-06	0.000110540486535301	8.45592289008358e-05	20302/20305/20303/15251/83433/15945/20293/20306/20296/76088/20310/19229	12
GO:0032722	positive regulation of chemokine production	13/679	53/13456	1.58787888415662e-06	0.000112937885635639	8.63931471840475e-05	68279/16956/171285/20963/21926/16193/16176/24088/16190/13653/17196/257630/257632	13
GO:0032642	regulation of chemokine production	15/679	70/13456	1.62176440872041e-06	0.000113573409053774	8.68792982031922e-05	68279/16956/171285/20963/20583/83433/21926/16193/16176/24088/16190/13653/17196/257630/257632	15
GO:0001776	leukocyte homeostasis	18/679	98/13456	1.66094137906118e-06	0.00011455462359828	8.76298896640252e-05	11622/17311/15251/16193/53945/12125/14013/26570/18578/16797/20296/79201/12772/321019/53374/18733/319817/14728	18
GO:0002823	negative regulation of adaptive immune response based on somatic recombination of immune receptors built from immunoglobulin superfamily domains	10/679	31/13456	1.69175651814619e-06	0.000114938442844798	8.79234966540076e-05	16950/15170/15216/14991/171285/12053/16190/213208/257632/319817	10
GO:0022409	positive regulation of cell-cell adhesion	27/679	196/13456	1.92604958398389e-06	0.000128932025092569	9.86280499043144e-05	54446/18106/12522/14991/171285/20963/12053/15205/21926/12507/12511/16193/16176/19260/15505/16190/16168/13655/20296/17684/12772/76088/19204/330817/15040/20668/12519	27
GO:0048871	multicellular organismal homeostasis	40/679	360/13456	2.23077722918685e-06	0.000146400674540931	0.000111990896166266	15216/26556/17295/53422/14245/16364/20963/22339/13819/21926/16889/16193/53945/18128/269346/16176/11832/73094/20750/70461/16190/16168/72828/19225/353047/227120/13653/17201/279561/17196/15901/213208/242864/12772/104263/257632/19229/110789/105171/381417	40
GO:0006959	humoral immune response	19/679	110/13456	2.25811597738782e-06	0.000146400674540931	0.000111990896166266	14038/15170/78416/21425/21926/18128/16176/12509/15945/20296/257630/12772/321019/12051/257632/20310/15040/100034251/11727	19
GO:1904407	positive regulation of nitric oxide metabolic process	11/679	39/13456	2.28349031028253e-06	0.000146400674540931	0.000111990896166266	51793/14991/12759/21926/16193/16176/24088/19225/217203/16598/19229	11
GO:0030217	T cell differentiation	29/679	222/13456	2.42145807527307e-06	0.000153089960536709	0.000117107943172563	16950/14025/12522/14991/58185/16364/20963/12053/15001/16193/16176/19260/16190/16168/19883/19374/13655/12142/13653/12393/12571/13024/12772/321019/12051/20668/16658/319817/67122	29
GO:0032653	regulation of interleukin-10 production	11/679	40/13456	3.0073881117064e-06	0.000187529187458734	0.000143452629755224	12522/16364/20963/83433/16193/24088/21942/213208/12051/257632/232801	11
GO:0046651	lymphocyte proliferation	29/679	225/13456	3.17946501418631e-06	0.000195580064115893	0.000149611241350332	15170/18106/14991/11622/171285/20963/17079/12053/15205/12511/16193/227059/16176/19260/16168/19171/19374/12142/384783/213208/12772/321019/76088/245126/330817/15040/12519/319817/14728	29
GO:0032943	mononuclear cell proliferation	29/679	226/13456	3.4770369342821e-06	0.000211032961664695	0.000161432114787441	15170/18106/14991/11622/171285/20963/17079/12053/15205/12511/16193/227059/16176/19260/16168/19171/19374/12142/384783/213208/12772/321019/76088/245126/330817/15040/12519/319817/14728	29
GO:0070663	regulation of leukocyte proliferation	25/679	179/13456	3.57931943176305e-06	0.000214382395439282	0.000163994303050861	15170/18106/14991/11622/17311/171285/20963/12053/15205/12511/16193/227059/16176/19260/16168/20293/12142/384783/213208/12772/321019/245126/330817/15040/12519	25
GO:1990266	neutrophil migration	16/679	84/13456	3.80991787651532e-06	0.000220890418085045	0.000168972690552523	20302/68279/20305/20303/20963/16177/16176/18578/20750/15945/20293/20306/20296/68891/257632/20310	16
GO:0051251	positive regulation of lymphocyte activation	28/679	215/13456	3.82718127004689e-06	0.000220890418085045	0.000168972690552523	18106/12522/14991/171285/20963/12053/15205/12507/12511/16193/227059/16176/19260/15505/16190/16168/13655/20296/12142/384783/12772/321019/76088/257632/330817/15040/20668/12519	28
GO:0035914	skeletal muscle cell differentiation	13/679	57/13456	3.83355514690654e-06	0.000220890418085045	0.000168972690552523	12227/14281/17869/15370/11910/18128/16656/60406/14733/13653/17684/242620/12180	13
GO:0001649	osteoblast differentiation	21/679	137/13456	4.88997851582799e-06	0.000278239777550613	0.000212842749083671	11622/20583/22339/21926/54393/16193/80752/18128/215653/12156/20750/11839/23845/22057/68667/12393/12571/15901/14362/12168/12096	21
GO:1903428	positive regulation of reactive oxygen species biosynthetic process	12/679	50/13456	5.11921128472827e-06	0.000287687034173865	0.000220069537750242	51793/14991/12759/21926/16193/16176/24088/19225/16598/19229/22654/53881	12
GO:0046634	regulation of alpha-beta T cell activation	16/679	86/13456	5.24781039162598e-06	0.000289200920669769	0.000221227602806307	16950/18106/15216/12522/20963/12053/16193/19260/15505/16190/12142/12772/245126/15040/12519/319817	16
GO:0070665	positive regulation of leukocyte proliferation	18/679	106/13456	5.33674809671805e-06	0.000289200920669769	0.000221227602806307	18106/17311/171285/20963/12053/15205/12511/16193/227059/16176/19260/16168/384783/12772/321019/330817/15040/12519	18
GO:0097530	granulocyte migration	18/679	106/13456	5.33674809671805e-06	0.000289200920669769	0.000221227602806307	20302/68279/20305/20303/20963/22339/16177/16176/18578/20750/15945/20293/20306/20296/21825/68891/257632/20310	18
GO:0050678	regulation of epithelial cell proliferation	31/679	256/13456	5.46988327887701e-06	0.000292928337475861	0.000224078933579259	18591/18140/19015/12576/18612/18792/17869/15205/20583/15370/22339/21926/16193/18128/12156/140571/13655/20293/20296/226841/21825/12571/15901/268857/12766/257632/15364/12168/12443/11727/67122	31
GO:0048872	homeostasis of number of cells	33/679	282/13456	5.76206818802713e-06	0.000302054605593538	0.000231060178360796	11622/17311/15251/12053/22339/13819/16889/16193/53945/18128/215653/12125/14013/26570/18578/16797/208638/16909/20296/79201/17684/12571/16323/213208/242864/12772/321019/16598/53374/18733/16658/319817/14728	33
GO:0002718	regulation of cytokine production involved in immune response	13/679	59/13456	5.77301201376051e-06	0.000302054605593538	0.000231060178360796	15216/14991/58185/12053/21926/16193/16177/16176/24088/68667/12772/257632/15040	13
GO:0050671	positive regulation of lymphocyte proliferation	17/679	97/13456	6.25103742465023e-06	0.000323349117693271	0.000247349662688313	18106/171285/20963/12053/15205/12511/16193/227059/16176/19260/16168/384783/12772/321019/330817/15040/12519	17
GO:0019221	cytokine-mediated signaling pathway	31/679	258/13456	6.42386009289756e-06	0.000328555181380558	0.000251332101564815	18591/20302/15170/20305/20303/15468/15251/20963/50873/83433/21926/54123/16193/16177/16176/16168/15945/20293/20306/20296/13653/257630/213208/77128/12772/20310/18413/18733/19229/12983/12984	31
GO:0032613	interleukin-10 production	11/679	43/13456	6.51455467684543e-06	0.000329491698766671	0.00025204850141526	12522/16364/20963/83433/16193/24088/21942/213208/12051/257632/232801	11
GO:1903530	regulation of secretion by cell	45/679	445/13456	6.62923135954429e-06	0.000331607265369732	0.000253666828656709	13121/19015/16156/15216/19157/109934/58185/15251/20963/50873/83433/11307/21926/54393/16193/18128/12156/16176/20912/24088/20750/18576/16190/75767/17920/100503659/235442/68667/384783/19726/16323/12495/12772/17386/216856/68891/16534/27062/19204/15364/18413/18111/11727/667118/99889	45
GO:0030595	leukocyte chemotaxis	22/679	151/13456	6.83319010875213e-06	0.000338094362772171	0.000258629209150481	18591/20302/20305/20303/20963/22339/16176/18578/20750/19277/15945/20293/20306/20296/68667/21825/12772/12766/321019/257632/20310/19229	22
GO:1903131	mononuclear cell differentiation	37/679	337/13456	7.05959701657733e-06	0.000345540705585592	0.000264325375561266	16950/14025/15170/12522/14991/11622/58185/16364/20963/17869/12053/22339/83433/15001/16193/381319/16176/19260/16190/16168/19883/19374/13655/12142/13653/12393/12571/13024/12772/321019/12051/18733/19229/20668/16658/319817/67122	37
GO:0032946	positive regulation of mononuclear cell proliferation	17/679	98/13456	7.21439091569983e-06	0.000349360717534741	0.000267247538064222	18106/171285/20963/12053/15205/12511/16193/227059/16176/19260/16168/384783/12772/321019/330817/15040/12519	17
GO:0002548	monocyte chemotaxis	10/679	36/13456	7.7075315678478e-06	0.00036546545517545	0.000279567044149567	18591/20302/20305/20303/19277/15945/20293/20306/20296/12772	10
GO:0002820	negative regulation of adaptive immune response	10/679	36/13456	7.7075315678478e-06	0.00036546545517545	0.000279567044149567	16950/15170/15216/14991/171285/12053/16190/213208/257632/319817	10
GO:0061138	morphogenesis of a branching epithelium	20/679	131/13456	8.70904196520723e-06	0.00040869648480024	0.000312637122310424	18591/17295/18612/11622/17869/20583/22339/21926/16193/18186/18128/12156/11839/19143/22420/21817/381157/12702/15364/67122	20
GO:0001525	angiogenesis	40/679	381/13456	8.94350842052389e-06	0.000415416840104334	0.000317777936144931	57875/26360/14991/11622/15251/20963/20620/18792/11504/15370/22339/13819/21926/18186/18187/18128/16176/18576/19883/19225/12509/13655/15945/20293/20296/12226/226841/20130/21825/257630/15901/12772/12766/16598/15364/19229/239027/387217/11727/67122	40
GO:0060445	branching involved in salivary gland morphogenesis	7/679	17/13456	1.00740928723946e-05	0.000463204755102426	0.000354333856691986	18591/17295/20583/21926/16193/18186/21817	7
GO:0050830	defense response to Gram-positive bacterium	13/679	62/13456	1.03042630310367e-05	0.00046905005317279	0.000358805285333362	15162/171285/78416/21926/24088/236573/76074/107607/257630/17476/257632/15040/11727	13
GO:0050670	regulation of lymphocyte proliferation	23/679	168/13456	1.21870240923762e-05	0.000549260729391054	0.000420163373606884	15170/18106/14991/11622/171285/20963/12053/15205/12511/16193/227059/16176/19260/16168/12142/384783/213208/12772/321019/245126/330817/15040/12519	23
GO:0001659	temperature homeostasis	20/679	134/13456	1.23169922180356e-05	0.000549675966436257	0.000420481014006831	53422/14245/16364/20963/22339/13819/21926/18128/16176/16190/16168/19225/227120/13653/17201/15901/242864/12772/104263/105171	20
GO:0043068	positive regulation of programmed cell death	47/679	485/13456	1.28342767934204e-05	0.000564880980423789	0.000432112266035032	20302/12122/83383/17873/14991/17865/21664/15468/15251/20963/12759/17869/67731/12053/15370/20112/50873/16004/21926/18569/67590/16193/98267/68428/209456/11910/18128/20612/215653/12156/12125/16176/11787/28019/75590/19225/20293/12226/21817/56338/13653/83925/21825/16323/12766/18413/231002	47
GO:0003206	cardiac chamber morphogenesis	16/679	92/13456	1.29058923471164e-05	0.000564880980423789	0.000432112266035032	21385/13411/11622/15251/15205/17069/11504/18186/18187/18128/14725/12156/17684/14362/20148/12168	16
GO:0045429	positive regulation of nitric oxide biosynthetic process	10/679	38/13456	1.30789204298414e-05	0.000564980521841492	0.000432188411398496	51793/14991/12759/21926/16193/16176/24088/19225/16598/19229	10
GO:0002534	cytokine production involved in inflammatory response	11/679	46/13456	1.31564005525479e-05	0.000564980521841492	0.000432188411398496	15251/21926/12511/18569/16193/73845/257630/268857/104759/245126/257632	11
GO:0032944	regulation of mononuclear cell proliferation	23/679	169/13456	1.34510872480213e-05	0.000572236907971898	0.000437739268238609	15170/18106/14991/11622/171285/20963/12053/15205/12511/16193/227059/16176/19260/16168/12142/384783/213208/12772/321019/245126/330817/15040/12519	23
GO:0043065	positive regulation of apoptotic process	46/679	474/13456	1.5307859944971e-05	0.00064519794879174	0.000493551663722846	20302/12122/83383/17873/14991/17865/21664/15468/15251/12759/17869/67731/12053/15370/20112/50873/16004/21926/18569/67590/16193/98267/68428/209456/11910/18128/20612/215653/12156/12125/16176/11787/28019/75590/19225/20293/12226/21817/56338/13653/83925/21825/16323/12766/18413/231002	46
GO:0007507	heart development	43/679	432/13456	1.57209534766916e-05	0.000654375664688675	0.000500572264080598	21385/18591/12576/17295/13411/11622/15251/15205/17069/20583/11504/20112/22339/74116/17691/18569/18186/18187/19735/209456/18128/14725/12156/14013/20190/75590/244585/12142/16468/18821/231214/73692/17684/21825/15901/381157/14362/17386/12180/110196/211323/20148/12168	43
GO:1903706	regulation of hemopoiesis	34/679	309/13456	1.58131201923889e-05	0.000654375664688675	0.000500572264080598	16950/20302/15170/12522/14991/17311/15251/14281/20963/17869/12053/83433/15001/21926/16193/215653/16190/16168/72828/16909/13655/17342/12985/12142/12571/16323/13024/12772/69068/19229/20668/16658/319817/67122	34
GO:0051046	regulation of secretion	46/679	476/13456	1.70446098756878e-05	0.000698982559947124	0.000534694826636085	13121/19015/16156/15216/19157/109934/58185/15251/20963/50873/83433/11307/21926/54393/16193/18128/12156/16176/20912/24088/20750/18576/16190/75767/17920/100503659/235442/68667/384783/19726/279561/16323/12495/12772/17386/216856/68891/16534/27062/19204/15364/18413/18111/11727/667118/99889	46
GO:1901222	regulation of NIK/NF-kappaB signaling	15/679	84/13456	1.72528436376857e-05	0.000701204859274511	0.000536394800314513	54446/171285/83433/21926/18569/215653/16176/19260/24088/107607/268857/12475/257632/69068/319817	15
GO:1902105	regulation of leukocyte differentiation	28/679	233/13456	1.78283252556638e-05	0.000718181739502492	0.000549381462000334	16950/20302/15170/12522/14991/17311/14281/20963/17869/12053/83433/15001/21926/16193/215653/16190/16168/72828/13655/17342/12142/12571/13024/12772/20668/16658/319817/67122	28
GO:0045596	negative regulation of cell differentiation	47/679	493/13456	1.96012706585098e-05	0.000782675298574884	0.00059871655898754	18591/16950/14025/19015/29869/14991/11622/17869/12053/15205/20583/22339/74116/11307/21926/18569/11302/18186/19735/18128/12156/16176/11839/22241/79362/16190/171207/12927/72828/19883/16909/81703/15945/22057/68667/12571/15901/15364/19229/210719/110789/12443/16658/319817/67122/629378/667118	47
GO:0002274	myeloid leukocyte activation	23/679	173/13456	1.97807552448494e-05	0.000782973894561344	0.000598944973455029	18106/109934/171285/16364/20963/12759/83433/21926/381319/24088/70461/16797/16190/16168/19883/217203/74732/21825/12772/68891/19204/18733/14728	23
GO:0002532	production of molecular mediator involved in inflammatory response	13/679	66/13456	2.10517459367216e-05	0.000826099547447904	0.000631934442456218	15251/20963/21926/12511/18569/16193/16190/73845/257630/268857/104759/245126/257632	13
GO:0032677	regulation of interleukin-8 production	12/679	57/13456	2.15575182020913e-05	0.00083871643466598	0.000641585876855763	18106/20963/21926/16193/16176/19260/24088/107607/257630/12475/12051/257632	12
GO:0045667	regulation of osteoblast differentiation	16/679	96/13456	2.24601553398034e-05	0.000866429043277841	0.00066278495864469	11622/20583/22339/21926/16193/80752/18128/215653/12156/11839/22057/68667/12393/12571/15901/12168	16
GO:0002698	negative regulation of immune effector process	16/679	97/13456	2.56619564094633e-05	0.000981623744335099	0.00075090448299429	16950/15170/15216/14991/109934/171285/12053/21926/16190/12509/213208/12772/257632/15040/319817/14728	16
GO:0045598	regulation of fat cell differentiation	17/679	108/13456	2.71281135420415e-05	0.00102872930321703	0.00078693842730597	29813/19015/16956/14245/15205/20583/22339/21926/12156/14013/19883/19225/81703/68667/59036/242864/20668	17
GO:0003205	cardiac chamber development	19/679	130/13456	2.73453966804176e-05	0.00102872930321703	0.00078693842730597	21385/13411/11622/15251/15205/17069/11504/18186/18187/18128/14725/12156/12142/73692/17684/381157/14362/20148/12168	19
GO:0050921	positive regulation of chemotaxis	16/679	98/13456	2.92614813838562e-05	0.0010715137913924	0.000819666918399329	18591/17295/20303/20583/22339/83433/18186/16176/15945/21983/20296/21825/12772/12766/19229/12168	16
GO:0030593	neutrophil chemotaxis	13/679	68/13456	2.94242583312939e-05	0.0010715137913924	0.000819666918399329	20302/20305/20303/20963/16176/18578/20750/15945/20293/20306/20296/257632/20310	13
GO:0042102	positive regulation of T cell proliferation	13/679	68/13456	2.94242583312939e-05	0.0010715137913924	0.000819666918399329	18106/171285/20963/15205/12511/16193/16176/19260/16168/12772/330817/15040/12519	13
GO:2001057	reactive nitrogen species metabolic process	13/679	68/13456	2.94242583312939e-05	0.0010715137913924	0.000819666918399329	51793/14991/12759/21926/16193/16176/24088/19883/19225/217203/211389/16598/19229	13
GO:0071621	granulocyte chemotaxis	15/679	88/13456	3.06448370261336e-05	0.00110710554081714	0.000846893240454887	20302/20305/20303/20963/22339/16176/18578/20750/15945/20293/20306/20296/21825/257632/20310	15
GO:0002704	negative regulation of leukocyte mediated immunity	10/679	42/13456	3.38989475843674e-05	0.00121502369609481	0.00092944648660661	15170/15216/14991/109934/171285/12053/213208/12772/257632/15040	10
GO:1900017	positive regulation of cytokine production involved in inflammatory response	7/679	20/13456	3.51521060337818e-05	0.00125009677082637	0.000956276042432156	21926/12511/16193/73845/257630/245126/257632	7
GO:0002683	negative regulation of immune system process	32/679	295/13456	3.71021033973078e-05	0.00129626484382579	0.000991592846030831	16950/15170/15216/14991/109934/17311/171285/17869/12053/57781/15001/21926/19260/16190/72828/12509/20293/242248/12142/21825/12571/213208/12772/268857/245126/257632/15040/16658/12519/319817/67122/14728	32
GO:0050673	epithelial cell proliferation	32/679	295/13456	3.71021033973078e-05	0.00129626484382579	0.000991592846030831	18591/18140/19015/12576/18612/18792/17869/15205/20583/15370/22339/21926/16193/18128/12156/11839/140571/13655/20293/20296/226841/21825/12571/15901/268857/12766/257632/15364/12168/12443/11727/67122	32
GO:0060411	cardiac septum morphogenesis	11/679	51/13456	3.7304634125918e-05	0.00129626484382579	0.000991592846030831	21385/13411/15205/18186/18187/18128/14725/17684/14362/20148/12168	11
GO:0007431	salivary gland development	8/679	27/13456	3.80582185635973e-05	0.00130256399174056	0.000996411452381321	18591/17295/20583/21926/16193/18186/81879/21817	8
GO:0010573	vascular endothelial growth factor production	8/679	27/13456	3.80582185635973e-05	0.00130256399174056	0.000996411452381321	15251/21926/16193/16176/19883/19225/20296/12772	8
GO:0032611	interleukin-1 beta production	13/679	70/13456	4.05698024799448e-05	0.00136795363621266	0.00104643202030142	20302/16956/83433/21926/16193/16176/24088/217203/107607/13653/268857/257632/232801	13
GO:0072676	lymphocyte migration	13/679	70/13456	4.05698024799448e-05	0.00136795363621266	0.00104643202030142	20302/20305/20303/57781/15945/20293/20306/20296/12772/12766/321019/76088/19229	13
GO:1900015	regulation of cytokine production involved in inflammatory response	10/679	43/13456	4.21972484654347e-05	0.00141236672804896	0.00108040633067847	21926/12511/18569/16193/73845/257630/268857/104759/245126/257632	10
GO:0046633	alpha-beta T cell proliferation	9/679	35/13456	4.3482006825736e-05	0.00143456647172729	0.00109738828241464	18106/20963/19260/16168/12772/245126/15040/12519/14728	9
GO:0002700	regulation of production of molecular mediator of immune response	17/679	112/13456	4.38388820485688e-05	0.00143456647172729	0.00109738828241464	18106/15216/14991/58185/12053/21926/16193/16177/16176/19260/24088/16190/68667/257630/12772/257632/15040	17
GO:0032637	interleukin-8 production	12/679	61/13456	4.41211129265862e-05	0.00143456647172729	0.00109738828241464	18106/20963/21926/16193/16176/19260/24088/107607/257630/12475/12051/257632	12
GO:1901224	positive regulation of NIK/NF-kappaB signaling	12/679	61/13456	4.41211129265862e-05	0.00143456647172729	0.00109738828241464	54446/171285/83433/21926/18569/16176/24088/107607/12475/257632/69068/319817	12
GO:0019730	antimicrobial humoral response	11/679	52/13456	4.51853045880631e-05	0.00145874827294229	0.00111588643208147	14038/78416/15945/20296/257630/12051/257632/20310/15040/100034251/11727	11
GO:0072001	renal system development	24/679	195/13456	4.74901697287636e-05	0.00152236093384037	0.00116454767578021	18591/18263/11622/71371/17869/15205/11504/22339/18186/18128/14725/12156/12125/14013/20750/19277/22420/244585/99929/12142/13653/231214/73692/381157	24
GO:0002791	regulation of peptide secretion	27/679	234/13456	5.15250420942486e-05	0.00164015378750363	0.00125465468713857	13121/19015/15216/58185/15251/50873/83433/11307/21926/54393/16193/16176/24088/18576/75767/235442/68667/384783/19726/17386/216856/16534/15364/18111/11727/667118/99889	27
GO:0002577	regulation of antigen processing and presentation	6/679	15/13456	5.46101807400599e-05	0.00170264070362159	0.00130245477929429	15216/83433/15001/107607/21825/257632	6
GO:0032695	negative regulation of interleukin-12 production	6/679	15/13456	5.46101807400599e-05	0.00170264070362159	0.00130245477929429	24088/21942/21825/268857/257632/232801	6
GO:2001026	regulation of endothelial cell chemotaxis	6/679	15/13456	5.46101807400599e-05	0.00170264070362159	0.00130245477929429	18591/17295/20583/22339/18128/21825	6
GO:0042742	defense response to bacterium	21/679	161/13456	5.97345255173132e-05	0.00184973850445449	0.00141497895031344	14038/15162/14991/171285/20963/78416/21425/83433/21926/24088/236573/19374/76074/107607/257630/17476/12051/257632/15040/100034251/11727	21
GO:0030098	lymphocyte differentiation	32/679	304/13456	6.65647020617008e-05	0.00204196946738691	0.00156202825781979	16950/14025/15170/12522/14991/11622/58185/16364/20963/12053/15001/16193/16176/19260/16190/16168/19883/19374/13655/12142/13653/12393/12571/13024/12772/321019/12051/19229/20668/16658/319817/67122	32
GO:0051048	negative regulation of secretion	18/679	127/13456	6.68395102461883e-05	0.00204196946738691	0.00156202825781979	13121/16156/109934/58185/50873/21926/54393/16193/18128/16176/20912/18576/75767/100503659/279561/12495/12772/18413	18
GO:0050679	positive regulation of epithelial cell proliferation	19/679	139/13456	7.00288754152821e-05	0.00212514293926909	0.00162565277104388	18591/17869/15370/22339/21926/16193/18128/12156/140571/13655/20296/226841/15901/257632/15364/12168/12443/11727/67122	19
GO:0042098	T cell proliferation	21/679	163/13456	7.1656237458667e-05	0.0021601271053765	0.00165241431518488	15170/18106/14991/171285/20963/15205/12511/16193/16176/19260/16168/19171/213208/12772/76088/245126/330817/15040/12519/319817/14728	21
GO:0001822	kidney development	23/679	188/13456	7.45403180387949e-05	0.00223228636653023	0.00170761338000231	18591/18263/11622/71371/17869/15205/11504/22339/18186/18128/14725/12156/12125/20750/19277/22420/244585/99929/12142/13653/231214/73692/381157	23
GO:0002790	peptide secretion	32/679	306/13456	7.54729375021525e-05	0.00224544321248234	0.00171767786210609	13121/19015/15216/11303/72472/56193/58185/15251/50873/83433/11307/21926/54393/16193/68428/16176/20912/24088/18576/75767/235442/68667/384783/19726/17386/216856/16534/15364/18111/11727/667118/99889	32
GO:0002287	alpha-beta T cell activation involved in immune response	11/679	55/13456	7.79739994068324e-05	0.00228992029225743	0.00175170112080001	16950/14991/16364/12053/16193/16190/19883/12772/321019/12051/319817	11
GO:0080164	regulation of nitric oxide metabolic process	11/679	55/13456	7.79739994068324e-05	0.00228992029225743	0.00175170112080001	51793/14991/12759/21926/16193/16176/24088/19225/217203/16598/19229	11
GO:0002685	regulation of leukocyte migration	20/679	152/13456	7.85880371330566e-05	0.00229315862198509	0.00175417831873247	109934/20303/17311/57781/22339/83433/16177/16176/19260/24088/15945/20293/20296/21825/12772/12766/76088/257632/19204/19229	20
GO:0002263	cell activation involved in immune response	25/679	214/13456	7.90945714356108e-05	0.0022932387845535	0.00175423964002012	16950/18106/14991/109934/171285/16364/20963/17079/12053/83433/16193/22256/16797/16190/19883/74732/12772/321019/68891/12051/69068/19204/19229/319817/14728	25
GO:0048660	regulation of smooth muscle cell proliferation	18/679	129/13456	8.22576880310865e-05	0.00236985440454118	0.00181284764828004	18591/19015/12576/15251/17869/11504/22339/21926/18569/16193/16168/19225/21817/13653/21825/19222/19204/11727	18
GO:0046641	positive regulation of alpha-beta T cell proliferation	6/679	16/13456	8.36592143692867e-05	0.00239507386043392	0.00183213956394307	18106/20963/19260/12772/15040/12519	6
GO:0046209	nitric oxide metabolic process	12/679	65/13456	8.47888204842988e-05	0.0024122419427783	0.00184527248790829	51793/14991/12759/21926/16193/16176/24088/19883/19225/217203/16598/19229	12
GO:0002367	cytokine production involved in immune response	13/679	75/13456	8.57812854890959e-05	0.00242292173105335	0.00185344211597551	15216/14991/58185/12053/21926/16193/16177/16176/24088/68667/12772/257632/15040	13
GO:0050920	regulation of chemotaxis	20/679	153/13456	8.62287610787879e-05	0.00242292173105335	0.00185344211597551	18591/17295/20303/20583/22339/83433/18186/18128/16176/15945/21983/20293/20296/21825/12772/12766/321019/257632/19229/12168	20
GO:0033002	muscle cell proliferation	22/679	178/13456	9.117157562871e-05	0.00254609209976618	0.00194766271992104	21385/18591/19015/12576/15251/17869/11504/22339/21926/18569/16193/18128/16168/19225/21817/13653/16468/17684/21825/19222/19204/11727	22
GO:0050878	regulation of body fluid levels	25/679	216/13456	9.20239495641695e-05	0.00255422572204939	0.00195388462874373	18591/29813/15170/17295/279028/56193/15251/14026/20963/18792/22339/26570/20912/11832/21682/19277/72828/21825/279561/12495/17386/16534/12443/21824/14728	25
GO:0014015	positive regulation of gliogenesis	11/679	56/13456	9.26768051918837e-05	0.00255675646808154	0.00195582055231101	18755/17869/15205/21926/16193/18128/14725/19262/12156/16176/24088	11
GO:0035710	CD4-positive	alpha-beta T cell activation	14/679	86/13456	9.41872477625562e-05	0.00258277320370576	0.00197572235636358	16950/12522/58185/16364/12053/16193/16190/19883/12772/321019/12051/245126/319817/14728	14
GO:0071674	mononuclear cell migration	17/679	119/13456	9.5672354775097e-05	0.00260778777806133	0.00199485754551542	18591/20302/20305/20303/57781/19277/15945/20293/20306/20296/68667/21825/12772/12766/321019/76088/19229	17
GO:0002724	regulation of T cell cytokine production	7/679	23/13456	9.73463362180919e-05	0.00261617012440197	0.00200126971869432	15216/58185/16193/16177/16176/68667/12772	7
GO:0007264	small GTPase mediated signal transduction	36/679	366/13456	9.79935563397602e-05	0.00261617012440197	0.00200126971869432	244668/17295/11303/19157/109934/69288/17311/13998/56784/20620/12053/212307/106952/11302/18186/19731/226751/18128/29815/22241/16797/17207/19395/67168/260409/101497/20130/208869/72754/217944/217692/244418/76088/263406/27387/211323	36
GO:0001936	regulation of endothelial cell proliferation	15/679	97/13456	9.80807126337319e-05	0.00261617012440197	0.00200126971869432	18591/15370/22339/21926/12156/140571/13655/20293/20296/226841/21825/12766/12168/11727/67122	15
GO:1903531	negative regulation of secretion by cell	16/679	108/13456	9.82787986100036e-05	0.00261617012440197	0.00200126971869432	13121/16156/109934/58185/50873/54393/16193/18128/16176/20912/18576/75767/100503659/12495/12772/18413	16
GO:0007517	muscle organ development	26/679	230/13456	9.94052013004125e-05	0.00263077021115975	0.002012438224613	26556/17295/71371/12227/14281/17869/17069/107589/20273/15370/16193/11910/18128/14725/12156/16656/20190/60406/14733/13653/17684/14362/242620/12180/210719/211323	26
GO:0048659	smooth muscle cell proliferation	18/679	131/13456	0.000100732145130898	0.00265047817708584	0.00202751406202015	18591/19015/12576/15251/17869/11504/22339/21926/18569/16193/16168/19225/21817/13653/21825/19222/19204/11727	18
GO:0032612	interleukin-1 production	14/679	87/13456	0.000107141405286496	0.00280291768312717	0.00214412443247264	20302/16956/171285/83433/21926/16193/16176/24088/217203/107607/13653/268857/257632/232801	14
GO:0001503	ossification	29/679	271/13456	0.000108217922110061	0.00281490275111427	0.00215329254941402	11622/58185/15251/20583/22339/21926/54393/16193/80752/18128/215653/12156/20750/11839/23845/20190/19225/22057/68667/12393/12571/15901/14362/17386/19229/20148/12168/110789/12096	29
GO:0002262	myeloid cell homeostasis	20/679	156/13456	0.000113249728651075	0.00291250149615646	0.00222795184286504	17311/15251/12053/22339/13819/16193/12125/14013/26570/18578/208638/16909/20296/17684/12571/16323/12772/16598/16658/14728	20
GO:0050866	negative regulation of cell activation	20/679	156/13456	0.000113249728651075	0.00291250149615646	0.00222795184286504	18591/16950/15170/15216/14991/109934/171285/12053/19260/16190/72828/242248/12142/213208/12772/245126/12519/319817/67122/14728	20
GO:0014009	glial cell proliferation	10/679	48/13456	0.000114567442488416	0.00292983706858017	0.00224121289031154	18755/12759/17869/15205/83433/21926/16193/18128/16176/11839	10
GO:0043312	neutrophil degranulation	5/679	11/13456	0.000115483110674188	0.00293675485915588	0.00224650473454991	109934/20963/74732/68891/19204	5
GO:0032891	negative regulation of organic acid transport	6/679	17/13456	0.000123796553367591	0.00312621135341532	0.00239143168002448	21926/54393/19735/16176/384783/21825	6
GO:0050729	positive regulation of inflammatory response	15/679	99/13456	0.000124306734395468	0.00312621135341532	0.00239143168002448	20302/16956/83433/21926/18569/16193/16176/24088/19225/21817/242864/12772/18413/15040/232801	15
GO:0014070	response to organic cyclic compound	44/679	487/13456	0.000126697306181513	0.00316882493262774	0.00242402943232184	18591/12576/83383/26556/12522/11622/19216/74747/15468/19739/12759/67731/20583/21926/16193/12156/16176/26570/18578/14284/20750/11839/20190/19883/99586/99929/20293/74191/68667/13653/18821/13849/235283/12571/16323/77128/104263/257632/15364/12916/224829/723827/208715/442846	44
GO:0032729	positive regulation of interferon-gamma production	11/679	58/13456	0.000129280581444283	0.00321576615701845	0.00245993766705601	18106/14991/171285/21926/16177/16176/19260/18578/12772/12475/12051	11
GO:0002286	T cell activation involved in immune response	13/679	78/13456	0.000129990466639548	0.00321585110947403	0.00246000265242348	16950/14991/171285/16364/12053/16193/16190/19883/74732/12772/321019/12051/319817	13
GO:0007435	salivary gland morphogenesis	7/679	24/13456	0.000131489453379448	0.00321795694507122	0.00246161353581898	18591/17295/20583/21926/16193/18186/21817	7
GO:0010574	regulation of vascular endothelial growth factor production	7/679	24/13456	0.000131489453379448	0.00321795694507122	0.00246161353581898	15251/16193/16176/19883/19225/20296/12772	7
GO:0001655	urogenital system development	25/679	221/13456	0.000132978343458788	0.00323148755776569	0.00247196393513295	18591/12576/18263/11622/71371/17869/15205/11504/22339/18186/18128/14725/12156/12125/14013/20750/19277/22420/244585/99929/12142/13653/231214/73692/381157	25
GO:0043367	CD4-positive	alpha-beta T cell differentiation	12/679	68/13456	0.000133462139907722	0.00323148755776569	0.00247196393513295	16950/12522/58185/16364/12053/16193/16190/19883/12772/321019/12051/319817	12
GO:0050777	negative regulation of immune response	16/679	111/13456	0.000136836907913919	0.0032956698667945	0.00252106093778471	16950/15170/15216/14991/109934/171285/12053/16190/12509/213208/12772/268857/257632/15040/319817/14728	16
GO:0050727	regulation of inflammatory response	27/679	248/13456	0.000139038884324909	0.00332625549600312	0.00254445777004401	20302/19015/16956/109934/12053/57781/83433/21926/18569/16193/16177/16176/24088/19883/23959/19225/21817/213208/13024/242864/12772/268857/12702/257632/18413/15040/232801	27
GO:0038061	NIK/NF-kappaB signaling	15/679	100/13456	0.000139568277622275	0.00332625549600312	0.00254445777004401	54446/171285/83433/21926/18569/215653/16176/19260/24088/107607/268857/12475/257632/69068/319817	15
GO:0002460	adaptive immune response based on somatic recombination of immune receptors built from immunoglobulin superfamily domains	26/679	235/13456	0.000141551443925274	0.00335594881639504	0.00256717202031144	16950/15170/15216/14991/171285/58185/16364/12053/22339/21926/54123/16193/16177/16176/22256/16190/19883/68667/74732/213208/12772/12051/257632/18733/15040/319817	26
GO:0032649	regulation of interferon-gamma production	13/679	79/13456	0.000148545098556436	0.00348885823294571	0.00266884262200176	18106/14991/171285/21926/16177/16176/19260/18578/213208/12772/12475/12051/257632	13
GO:0042063	gliogenesis	27/679	249/13456	0.000148690355270533	0.00348885823294571	0.00266884262200176	18591/20302/18755/72948/12759/17869/15205/83433/21926/16193/18128/14725/19262/12156/16176/24088/11839/14733/20293/20296/12571/225608/12772/321019/15364/211323/20668	27
GO:0002366	leukocyte activation involved in immune response	24/679	210/13456	0.000153768486448034	0.0035859314936119	0.00274309994007682	16950/18106/14991/109934/171285/16364/20963/17079/12053/83433/16193/22256/16797/16190/19883/74732/12772/321019/68891/12051/19204/19229/319817/14728	24
GO:0048608	reproductive structure development	31/679	304/13456	0.000154403025647613	0.0035859314936119	0.00274309994007682	18591/19015/12576/15170/17295/12124/11622/71371/17311/380684/15251/15205/11504/22339/21425/13819/18128/14725/12125/19143/19225/99929/226841/12142/17684/16323/381157/12702/15364/12168/12443	31
GO:0002573	myeloid leukocyte differentiation	21/679	172/13456	0.000155670505096785	0.00359701593502824	0.00275157911226377	20302/17311/14281/16364/17869/22339/83433/21926/80752/381319/215653/24088/16168/72828/17342/12985/17684/12571/321019/18733/16658	21
GO:0016525	negative regulation of angiogenesis	13/679	80/13456	0.00016933371677656	0.00389296504427728	0.00297796882029166	14991/20620/11504/21926/18576/12509/15945/20296/21825/257630/12772/12766/16598	13
GO:0002703	regulation of leukocyte mediated immunity	22/679	186/13456	0.000174381986696787	0.00396893401721888	0.00303608216838406	15170/15216/14991/109934/171285/58185/20963/12053/21926/16193/16177/16176/24088/16190/20296/68667/213208/12772/68891/257632/19204/15040	22
GO:0046883	regulation of hormone secretion	22/679	186/13456	0.000174381986696787	0.00396893401721888	0.00303608216838406	19015/16156/15216/15251/50873/21926/54393/16193/16176/20750/18576/75767/235442/68667/384783/19726/16323/216856/15364/18413/18111/667118	22
GO:0002707	negative regulation of lymphocyte mediated immunity	8/679	33/13456	0.000181907145122057	0.00407902130342662	0.00312029471643125	15170/15216/14991/171285/12053/213208/257632/15040	8
GO:0035335	peptidyl-tyrosine dephosphorylation	8/679	33/13456	0.000181907145122057	0.00407902130342662	0.00312029471643125	15170/19260/19277/75590/319520/72828/240672/235584	8
GO:0042092	type 2 immune response	8/679	33/13456	0.000181907145122057	0.00407902130342662	0.00312029471643125	58185/12053/16193/16190/12772/12051/257632/14728	8
GO:0061458	reproductive system development	31/679	307/13456	0.000184315198398605	0.00411275874073749	0.00314610256090085	18591/19015/12576/15170/17295/12124/11622/71371/17311/380684/15251/15205/11504/22339/21425/13819/18128/14725/12125/19143/19225/99929/226841/12142/17684/16323/381157/12702/15364/12168/12443	31
GO:0061418	regulation of transcription from RNA polymerase II promoter in response to hypoxia	5/679	12/13456	0.000189764482698559	0.00419324235555262	0.00320766943672372	15251/22339/18128/13653/17684	5
GO:1902563	regulation of neutrophil activation	5/679	12/13456	0.000189764482698559	0.00419324235555262	0.00320766943672372	109934/20963/21926/68891/19204	5
GO:0032732	positive regulation of interleukin-1 production	10/679	51/13456	0.000195212537780708	0.00425536215621266	0.00325518869964654	20302/16956/171285/21926/16193/24088/107607/13653/257632/232801	10
GO:0045600	positive regulation of fat cell differentiation	10/679	51/13456	0.000195212537780708	0.00425536215621266	0.00325518869964654	29813/16956/20583/12156/14013/19225/68667/59036/242864/20668	10
GO:0060537	muscle tissue development	31/679	308/13456	0.000195380204448253	0.00425536215621266	0.00325518869964654	21385/26556/17295/11622/12227/14281/17869/17069/107589/15370/22339/74116/17691/19735/11910/18128/14725/12156/16656/20190/60406/14733/99929/13653/16468/18821/17684/242620/12180/110196/211323	31
GO:0032757	positive regulation of interleukin-8 production	9/679	42/13456	0.000200038362537556	0.00433606964890931	0.00331692683345481	18106/20963/21926/16193/16176/24088/107607/12475/257632	9
GO:0046879	hormone secretion	25/679	227/13456	0.000202998905549019	0.00436635968663984	0.00334009754958019	19015/16156/15216/72472/15251/50873/21926/54393/16193/14725/16176/20912/20750/18576/75767/235442/68667/384783/19726/16323/216856/15364/18413/18111/667118	25
GO:0002443	leukocyte mediated immunity	29/679	281/13456	0.000203354185757391	0.00436635968663984	0.00334009754958019	15170/15216/14991/109934/171285/58185/20963/12053/21926/54123/16193/16177/16176/24088/22256/16797/16190/20296/68667/74732/213208/12772/68891/12051/257632/19204/18733/15040/667281	29
GO:0045765	regulation of angiogenesis	24/679	214/13456	0.000205366789478355	0.00438887148218532	0.00335731820901606	14991/15251/20620/11504/22339/21926/18186/16176/18576/12509/15945/20296/12226/226841/20130/21825/257630/15901/12772/12766/16598/15364/19229/387217	24
GO:0042129	regulation of T cell proliferation	17/679	127/13456	0.000214951111132467	0.00457223111156538	0.00349758128689721	15170/18106/14991/171285/20963/15205/12511/16193/16176/19260/16168/213208/12772/245126/330817/15040/12519	17
GO:2000181	negative regulation of blood vessel morphogenesis	13/679	82/13456	0.000218495830938692	0.00462434175982267	0.00353744393245153	14991/20620/11504/21926/18576/12509/15945/20296/21825/257630/12772/12766/16598	13
GO:0045926	negative regulation of growth	22/679	189/13456	0.000219745168110703	0.00462434175982267	0.00353744393245153	14025/19015/12576/29869/55942/15251/12053/74116/11302/18186/19735/18128/11787/22241/28019/171207/16468/17684/16323/170742/12168/629378	22
GO:0007162	negative regulation of cell adhesion	24/679	215/13456	0.000220448629587329	0.00462434175982267	0.00353744393245153	16950/15170/15216/14991/171285/12053/20583/22339/18128/12156/19260/18576/16190/11856/140571/12927/72828/21825/17196/213208/245126/12519/319817/67122	24
GO:0046632	alpha-beta T cell differentiation	14/679	93/13456	0.00022222617967504	0.00464024573339809	0.00354960986173362	16950/12522/58185/16364/20963/12053/16193/16190/19883/12142/12772/321019/12051/319817	14
GO:0062012	regulation of small molecule metabolic process	28/679	269/13456	0.000225795182488843	0.0046932405054302	0.00359014882803698	19015/18106/74747/56193/15251/17869/20583/50873/83433/11307/17691/21926/14933/16193/266645/12156/16176/26570/19883/19225/271221/69863/13653/384783/12495/19204/19229/110196	28
GO:0036230	granulocyte activation	8/679	34/13456	0.000227478732051416	0.00470674176499112	0.00360047677333055	109934/20963/21926/16168/74732/12772/68891/19204	8
GO:0048844	artery morphogenesis	10/679	52/13456	0.000230933307588479	0.00474591118193817	0.00363043987370537	21385/15205/107589/22339/18186/18128/14725/12142/17684/12168	10
GO:0010817	regulation of hormone levels	32/679	325/13456	0.000231457004040043	0.00474591118193817	0.00363043987370537	19015/16156/15216/72472/15251/77974/78925/50873/21926/54393/16193/14725/12156/16176/20912/20750/18576/75767/99929/235442/68667/13653/384783/19726/16323/16522/216856/15364/18413/20148/18111/667118	32
GO:0045444	fat cell differentiation	22/679	190/13456	0.000237023087334053	0.00481673184348322	0.00368461496120675	29813/19015/16956/71371/14245/15205/20583/15370/22339/21926/19735/12156/14013/19883/19225/81703/68667/59036/242864/12443/20668/442846	22
GO:0001818	negative regulation of cytokine production	23/679	203/13456	0.000238085383300467	0.00481673184348322	0.00368461496120675	15170/15216/17295/12522/171285/12053/57781/83433/21926/18569/16193/19260/24088/21942/12509/242248/21825/213208/268857/12051/16598/257632/232801	23
GO:0019932	second-messenger-mediated signaling	23/679	203/13456	0.000238085383300467	0.00481673184348322	0.00368461496120675	54446/20303/11622/20963/22339/83433/21926/19735/70461/18576/16797/14764/68667/18821/21825/54199/233979/12772/12766/19229/211323/100504518/252837	23
GO:0006809	nitric oxide biosynthetic process	11/679	62/13456	0.000240218819560769	0.00483838967540098	0.00370118237124837	51793/14991/12759/21926/16193/16176/24088/19883/19225/16598/19229	11
GO:0010595	positive regulation of endothelial cell migration	13/679	83/13456	0.000247350174938109	0.00493832454525558	0.00377762871050445	18591/17295/15251/20620/20583/22339/18186/12927/19225/20130/21825/19229/12168	13
GO:1901343	negative regulation of vasculature development	13/679	83/13456	0.000247350174938109	0.00493832454525558	0.00377762871050445	14991/20620/11504/21926/18576/12509/15945/20296/21825/257630/12772/12766/16598	13
GO:0007420	brain development	40/679	443/13456	0.000258194588582272	0.00512492591588145	0.00392037159599849	12032/17295/16560/11864/109934/74747/380684/12227/15251/15205/11302/18186/18187/18128/14725/12156/14013/26570/20912/15572/22241/19883/269209/244585/231380/384783/73692/16323/211612/223701/242620/78286/15364/68519/211323/18111/320277/16658/231003/140810	40
GO:0002695	negative regulation of leukocyte activation	18/679	141/13456	0.000258948365696998	0.00512492591588145	0.00392037159599849	16950/15170/15216/14991/109934/171285/12053/19260/16190/242248/12142/213208/12772/245126/12519/319817/67122/14728	18
GO:0060322	head development	43/679	488/13456	0.000260948863505594	0.00514216115444789	0.00393355589189567	12032/17295/16560/11864/109934/71371/74747/380684/12227/15251/15205/11302/18186/18187/18128/14725/12156/14013/26570/20912/15572/22241/19883/269209/244585/99929/231380/20130/384783/73692/16323/211612/223701/242620/78286/15364/68519/211323/18111/320277/16658/231003/140810	43
GO:0009914	hormone transport	25/679	231/13456	0.000266235362069362	0.00520179846554784	0.00397917614559991	19015/16156/15216/72472/15251/50873/21926/54393/16193/14725/16176/20912/20750/18576/75767/235442/68667/384783/19726/16323/216856/15364/18413/18111/667118	25
GO:0030001	metal ion transport	33/679	342/13456	0.000269836517528184	0.00520179846554784	0.00397917614559991	18591/15170/26556/68279/20303/11622/19739/76137/15205/107589/227059/53945/227731/14725/19260/18578/20190/72828/19225/15945/20293/100503659/68667/18821/279561/16518/233979/12766/16534/19229/94219/232801/214922	33
GO:0002687	positive regulation of leukocyte migration	15/679	106/13456	0.000269942841416196	0.00520179846554784	0.00397917614559991	20303/17311/22339/83433/16177/16176/24088/15945/20293/20296/21825/12772/76088/19204/19229	15
GO:1901342	regulation of vasculature development	24/679	218/13456	0.000271735953406713	0.00520179846554784	0.00397917614559991	14991/15251/20620/11504/22339/21926/18186/16176/18576/12509/15945/20296/12226/226841/20130/21825/257630/15901/12772/12766/16598/15364/19229/387217	24
GO:0002294	CD4-positive	alpha-beta T cell differentiation involved in immune response	10/679	53/13456	0.000271974524341034	0.00520179846554784	0.00397917614559991	16950/16364/12053/16193/16190/19883/12772/321019/12051/319817	10
GO:0042093	T-helper cell differentiation	10/679	53/13456	0.000271974524341034	0.00520179846554784	0.00397917614559991	16950/16364/12053/16193/16190/19883/12772/321019/12051/319817	10
GO:0045428	regulation of nitric oxide biosynthetic process	10/679	53/13456	0.000271974524341034	0.00520179846554784	0.00397917614559991	51793/14991/12759/21926/16193/16176/24088/19225/16598/19229	10
GO:0032651	regulation of interleukin-1 beta production	11/679	63/13456	0.000278000950809288	0.00529481308821707	0.00405032876140553	20302/16956/83433/21926/16193/24088/107607/13653/268857/257632/232801	11
GO:0007599	hemostasis	16/679	118/13456	0.000281499648338448	0.00532633638079997	0.00407444287015223	18591/29813/15170/279028/56193/14026/20963/18792/26570/20912/21682/72828/21825/12495/21824/14728	16
GO:0035272	exocrine system development	8/679	35/13456	0.000281996280266431	0.00532633638079997	0.00407444287015223	18591/17295/20583/21926/16193/18186/81879/21817	8
GO:0032731	positive regulation of interleukin-1 beta production	9/679	44/13456	0.000290587267330968	0.00546592248301887	0.00418122088008196	20302/16956/21926/16193/24088/107607/13653/257632/232801	9
GO:0003007	heart morphogenesis	21/679	180/13456	0.000293798366866212	0.00550358092993826	0.00421002814638696	21385/13411/11622/15251/15205/17069/20583/11504/22339/18569/18186/18187/18128/14725/12156/20190/17684/21825/14362/20148/12168	21
GO:0070528	protein kinase C signaling	7/679	27/13456	0.000295549337118621	0.0055136909121474	0.0042177618946868	18591/56193/18755/110197/22339/110789/227333	7
GO:0002293	alpha-beta T cell differentiation involved in immune response	10/679	54/13456	0.000318942976568032	0.0059017415826735	0.00451460576160484	16950/16364/12053/16193/16190/19883/12772/321019/12051/319817	10
GO:0046635	positive regulation of alpha-beta T cell activation	10/679	54/13456	0.000318942976568032	0.0059017415826735	0.00451460576160484	18106/12522/20963/16193/19260/15505/16190/12772/15040/12519	10
GO:0001935	endothelial cell proliferation	15/679	108/13456	0.000332129411406248	0.00612086267498477	0.00468222498585922	18591/15370/22339/21926/12156/140571/13655/20293/20296/226841/21825/12766/12168/11727/67122	15
GO:2000377	regulation of reactive oxygen species metabolic process	20/679	169/13456	0.000336417341613997	0.00617488604446336	0.00472355078972454	18591/51793/14991/15251/20963/18792/12759/50873/21926/16193/16176/24088/19225/217203/21825/68891/16598/19229/22654/53881	20
GO:0040036	regulation of fibroblast growth factor receptor signaling pathway	6/679	20/13456	0.000340439071522483	0.0062236090504833	0.00476082201900813	18591/80752/14733/12393/21825/213452	6
GO:0048010	vascular endothelial growth factor receptor signaling pathway	8/679	36/13456	0.000346736122653498	0.00627190352213009	0.00479776543594634	18591/15251/22339/18186/12927/12509/20296/19229	8
GO:0032655	regulation of interleukin-12 production	9/679	45/13456	0.000347214342613529	0.00627190352213009	0.00479776543594634	14991/20963/16994/24088/21942/21825/268857/257632/232801	9
GO:1905517	macrophage migration	9/679	45/13456	0.000347214342613529	0.00627190352213009	0.00479776543594634	20302/68279/57781/83433/20293/20296/21825/12772/19229	9
GO:0003279	cardiac septum development	13/679	86/13456	0.000354242932589987	0.0063735724472317	0.00487553826090151	21385/13411/15205/18186/18187/18128/14725/12142/73692/17684/14362/20148/12168	13
GO:0048732	gland development	30/679	305/13456	0.000365729306145672	0.00655432992746102	0.00501381079457059	21385/18591/12576/17295/18612/11622/71371/15251/18792/15205/17069/20583/16004/22339/21926/16193/18186/81879/18128/12156/12125/11839/244585/21817/16468/384783/17684/15364/12443/16658	30
GO:0002709	regulation of T cell mediated immunity	11/679	65/13456	0.000368722009195746	0.00655570574555444	0.00501486324259876	15216/14991/58185/16193/16177/16176/68667/213208/12772/257632/15040	11
GO:0071347	cellular response to interleukin-1	11/679	65/13456	0.000368722009195746	0.00655570574555444	0.00501486324259876	20302/20305/20303/16193/16177/16176/19883/20293/20306/20296/13653	11
GO:0044057	regulation of system process	35/679	377/13456	0.000370126620520099	0.00655570574555444	0.00501486324259876	18591/26556/11622/19216/14245/15251/72948/67731/50873/74116/13819/21926/16193/19735/18128/18578/19277/20190/19225/240672/235442/68667/16468/17201/18821/279561/16323/16518/216856/19204/19229/110196/21957/211323/12168	35
GO:0030099	myeloid cell differentiation	32/679	334/13456	0.000377045428450286	0.00662737237592977	0.00506968546378126	29813/20302/15170/17311/15251/14281/16364/17869/12053/22339/83433/13819/21926/80752/381319/215653/24088/23845/16168/72828/208638/16909/17342/12985/17684/12571/16323/321019/16598/18733/19229/16658	32
GO:0003197	endocardial cushion development	7/679	28/13456	0.000377084676046971	0.00662737237592977	0.00506968546378126	21385/20583/18128/12156/17684/21825/12168	7
GO:0050769	positive regulation of neurogenesis	23/679	210/13456	0.000389677937189109	0.00682236142340317	0.00521884460008734	14025/17295/76901/18755/15251/17869/15205/22339/21926/16193/18186/18128/14725/19262/12156/16176/24088/140571/233489/242620/17755/211323/12168	23
GO:1903426	regulation of reactive oxygen species biosynthetic process	13/679	87/13456	0.000397652660359519	0.0069085861998121	0.00528480324414449	51793/14991/12759/50873/21926/16193/16176/24088/19225/16598/19229/22654/53881	13
GO:0002822	regulation of adaptive immune response based on somatic recombination of immune receptors built from immunoglobulin superfamily domains	18/679	146/13456	0.000399156012862606	0.0069085861998121	0.00528480324414449	16950/15170/15216/14991/171285/58185/12053/21926/16193/16177/16176/16190/68667/213208/12772/257632/15040/319817	18
GO:0022408	negative regulation of cell-cell adhesion	18/679	146/13456	0.000399156012862606	0.0069085861998121	0.00528480324414449	16950/15170/15216/14991/171285/12053/22339/18128/12156/19260/16190/72828/17196/213208/245126/12519/319817/67122	18
GO:0031214	biomineral tissue development	15/679	110/13456	0.000406251573098574	0.00700476197251784	0.00535837401838151	15251/80752/18128/12156/20515/20750/58235/19225/22420/68667/17386/19229/12168/110789/12096	15
GO:0045580	regulation of T cell differentiation	16/679	122/13456	0.000412819925655893	0.0070911558550401	0.00542446202212391	16950/12522/14991/20963/12053/15001/16193/16190/16168/13655/12142/13024/12772/20668/319817/67122	16
GO:0050708	regulation of protein secretion	23/679	211/13456	0.000417109863507731	0.00713791014544058	0.00546022725953136	13121/19015/58185/15251/50873/83433/11307/21926/16193/16176/24088/18576/75767/68667/384783/19726/17386/216856/16534/18111/11727/667118/99889	23
GO:0051962	positive regulation of nervous system development	25/679	238/13456	0.000419548879348024	0.00715275842244271	0.00547158562145974	14025/17295/76901/18755/15251/17869/15205/22339/21926/16193/18186/18128/14725/19262/12156/16176/24088/140571/21983/233489/242620/216856/17755/211323/12168	25
GO:0051345	positive regulation of hydrolase activity	38/679	424/13456	0.000423184725918194	0.00718782415067023	0.0054984095574917	20302/244668/12122/83383/109934/20305/20303/56193/20963/17869/22339/212307/21926/106952/227059/50778/12156/12125/29815/11856/71310/19395/544817/20293/20306/20296/79201/107607/233489/215114/17196/217692/76088/19204/19229/21957/239027/11727	38
GO:0002697	regulation of immune effector process	30/679	308/13456	0.000431494831772777	0.00730172666999881	0.00558554061242162	16950/15170/18106/15216/14991/109934/171285/58185/20963/12053/21926/16193/16177/16176/19260/24088/16190/16168/12509/20296/68667/257630/213208/12772/68891/257632/19204/15040/319817/14728	30
GO:0051953	negative regulation of amine transport	5/679	14/13456	0.000440810043262746	0.00737708572401477	0.00564318739594877	21926/54393/19735/16176/12495	5
GO:0061437	renal system vasculature development	5/679	14/13456	0.000440810043262746	0.00737708572401477	0.00564318739594877	18591/15205/18186/18128/13653	5
GO:0061440	kidney vasculature development	5/679	14/13456	0.000440810043262746	0.00737708572401477	0.00564318739594877	18591/15205/18186/18128/13653	5
GO:0035270	endocrine system development	12/679	77/13456	0.000444886386790105	0.00741803235409728	0.00567450999615063	71371/12759/15205/17069/16193/12156/18576/17684/12571/19726/15364/667118	12
GO:0110148	biomineralization	15/679	111/13456	0.000448347614533676	0.00744846109984413	0.00569778681858394	15251/80752/18128/12156/20515/20750/58235/19225/22420/68667/17386/19229/12168/110789/12096	15
GO:0050767	regulation of neurogenesis	30/679	309/13456	0.000455630288221683	0.00754192389812765	0.00576928227153045	14025/29869/17295/76901/18755/15251/17869/15205/22339/21926/11302/16193/18186/18128/14725/19262/12156/16176/24088/22241/79362/140571/171207/233489/15901/242620/17755/15364/211323/12168	30
GO:0009306	protein secretion	28/679	281/13456	0.000461350819670684	0.00760894540268461	0.00582055114977354	13121/19015/11303/56193/58185/15251/50873/83433/11307/21926/16193/68428/16176/20912/24088/18576/75767/235442/68667/384783/19726/17386/216856/16534/18111/11727/667118/99889	28
GO:0040017	positive regulation of locomotion	39/679	441/13456	0.000464769750097969	0.00763766029763883	0.00584251694213978	18591/17295/20303/17311/15251/68732/20620/18792/17869/20583/107589/11504/22339/83433/212307/18186/16177/16782/18128/12156/16176/24088/12927/19225/15945/21983/20293/20296/107895/20130/13653/384783/21825/12772/12766/76088/19204/19229/12168	39
GO:0032633	interleukin-4 production	7/679	29/13456	0.000475663676285146	0.00776064894068094	0.00593659853292308	12522/171285/16364/20963/18128/213208/15040	7
GO:0042119	neutrophil activation	7/679	29/13456	0.000475663676285146	0.00776064894068094	0.00593659853292308	109934/20963/21926/16168/74732/68891/19204	7
GO:0002819	regulation of adaptive immune response	19/679	161/13456	0.000486275605876186	0.00785559541475248	0.00600922894089381	16950/15170/15216/14991/171285/58185/12053/21926/54123/16193/16177/16176/16190/68667/213208/12772/257632/15040/319817	19
GO:0032615	interleukin-12 production	9/679	47/13456	0.000487891910494547	0.00785559541475248	0.00600922894089381	14991/20963/16994/24088/21942/21825/268857/257632/232801	9
GO:0032663	regulation of interleukin-2 production	9/679	47/13456	0.000487891910494547	0.00785559541475248	0.00600922894089381	12522/171285/16364/16176/18578/257630/213208/12772/257632	9
GO:0035592	establishment of protein localization to extracellular region	28/679	282/13456	0.000488386094546343	0.00785559541475248	0.00600922894089381	13121/19015/11303/56193/58185/15251/50873/83433/11307/21926/16193/68428/16176/20912/24088/18576/75767/235442/68667/384783/19726/17386/216856/16534/18111/11727/667118/99889	28
GO:0032609	interferon-gamma production	13/679	89/13456	0.000498140777779167	0.007984284579052	0.0061076712116141	18106/14991/171285/21926/16177/16176/19260/18578/213208/12772/12475/12051/257632	13
GO:0032652	regulation of interleukin-1 production	12/679	78/13456	0.000502140190453844	0.00802014788402069	0.00613510526323662	20302/16956/171285/83433/21926/16193/24088/107607/13653/268857/257632/232801	12
GO:0051960	regulation of nervous system development	34/679	369/13456	0.000511966811965515	0.00810096321161029	0.00619692588659857	14025/29869/17295/76901/14245/18755/15251/72948/17869/15205/22339/21926/11302/16193/18186/18128/14725/19262/12156/16176/24088/22241/79362/140571/171207/21983/233489/15901/242620/216856/17755/15364/211323/12168	34
GO:0002720	positive regulation of cytokine production involved in immune response	8/679	38/13456	0.000512538972966556	0.00810096321161029	0.00619692588659857	14991/58185/16193/16177/16176/24088/257632/15040	8
GO:0032715	negative regulation of interleukin-6 production	8/679	38/13456	0.000512538972966556	0.00810096321161029	0.00619692588659857	15170/171285/57781/21926/19260/242248/268857/16598	8
GO:0019722	calcium-mediated signaling	17/679	137/13456	0.000531364263246557	0.00836944680380045	0.0064023055283905	54446/20303/20963/83433/21926/16797/14764/68667/18821/54199/233979/12772/12766/19229/211323/100504518/252837	17
GO:0071692	protein localization to extracellular region	28/679	284/13456	0.000546671744737727	0.00858086131740046	0.00656402951576189	13121/19015/11303/56193/58185/15251/50873/83433/11307/21926/16193/68428/16176/20912/24088/18576/75767/235442/68667/384783/19726/17386/216856/16534/18111/11727/667118/99889	28
GO:0001938	positive regulation of endothelial cell proliferation	11/679	68/13456	0.000550564532449083	0.00861226718800078	0.00658805380119937	18591/15370/22339/12156/140571/13655/20296/226841/12168/11727/67122	11
GO:0051272	positive regulation of cellular component movement	39/679	445/13456	0.000554515135820387	0.00864435924059726	0.00661260298952357	18591/17295/20303/17311/15251/68732/20620/18792/17869/12053/20583/107589/11504/22339/83433/212307/18186/16177/16782/18128/12156/16176/24088/12927/19225/15945/20293/20296/107895/20130/13653/384783/21825/12772/76088/19204/53374/19229/12168	39
GO:0002702	positive regulation of production of molecular mediator of immune response	12/679	79/13456	0.000565470654674274	0.00872549972907557	0.00667467234848349	18106/14991/58185/16193/16177/16176/19260/24088/16190/257630/257632/15040	12
GO:0032755	positive regulation of interleukin-6 production	12/679	79/13456	0.000565470654674274	0.00872549972907557	0.00667467234848349	16956/20963/21926/16193/16176/24088/107607/17196/257630/257632/19204/232801	12
GO:0035821	modulation of process of other organism	12/679	79/13456	0.000565470654674274	0.00872549972907557	0.00667467234848349	29869/83383/20303/20963/17869/50873/16004/12125/22241/242864/17476/68441	12
GO:0031663	lipopolysaccharide-mediated signaling pathway	9/679	48/13456	0.000574043710803654	0.008827861390467	0.00675297509010842	17079/83433/21926/12511/16176/19260/20293/12142/12475	9
GO:0031018	endocrine pancreas development	7/679	30/13456	0.000593738157272838	0.00909998684143421	0.00696114061406539	12759/15205/16193/18576/12571/19726/667118	7
GO:0001780	neutrophil homeostasis	6/679	22/13456	0.000601058228335442	0.0091812652865199	0.00702331550453423	16193/14013/26570/18578/12772/14728	6
GO:0043547	positive regulation of GTPase activity	21/679	190/13456	0.000609254556755202	0.00927534027541699	0.00709527925980007	20302/244668/109934/20305/20303/212307/106952/50778/29815/11856/71310/19395/544817/20293/20306/20296/233489/217692/76088/19229/239027	21
GO:0036293	response to decreased oxygen levels	20/679	177/13456	0.000614695308819287	0.00932697681915131	0.00713477923359369	19155/19015/11864/74747/15468/15251/18792/17869/22339/13819/18128/12156/14284/20190/19883/13653/17684/723827/11727/231002	20
GO:0002275	myeloid cell activation involved in immune response	11/679	69/13456	0.000625723149486973	0.00946276337695913	0.0072386507379014	109934/171285/20963/83433/16797/16190/74732/12772/68891/19204/14728	11
GO:0048771	tissue remodeling	17/679	139/13456	0.000628742193775071	0.00947693531809312	0.00724949172885303	109934/11622/15251/20963/22339/13819/16889/16193/215653/20750/72828/353047/17342/21817/12772/19229/12168	17
GO:1901623	regulation of lymphocyte chemotaxis	5/679	15/13456	0.000633909974524086	0.00952329440275128	0.00728495464903831	20303/15945/20293/12772/19229	5
GO:1903409	reactive oxygen species biosynthetic process	14/679	103/13456	0.000648037925057788	0.00970351524626004	0.00742281667621594	51793/14991/12759/50873/21926/16193/16176/24088/19883/19225/16598/19229/22654/53881	14
GO:0001666	response to hypoxia	19/679	165/13456	0.000660353900054431	0.00985551132146809	0.00753908783910287	19155/19015/11864/74747/15468/15251/18792/17869/22339/13819/18128/12156/14284/20190/19883/13653/17684/11727/231002	19
GO:0002292	T cell differentiation involved in immune response	10/679	59/13456	0.000667232166119573	0.00992562359534737	0.0075927210372327	16950/16364/12053/16193/16190/19883/12772/321019/12051/319817	10
GO:0043620	regulation of DNA-templated transcription in response to stress	9/679	49/13456	0.000672259847349365	0.0099678398212844	0.00762501482952752	15251/22339/13819/11910/18128/13653/17684/16598/69068	9
GO:0050868	negative regulation of T cell activation	13/679	92/13456	0.000688712368321707	0.0101786321448065	0.00778626286537323	16950/15170/15216/14991/171285/12053/19260/16190/213208/245126/12519/319817/67122	13
GO:0071363	cellular response to growth factor stimulus	37/679	420/13456	0.000692815380771147	0.0102061346707775	0.00780730124200632	18591/15216/22612/74747/15251/14281/15205/20583/15370/22339/18569/16193/18186/80752/18187/18128/14725/98878/12156/83379/22241/12927/12509/13655/14733/20296/22057/13653/12393/17684/21825/257630/213452/15901/14362/12168/12096	37
GO:0007596	blood coagulation	15/679	116/13456	0.000719349998078016	0.010562842552423	0.00808016907858091	18591/15170/279028/56193/14026/20963/18792/26570/20912/21682/72828/21825/12495/21824/14728	15
GO:0046640	regulation of alpha-beta T cell proliferation	7/679	31/13456	0.000733943908289245	0.0107424844711661	0.00821758825053587	18106/20963/19260/12772/245126/15040/12519	7
GO:0031349	positive regulation of defense response	21/679	193/13456	0.000748562215087687	0.0109213307790998	0.00835439881076271	20302/16956/14991/171285/83433/21926/18569/71398/54123/16193/16176/24088/19225/21817/107607/242864/12772/257632/18413/15040/232801	21
GO:0061448	connective tissue development	20/679	180/13456	0.000761468809847606	0.0110741406467294	0.00847129249361318	18591/19015/13549/71371/15251/20583/227731/18128/12156/68667/13653/83925/12393/21825/257630/17386/15364/210719/12168/105171	20
GO:0007519	skeletal muscle tissue development	16/679	129/13456	0.000770497527158989	0.0111697603300246	0.00854443788079764	26556/17295/12227/14281/17869/15370/11910/18128/16656/20190/60406/14733/13653/17684/242620/12180	16
GO:0034405	response to fluid shear stress	6/679	23/13456	0.000778838896141563	0.0112548401753536	0.00860952069652896	11303/20750/19225/17684/16598/19229	6
GO:0033135	regulation of peptidyl-serine phosphorylation	14/679	105/13456	0.000787555669178377	0.0113101979870429	0.00865186729746043	16156/17295/74747/22339/21926/16193/215653/29815/17763/19225/12985/227120/18413/27387	14
GO:0001890	placenta development	15/679	117/13456	0.000787639007445649	0.0113101979870429	0.00865186729746043	18591/19015/12576/17295/15251/15205/21425/13819/19143/19225/226841/12142/17684/12702/12168	15
GO:1903532	positive regulation of secretion by cell	24/679	235/13456	0.000811706247926213	0.0116191410080507	0.00888819684918873	19015/15216/15251/20963/50873/83433/11307/54393/12156/16176/24088/20750/16190/235442/68667/384783/17386/216856/68891/16534/27062/19204/18111/11727	24
GO:0051924	regulation of calcium ion transport	20/679	181/13456	0.000816680736465254	0.0116537012927581	0.00891463414033018	18591/15170/26556/20303/11622/19739/15205/107589/19260/18578/72828/19225/15945/20293/100503659/18821/279561/12766/19229/232801	20
GO:0030335	positive regulation of cell migration	37/679	424/13456	0.00082546020462364	0.0117421714107713	0.00898231038452303	18591/17295/20303/17311/15251/68732/20620/18792/17869/20583/107589/11504/22339/83433/212307/18186/16177/16782/18128/12156/16176/24088/12927/19225/15945/20293/20296/107895/20130/13653/384783/21825/12772/76088/19204/19229/12168	37
GO:0071887	leukocyte apoptotic process	13/679	94/13456	0.000847212894368588	0.0120140594864979	0.009190294325533	17311/15251/17869/16193/227059/20612/12125/26570/79201/384783/102595/76088/257632	13
GO:0006816	calcium ion transport	27/679	278/13456	0.000857273011920797	0.0121014164543563	0.00925711905258778	18591/15170/26556/68279/20303/11622/19739/76137/15205/107589/227731/19260/18578/20190/72828/19225/15945/20293/100503659/68667/18821/279561/233979/12766/16534/19229/232801	27
GO:0050817	coagulation	15/679	118/13456	0.000861348622849612	0.0121014164543563	0.00925711905258778	18591/15170/279028/56193/14026/20963/18792/26570/20912/21682/72828/21825/12495/21824/14728	15
GO:0051250	negative regulation of lymphocyte activation	15/679	118/13456	0.000861348622849612	0.0121014164543563	0.00925711905258778	16950/15170/15216/14991/171285/12053/19260/16190/242248/12142/213208/245126/12519/319817/67122	15
GO:0001894	tissue homeostasis	20/679	182/13456	0.000875305838687338	0.0122345170508408	0.00935893589958873	26556/20963/22339/13819/16889/16193/18128/269346/20750/72828/19225/353047/279561/17196/213208/12772/257632/19229/110789/381417	20
GO:0045668	negative regulation of osteoblast differentiation	8/679	41/13456	0.000876197837999586	0.0122345170508408	0.00935893589958873	11622/21926/18128/11839/22057/68667/12571/15901	8
GO:0002283	neutrophil activation involved in immune response	5/679	16/13456	0.000884023956412634	0.0122685275902144	0.00938495265665274	109934/20963/74732/68891/19204	5
GO:0045662	negative regulation of myoblast differentiation	5/679	16/13456	0.000884023956412634	0.0122685275902144	0.00938495265665274	19015/21926/18128/15945/210719	5
GO:0002369	T cell cytokine production	7/679	32/13456	0.000899096570409407	0.0124020836015261	0.00948711787851458	15216/58185/16193/16177/16176/68667/12772	7
GO:0048536	spleen development	7/679	32/13456	0.000899096570409407	0.0124020836015261	0.00948711787851458	11622/53945/12125/16468/17684/12051/319817	7
GO:0042692	muscle cell differentiation	27/679	279/13456	0.000905065826094119	0.0124467058621765	0.00952125219500507	21385/18591/13549/26556/17295/67220/15205/22339/74116/17691/18569/19735/18128/12156/21916/79362/20190/16190/19883/15945/223701/12180/110196/21957/211323/78321/667118	27
GO:0008360	regulation of cell shape	16/679	131/13456	0.000911739376706757	0.0125007157914734	0.00956256771764728	20302/15162/67220/69288/22339/106952/16193/140571/67938/20293/20296/260409/677884/244418/19229/16988	16
GO:0051051	negative regulation of transport	31/679	337/13456	0.000914943865851927	0.0125069804124864	0.00956735991224333	13121/16156/109934/11622/58185/17869/15205/50873/21926/54393/16193/19735/18128/16176/20912/24088/18576/75767/19225/100503659/18821/384783/233489/21825/279561/12495/12772/17755/18413/19229/99889	31
GO:0034765	regulation of ion transmembrane transport	33/679	368/13456	0.000982130481714178	0.0133555148762659	0.0102164562044879	15170/26556/17295/22612/11622/19739/17869/20273/83433/21926/19735/16176/19260/20912/18578/72828/15945/20296/100503659/57780/18821/384783/21825/279561/16518/16522/12856/16491/233979/12766/216856/19204/19229	33
GO:0014706	striated muscle tissue development	28/679	295/13456	0.000989700161223335	0.0133555148762659	0.0102164562044879	21385/26556/17295/12227/14281/17869/17069/15370/22339/74116/17691/19735/11910/18128/14725/12156/16656/20190/60406/14733/13653/16468/18821/17684/242620/12180/110196/211323	28
GO:0014013	regulation of gliogenesis	12/679	84/13456	0.000991721112961001	0.0133555148762659	0.0102164562044879	18755/17869/15205/21926/16193/18128/14725/19262/12156/16176/24088/15364	12
GO:0002828	regulation of type 2 immune response	6/679	24/13456	0.000994622043728937	0.0133555148762659	0.0102164562044879	58185/12053/16193/16190/12772/257632	6
GO:0032673	regulation of interleukin-4 production	6/679	24/13456	0.000994622043728937	0.0133555148762659	0.0102164562044879	12522/171285/16364/20963/213208/15040	6
GO:1904894	positive regulation of receptor signaling pathway via STAT	6/679	24/13456	0.000994622043728937	0.0133555148762659	0.0102164562044879	15205/21926/16193/18128/107895/19229	6
GO:0002449	lymphocyte mediated immunity	22/679	211/13456	0.00100392704445449	0.0134408114892848	0.0102817048391809	15170/15216/14991/171285/58185/12053/21926/54123/16193/16177/16176/22256/16190/68667/74732/213208/12772/12051/257632/18733/15040/667281	22
GO:0030308	negative regulation of cell growth	17/679	145/13456	0.00101779440691318	0.013586510675275	0.0103931591235339	14025/19015/12576/29869/55942/12053/74116/11302/18186/19735/11787/22241/171207/16323/170742/12168/629378	17
GO:0002042	cell migration involved in sprouting angiogenesis	8/679	42/13456	0.00103529418516712	0.0137797050610548	0.0105409454125357	20620/15370/22339/18186/18128/19225/13655/21825	8
GO:0048754	branching morphogenesis of an epithelial tube	14/679	108/13456	0.00104389421048821	0.0138536631082866	0.0105975204796532	17295/18612/11622/17869/22339/21926/18186/18128/12156/11839/22420/381157/15364/67122	14
GO:0045906	negative regulation of vasoconstriction	4/679	10/13456	0.00105703076428681	0.0139466783740103	0.0106686735873707	11622/15251/240672/12168	4
GO:0071639	positive regulation of monocyte chemotactic protein-1 production	4/679	10/13456	0.00105703076428681	0.0139466783740103	0.0106686735873707	68279/20963/16176/257632	4
GO:0070482	response to oxygen levels	21/679	199/13456	0.00111141798968904	0.0146218921649264	0.0111851862181057	19155/19015/11864/74747/15468/15251/18792/17869/22339/13819/18128/12156/14284/20190/19883/13653/17684/723827/11727/231002/387174	21
GO:0043087	regulation of GTPase activity	26/679	269/13456	0.00113804955045848	0.0149291111057263	0.0114201969146569	20302/244668/17295/109934/20305/20303/13998/12053/212307/106952/50778/29815/11856/140571/71310/19395/544817/20293/20306/20296/233489/217692/76088/231821/19229/239027	26
GO:0033138	positive regulation of peptidyl-serine phosphorylation	11/679	74/13456	0.00114145012491272	0.0149306924385135	0.0114214065735369	16156/17295/22339/21926/16193/29815/17763/19225/12985/18413/27387	11
GO:0070848	response to growth factor	37/679	432/13456	0.00115942793279653	0.0150166604222846	0.0114871687810835	18591/15216/22612/74747/15251/14281/15205/20583/15370/22339/18569/16193/18186/80752/18187/18128/14725/98878/12156/83379/22241/12927/12509/13655/14733/20296/22057/13653/12393/17684/21825/257630/213452/15901/14362/12168/12096	37
GO:0048863	stem cell differentiation	16/679	134/13456	0.00116451694399527	0.0150166604222846	0.0114871687810835	21385/18612/17311/15251/15205/20583/18186/18187/18128/271849/16468/12393/17684/12571/14362/104263	16
GO:0060538	skeletal muscle organ development	16/679	134/13456	0.00116451694399527	0.0150166604222846	0.0114871687810835	26556/17295/12227/14281/17869/15370/11910/18128/16656/20190/60406/14733/13653/17684/242620/12180	16
GO:1902107	positive regulation of leukocyte differentiation	16/679	134/13456	0.00116451694399527	0.0150166604222846	0.0114871687810835	20302/12522/14991/17311/14281/20963/12053/83433/21926/16193/16190/16168/13655/12142/12772/20668	16
GO:1903708	positive regulation of hemopoiesis	16/679	134/13456	0.00116451694399527	0.0150166604222846	0.0114871687810835	20302/12522/14991/17311/14281/20963/12053/83433/21926/16193/16190/16168/13655/12142/12772/20668	16
GO:0034762	regulation of transmembrane transport	33/679	372/13456	0.00117842975979432	0.015136459343902	0.0115788103574202	15170/26556/17295/22612/11622/19739/17869/20273/83433/21926/19735/16176/19260/20912/18578/72828/15945/20296/100503659/57780/18821/384783/21825/279561/16518/16522/12856/16491/233979/12766/216856/19204/19229	33
GO:0048638	regulation of developmental growth	27/679	284/13456	0.00118045761579201	0.015136459343902	0.0115788103574202	21385/14025/19015/12576/29869/11622/50873/22339/74116/11302/18186/19735/18128/12125/73094/22241/75590/171207/19374/16468/233489/17684/17755/15364/110196/211323/12168	27
GO:0045619	regulation of lymphocyte differentiation	17/679	147/13456	0.00118632643345772	0.0151689829356728	0.0116036896566473	16950/15170/12522/14991/20963/12053/15001/16193/16190/16168/13655/12142/13024/12772/20668/319817/67122	17
GO:0061298	retina vasculature development in camera-type eye	5/679	17/13456	0.00120078537434807	0.0152680866593084	0.0116795002009509	18591/15251/18186/387217/12168	5
GO:1902004	positive regulation of amyloid-beta formation	5/679	17/13456	0.00120078537434807	0.0152680866593084	0.0116795002009509	12759/11307/21926/239606/233489	5
GO:0048729	tissue morphogenesis	37/679	433/13456	0.00120854951354128	0.0152769895865533	0.0116863105985382	21385/18591/17295/18612/11622/15251/17869/15205/17069/20583/107589/22339/21926/16193/18186/18187/18128/14725/12156/11839/19143/22420/244585/15945/21817/231214/73692/17684/16323/223701/381157/59036/14362/12702/15364/12168/67122	37
GO:2000147	positive regulation of cell motility	37/679	433/13456	0.00120854951354128	0.0152769895865533	0.0116863105985382	18591/17295/20303/17311/15251/68732/20620/18792/17869/20583/107589/11504/22339/83433/212307/18186/16177/16782/18128/12156/16176/24088/12927/19225/15945/20293/20296/107895/20130/13653/384783/21825/12772/76088/19204/19229/12168	37
GO:0048008	platelet-derived growth factor receptor signaling pathway	9/679	53/13456	0.00121155387538351	0.0152769895865533	0.0116863105985382	18591/71371/22339/18186/12927/99929/56338/215114/19222	9
GO:0072593	reactive oxygen species metabolic process	23/679	228/13456	0.00122046869063823	0.015346888065705	0.0117397802519083	18591/51793/17295/14991/74747/15251/20963/18792/12759/50873/21926/16193/16176/24088/19883/19225/217203/21825/68891/16598/19229/22654/53881	23
GO:0019731	antibacterial humoral response	6/679	25/13456	0.00125353341140399	0.0157192399138043	0.0120246151222978	14038/78416/257632/15040/100034251/11727	6
GO:0002793	positive regulation of peptide secretion	16/679	135/13456	0.00126095656986225	0.0157688854560796	0.0120625920564035	19015/15216/15251/50873/83433/11307/54393/24088/235442/68667/384783/17386/216856/16534/18111/11727	16
GO:1902532	negative regulation of intracellular signal transduction	36/679	419/13456	0.00127225443276501	0.0158665813094419	0.0121373256339918	29813/15170/12122/17295/14991/74747/71962/15251/12759/12053/20583/110197/50873/106952/19735/11910/215653/16176/14013/19260/15505/70461/18576/75590/319520/75747/19883/19225/240672/242248/21825/59036/268857/235584/330177/227333	36
GO:0002285	lymphocyte activation involved in immune response	17/679	148/13456	0.00127910283383583	0.0159084046437725	0.0121693188792894	16950/18106/14991/171285/16364/17079/12053/16193/22256/16190/19883/74732/12772/321019/12051/19229/319817	17
GO:0060251	regulation of glial cell proliferation	7/679	34/13456	0.00131636940488169	0.0162829172038627	0.0124558066114092	18755/17869/15205/21926/16193/18128/16176	7
GO:1903960	negative regulation of anion transmembrane transport	7/679	34/13456	0.00131636940488169	0.0162829172038627	0.0124558066114092	17869/21926/19735/16176/20912/384783/21825	7
GO:0030855	epithelial cell differentiation	34/679	390/13456	0.00134456954044278	0.0165866681520204	0.0126881644267143	18591/12576/17295/18612/18755/15251/15205/22339/21926/80752/81879/18128/12156/16176/21916/14284/19277/17921/19143/19225/17920/12226/12142/56338/12571/19726/218630/15901/14362/22117/16598/12168/12443/667118	34
GO:0015850	organic hydroxy compound transport	17/679	149/13456	0.00137795033337979	0.0169525132906617	0.0129680219141404	11303/20493/20963/17869/17069/50873/11307/54393/74152/11832/20750/239606/69863/12495/269642/27062/53881	17
GO:0032623	interleukin-2 production	9/679	54/13456	0.00139007605514661	0.0170097478576004	0.0130118041607951	12522/171285/16364/16176/18578/257630/213208/12772/257632	9
GO:0072009	nephron epithelium development	9/679	54/13456	0.00139007605514661	0.0170097478576004	0.0130118041607951	18591/17869/15205/22339/18128/12156/19277/22420/381157	9
GO:0071695	anatomical structure maturation	20/679	189/13456	0.00139637205292722	0.0170409801204415	0.013035695642961	58864/18591/14025/19015/15251/15205/20112/22339/13819/80752/81879/18128/12156/20190/16168/19225/12393/19726/16598/19229	20
GO:0019229	regulation of vasoconstriction	8/679	44/13456	0.00142245363646615	0.0172666905418505	0.0132083554510317	18591/11622/15251/19225/240672/68667/19204/12168	8
GO:0043618	regulation of transcription from RNA polymerase II promoter in response to stress	8/679	44/13456	0.00142245363646615	0.0172666905418505	0.0132083554510317	15251/22339/13819/11910/18128/13653/17684/16598	8
GO:0042116	macrophage activation	11/679	76/13456	0.00142777600084119	0.0172852030740135	0.013222516827499	171285/20963/12759/83433/21926/24088/70461/16190/19883/217203/21825	11
GO:0010959	regulation of metal ion transport	20/679	190/13456	0.00148897411130039	0.0178681798257487	0.013668471663948	18591/15170/26556/20303/11622/19739/15205/107589/19260/18578/72828/19225/15945/20293/100503659/18821/279561/12766/19229/232801	20
GO:0007188	adenylate cyclase-modulating G protein-coupled receptor signaling pathway	14/679	112/13456	0.00149163188352033	0.0178681798257487	0.013668471663948	14686/11303/19216/54393/19735/18578/14764/15945/17201/18821/19222/208990/12766/105171	14
GO:0106106	cold-induced thermogenesis	14/679	112/13456	0.00149163188352033	0.0178681798257487	0.013668471663948	53422/14245/16364/20963/22339/13819/18128/16190/16168/227120/15901/12772/104263/105171	14
GO:0120161	regulation of cold-induced thermogenesis	14/679	112/13456	0.00149163188352033	0.0178681798257487	0.013668471663948	53422/14245/16364/20963/22339/13819/18128/16190/16168/227120/15901/12772/104263/105171	14
GO:0002920	regulation of humoral immune response	6/679	26/13456	0.00156095572068832	0.0183351110931506	0.0140256561595001	15170/21926/16176/12509/257630/257632	6
GO:0042832	defense response to protozoan	6/679	26/13456	0.00156095572068832	0.0183351110931506	0.0140256561595001	16364/16193/236573/16190/76074/12051	6
GO:0045920	negative regulation of exocytosis	6/679	26/13456	0.00156095572068832	0.0183351110931506	0.0140256561595001	109934/50873/18128/20912/100503659/12772	6
GO:0050850	positive regulation of calcium-mediated signaling	6/679	26/13456	0.00156095572068832	0.0183351110931506	0.0140256561595001	20303/20963/83433/21926/211323/100504518	6
GO:1902895	positive regulation of pri-miRNA transcription by RNA polymerase II	7/679	35/13456	0.00157496268603551	0.0183351110931506	0.0140256561595001	18591/15251/14281/21926/12156/13653/30877	7
GO:0046637	regulation of alpha-beta T cell differentiation	9/679	55/13456	0.00158916865847019	0.0183351110931506	0.0140256561595001	16950/12522/20963/12053/16193/16190/12142/12772/319817	9
GO:0002675	positive regulation of acute inflammatory response	5/679	18/13456	0.00159423733390938	0.0183351110931506	0.0140256561595001	21926/16193/16176/19225/15040	5
GO:0032753	positive regulation of interleukin-4 production	5/679	18/13456	0.00159423733390938	0.0183351110931506	0.0140256561595001	171285/16364/20963/213208/15040	5
GO:0038083	peptidyl-tyrosine autophosphorylation	5/679	18/13456	0.00159423733390938	0.0183351110931506	0.0140256561595001	20963/22339/11302/21682/19229	5
GO:0010919	regulation of inositol phosphate biosynthetic process	4/679	11/13456	0.00159505799492259	0.0183351110931506	0.0140256561595001	18106/56193/19204/19229	4
GO:0031650	regulation of heat generation	4/679	11/13456	0.00159505799492259	0.0183351110931506	0.0140256561595001	21926/16176/19225/105171	4
GO:0034154	toll-like receptor 7 signaling pathway	4/679	11/13456	0.00159505799492259	0.0183351110931506	0.0140256561595001	171285/58185/71398/19260	4
GO:0035633	maintenance of blood-brain barrier	4/679	11/13456	0.00159505799492259	0.0183351110931506	0.0140256561595001	22339/19225/279561/17196	4
GO:0048711	positive regulation of astrocyte differentiation	4/679	11/13456	0.00159505799492259	0.0183351110931506	0.0140256561595001	15205/18128/12156/16176	4
GO:0072111	cell proliferation involved in kidney development	4/679	11/13456	0.00159505799492259	0.0183351110931506	0.0140256561595001	18591/17869/12156/13653	4
GO:2000343	positive regulation of chemokine (C-X-C motif) ligand 2 production	4/679	11/13456	0.00159505799492259	0.0183351110931506	0.0140256561595001	68279/16956/21926/17196	4
GO:0051148	negative regulation of muscle cell differentiation	8/679	45/13456	0.00165493780810996	0.0189011151566116	0.014458627540947	18591/74116/18569/19735/18128/12156/79362/667118	8
GO:1902893	regulation of pri-miRNA transcription by RNA polymerase II	8/679	45/13456	0.00165493780810996	0.0189011151566116	0.014458627540947	18591/19015/15251/14281/21926/12156/13653/30877	8
GO:0071346	cellular response to interferon-gamma	12/679	89/13456	0.00165675416245343	0.0189011151566116	0.014458627540947	20302/20305/20303/14026/20912/24088/236573/76074/20293/20306/20296/74732	12
GO:0010594	regulation of endothelial cell migration	15/679	126/13456	0.00168984625274034	0.0192304503561851	0.014710556326487	18591/17295/15251/20620/20583/22339/21926/18186/18128/12927/19225/20130/21825/19229/12168	15
GO:0051047	positive regulation of secretion	24/679	248/13456	0.0017058674316816	0.0193643604713582	0.0148129924242098	19015/15216/15251/20963/50873/83433/11307/54393/12156/16176/24088/20750/16190/235442/68667/384783/17386/216856/68891/16534/27062/19204/18111/11727	24
GO:0071407	cellular response to organic cyclic compound	31/679	351/13456	0.00175806974826096	0.019907297248965	0.0152283182174582	18591/12576/83383/11622/19216/74747/15468/19739/12759/67731/20583/21926/12156/16176/18578/20750/20190/19883/99929/20293/74191/68667/13653/235283/16323/77128/104263/15364/224829/723827/442846	31
GO:0035051	cardiocyte differentiation	14/679	114/13456	0.00176957182823175	0.0199483060417966	0.0152596883697769	21385/18591/17295/15205/22339/74116/17691/18569/19735/18128/12156/17684/110196/211323	14
GO:0070555	response to interleukin-1	11/679	78/13456	0.00177045598437738	0.0199483060417966	0.0152596883697769	20302/20305/20303/16193/16177/16176/19883/20293/20306/20296/13653	11
GO:0031334	positive regulation of protein-containing complex assembly	20/679	193/13456	0.00179877097223704	0.0202172974459828	0.0154654564682525	12576/12122/17295/11303/12124/11622/56193/14026/68732/20963/72948/12759/22339/21926/12125/260409/12985/17755/19229/99889	20
GO:1903038	negative regulation of leukocyte cell-cell adhesion	13/679	102/13456	0.00181979665428653	0.0204032373653011	0.0156076933688873	16950/15170/15216/14991/171285/12053/19260/16190/213208/245126/12519/319817/67122	13
GO:0023061	signal release	32/679	367/13456	0.00183500314492197	0.0205231801368177	0.0156994449848749	19015/16156/15216/11303/19157/72472/15251/20963/50873/21926/54393/16193/14725/16176/20912/20750/18576/75767/17920/235442/68667/384783/74732/19726/16323/12495/216856/27062/15364/18413/18111/667118	32
GO:0090276	regulation of peptide hormone secretion	17/679	153/13456	0.00184043634390334	0.0205334956800196	0.0157073359794434	19015/15216/15251/50873/21926/54393/16193/16176/18576/235442/68667/384783/19726/216856/15364/18111/667118	17
GO:0010720	positive regulation of cell development	25/679	264/13456	0.0018649120942049	0.0206765890085185	0.015816796882846	14025/17295/76901/18755/15251/68732/17869/15205/22339/21926/16193/18186/18128/14725/19262/12156/16176/24088/140571/233489/19726/242620/17755/211323/12168	25
GO:0045661	regulation of myoblast differentiation	7/679	36/13456	0.00187143116685185	0.0206765890085185	0.015816796882846	19015/21926/18128/15945/12226/12180/210719	7
GO:0061844	antimicrobial humoral immune response mediated by antimicrobial peptide	7/679	36/13456	0.00187143116685185	0.0206765890085185	0.015816796882846	78416/15945/20296/257630/257632/20310/11727	7
GO:1900744	regulation of p38MAPK cascade	7/679	36/13456	0.00187143116685185	0.0206765890085185	0.015816796882846	17295/17873/22339/12156/16176/19260/15505	7
GO:0090279	regulation of calcium ion import	6/679	27/13456	0.00192250040170824	0.021189399100668	0.0162090769181875	18591/26556/15205/20293/18821/279561	6
GO:0072006	nephron development	11/679	79/13456	0.00196538008182936	0.0216096863103556	0.0165305805001056	18591/11622/17869/15205/22339/18128/12156/19277/22420/13653/381157	11
GO:0002009	morphogenesis of an epithelium	32/679	369/13456	0.00200054216610602	0.0219349059046418	0.0167793610055858	21385/18591/17295/18612/11622/15251/17869/15205/20583/22339/21926/16193/18186/18128/14725/12156/11839/19143/22420/244585/15945/21817/231214/73692/17684/223701/381157/59036/14362/12702/15364/67122	32
GO:0030278	regulation of ossification	12/679	91/13456	0.00200941471050871	0.0219349059046418	0.0167793610055858	58185/15251/80752/18128/12156/68667/12393/19229/20148/12168/110789/12096	12
GO:0048661	positive regulation of smooth muscle cell proliferation	12/679	91/13456	0.00200941471050871	0.0219349059046418	0.0167793610055858	18591/15251/17869/11504/22339/21926/16193/19225/21817/13653/21825/19204	12
GO:0045445	myoblast differentiation	9/679	57/13456	0.00205581143026606	0.0223876881114142	0.0171257220128938	21385/19015/13819/21926/18128/15945/12226/12180/210719	9
GO:0051968	positive regulation of synaptic transmission	glutamatergic	5/679	19/13456	0.00207473174534992	0.022486140249602	0.0172010341193422	19225/20296/12772/216856/19229	5
GO:1901522	positive regulation of transcription from RNA polymerase II promoter involved in cellular response to chemical stimulus	5/679	19/13456	0.00207473174534992	0.022486140249602	0.0172010341193422	15251/22339/18128/12156/12393	5
GO:0042060	wound healing	24/679	252/13456	0.00211235138048101	0.0228394857100939	0.017471329832807	18591/19015/15170/279028/56193/15251/14026/20963/18792/20583/107589/22339/21926/26570/20912/21682/72828/20296/21825/223701/12495/12772/21824/14728	24
GO:0060560	developmental growth involved in morphogenesis	20/679	196/13456	0.00216158192153725	0.0233164002531696	0.0178361511510233	21385/14025/29869/12032/11622/76901/50873/22339/11302/18186/18187/18128/11839/22241/171207/233489/235542/17755/211323/12168	20
GO:0051056	regulation of small GTPase mediated signal transduction	22/679	224/13456	0.00216847299277614	0.0233354351373924	0.0178507121067649	244668/17295/11303/19157/109934/17311/13998/56784/12053/212307/106952/18186/226751/18128/17207/67168/101497/72754/217692/244418/263406/211323	22
GO:0002456	T cell mediated immunity	12/679	92/13456	0.00220752006183676	0.0235543676233133	0.0180181870543707	15216/14991/58185/16193/16177/16176/68667/74732/213208/12772/257632/15040	12
GO:0043534	blood vessel endothelial cell migration	12/679	92/13456	0.00220752006183676	0.0235543676233133	0.0180181870543707	18591/15251/20620/15370/22339/21926/18186/18128/19225/13655/21825/19229	12
GO:0042088	T-helper 1 type immune response	7/679	37/13456	0.00220937872513324	0.0235543676233133	0.0180181870543707	171285/22339/16177/16176/16190/12772/12051	7
GO:0061614	pri-miRNA transcription by RNA polymerase II	8/679	47/13456	0.00220951559208146	0.0235543676233133	0.0180181870543707	18591/19015/15251/14281/21926/12156/13653/30877	8
GO:1990845	adaptive thermogenesis	14/679	117/13456	0.00226615413507489	0.0239888807952054	0.0183505729512856	53422/14245/16364/20963/22339/13819/18128/16190/16168/227120/15901/12772/104263/105171	14
GO:0007204	positive regulation of cytosolic calcium ion concentration	20/679	197/13456	0.00229548206359629	0.0239888807952054	0.0183505729512856	20302/15170/14686/19216/16176/20190/72828/67168/15945/21817/68667/18821/19222/54199/233979/12772/12766/20310/19229/252837	20
GO:0030168	platelet activation	10/679	69/13456	0.00229682418714087	0.0239888807952054	0.0183505729512856	18591/15170/56193/14026/20963/26570/20912/21682/72828/12495	10
GO:0051817	modulation of process of other organism involved in symbiotic interaction	10/679	69/13456	0.00229682418714087	0.0239888807952054	0.0183505729512856	29869/83383/20303/17869/50873/16004/12125/22241/242864/68441	10
GO:0070167	regulation of biomineral tissue development	10/679	69/13456	0.00229682418714087	0.0239888807952054	0.0183505729512856	15251/80752/18128/12156/22420/68667/19229/12168/110789/12096	10
GO:0002830	positive regulation of type 2 immune response	4/679	12/13456	0.00229770475103461	0.0239888807952054	0.0183505729512856	58185/16193/16190/257632	4
GO:0002922	positive regulation of humoral immune response	4/679	12/13456	0.00229770475103461	0.0239888807952054	0.0183505729512856	21926/16176/257630/257632	4
GO:0048245	eosinophil chemotaxis	4/679	12/13456	0.00229770475103461	0.0239888807952054	0.0183505729512856	20303/20293/20306/20296	4
GO:2001028	positive regulation of endothelial cell chemotaxis	4/679	12/13456	0.00229770475103461	0.0239888807952054	0.0183505729512856	18591/17295/20583/22339	4
GO:0043405	regulation of MAP kinase activity	21/679	211/13456	0.0023038054864851	0.023997534495378	0.0183571926997295	18591/15170/17295/17873/17311/20963/16012/22339/21926/19735/12156/16176/19260/75590/319520/240672/21825/235584/257632/19229/330177	21
GO:0044344	cellular response to fibroblast growth factor stimulus	9/679	58/13456	0.00232690320321757	0.0241277070183288	0.0184567696828767	18591/15370/80752/83379/13655/14733/12393/21825/213452	9
GO:1904892	regulation of receptor signaling pathway via STAT	9/679	58/13456	0.00232690320321757	0.0241277070183288	0.0184567696828767	15205/21926/16193/18128/107895/12702/12051/15364/19229	9
GO:0001562	response to protozoan	6/679	28/13456	0.00234397741779768	0.0241945242762246	0.0185078823202643	16364/16193/236573/16190/76074/12051	6
GO:0021545	cranial nerve development	6/679	28/13456	0.00234397741779768	0.0241945242762246	0.0185078823202643	15205/18186/18187/17684/78286/16658	6
GO:0002440	production of molecular mediator of immune response	18/679	170/13456	0.00235456388404796	0.0242488117651274	0.0185494101653505	18106/15216/14991/58185/12053/21926/16193/16177/16176/19260/24088/22256/16190/68667/257630/12772/257632/15040	18
GO:0071772	response to BMP	13/679	105/13456	0.00236656539773857	0.0242626254290675	0.0185599770880019	15216/15205/18569/18128/14725/12156/22057/13653/12393/15901/14362/12168/12096	13
GO:0071773	cellular response to BMP stimulus	13/679	105/13456	0.00236656539773857	0.0242626254290675	0.0185599770880019	15216/15205/18569/18128/14725/12156/22057/13653/12393/15901/14362/12168/12096	13
GO:0070997	neuron death	29/679	328/13456	0.00239882936914896	0.0245381377266653	0.0187707334196209	20302/18008/17865/74747/12227/15251/14281/18792/12759/57781/50873/22339/21926/11302/16193/18186/209456/12125/16176/26570/15505/20293/79201/12985/13653/233489/14362/20310/19229	29
GO:0060485	mesenchyme development	19/679	184/13456	0.00240937699763859	0.0245907715095311	0.0188109962430693	21385/16950/17311/15251/17869/15205/20583/22339/18569/16193/18186/18187/18128/12156/16176/17684/21825/12168/629378	19
GO:0007422	peripheral nervous system development	8/679	48/13456	0.00253660996833702	0.0258314285813649	0.0197600512781322	380684/13655/14733/17684/225608/18413/211323/53881	8
GO:0110149	regulation of biomineralization	10/679	70/13456	0.00256142246652737	0.0259189898273032	0.0198270322700765	15251/80752/18128/12156/22420/68667/19229/12168/110789/12096	10
GO:0002699	positive regulation of immune effector process	19/679	185/13456	0.00256229029487839	0.0259189898273032	0.0198270322700765	18106/14991/58185/20963/21926/16193/16177/16176/19260/24088/16190/20296/257630/12772/68891/257632/19204/15040/14728	19
GO:0030072	peptide hormone secretion	19/679	185/13456	0.00256229029487839	0.0259189898273032	0.0198270322700765	19015/15216/72472/15251/50873/21926/54393/16193/16176/20912/18576/235442/68667/384783/19726/216856/15364/18111/667118	19
GO:0001974	blood vessel remodeling	7/679	38/13456	0.00259253608852571	0.0261089032632058	0.0199723087583676	109934/11622/22339/13819/21817/12772/12168	7
GO:0051966	regulation of synaptic transmission	glutamatergic	7/679	38/13456	0.00259253608852571	0.0261089032632058	0.0199723087583676	26556/50873/19225/20296/12772/216856/19229	7
GO:0003148	outflow tract septum morphogenesis	5/679	20/13456	0.00265282930329239	0.0263661113287925	0.0201690630551396	21385/18186/18187/14725/12168	5
GO:0010575	positive regulation of vascular endothelial growth factor production	5/679	20/13456	0.00265282930329239	0.0263661113287925	0.0201690630551396	15251/16193/16176/19883/19225	5
GO:0046427	positive regulation of receptor signaling pathway via JAK-STAT	5/679	20/13456	0.00265282930329239	0.0263661113287925	0.0201690630551396	15205/21926/16193/18128/19229	5
GO:0060252	positive regulation of glial cell proliferation	5/679	20/13456	0.00265282930329239	0.0263661113287925	0.0201690630551396	18755/17869/21926/16193/16176	5
GO:1903306	negative regulation of regulated secretory pathway	5/679	20/13456	0.00265282930329239	0.0263661113287925	0.0201690630551396	109934/18128/20912/100503659/12772	5
GO:1904996	positive regulation of leukocyte adhesion to vascular endothelial cell	5/679	20/13456	0.00265282930329239	0.0263661113287925	0.0201690630551396	54446/21926/16193/12772/19204	5
GO:0007610	behavior	37/679	454/13456	0.00275451869983148	0.0273171440558451	0.0208965665842049	29813/26556/17295/13411/12227/15251/20620/20273/50873/16193/16176/26570/24088/21916/73094/15572/19225/17920/21983/231380/13653/17201/233489/21825/211612/246228/208990/242864/77128/216856/78286/13134/18413/18733/211323/105171/620246	37
GO:0032872	regulation of stress-activated MAPK cascade	16/679	146/13456	0.0028460026706689	0.028163052514967	0.0215436540836904	17295/17873/22339/21926/215653/12156/16176/14013/19260/15505/79201/107607/59036/257632/19229/330177	16
GO:0010466	negative regulation of peptidase activity	14/679	120/13456	0.00287257608139262	0.028302957408007	0.0216506759563609	14038/15370/22339/74116/21926/16193/209378/20713/19225/233489/21825/223701/78709/15511	14
GO:0010634	positive regulation of epithelial cell migration	14/679	120/13456	0.00287257608139262	0.028302957408007	0.0216506759563609	18591/17295/15251/20620/20583/22339/212307/18186/12927/19225/20130/21825/19229/12168	14
GO:0003231	cardiac ventricle development	12/679	95/13456	0.00289951251064137	0.028445217561292	0.0217594995127079	11622/15251/15205/17069/18128/14725/12142/73692/17684/381157/14362/12168	12
GO:0022612	gland morphogenesis	12/679	95/13456	0.00289951251064137	0.028445217561292	0.0217594995127079	21385/18591/17295/18612/18792/20583/21926/16193/18186/18128/11839/21817	12
GO:0002065	columnar/cuboidal epithelial cell differentiation	9/679	60/13456	0.00295396210257003	0.0288550117830446	0.0220729763616482	15251/15205/80752/18128/12156/12142/12571/19726/667118	9
GO:0071774	response to fibroblast growth factor	9/679	60/13456	0.00295396210257003	0.0288550117830446	0.0220729763616482	18591/15370/80752/83379/13655/14733/12393/21825/213452	9
GO:0050853	B cell receptor signaling pathway	7/679	39/13456	0.00302474818851365	0.0294202003293037	0.0225053239037408	15170/18755/20963/227059/21682/12927/17060	7
GO:1905953	negative regulation of lipid localization	7/679	39/13456	0.00302474818851365	0.0294202003293037	0.0225053239037408	19015/11307/21926/16176/69863/384783/21825	7
GO:0007423	sensory organ development	32/679	379/13456	0.00303544001426887	0.0294612429529891	0.022536719935364	21385/18591/12576/14686/109934/11622/15251/17869/15205/22339/18186/227731/18128/12156/12125/29815/21916/17921/58235/244585/17920/17342/12142/231214/17684/16323/235542/387217/15040/12168/110789/16658	32
GO:0007229	integrin-mediated signaling pathway	10/679	72/13456	0.00316371001617957	0.0302915059348088	0.0231718392452935	16950/56193/20963/18186/19262/21682/16797/12927/68891/19229	10
GO:0002710	negative regulation of T cell mediated immunity	4/679	13/13456	0.00318752885386059	0.0302915059348088	0.0231718392452935	15216/14991/213208/257632	4
GO:0021783	preganglionic parasympathetic fiber development	4/679	13/13456	0.00318752885386059	0.0302915059348088	0.0231718392452935	15205/18186/18187/78286	4
GO:0032740	positive regulation of interleukin-17 production	4/679	13/13456	0.00318752885386059	0.0302915059348088	0.0231718392452935	16193/16168/257632/18413	4
GO:0048486	parasympathetic nervous system development	4/679	13/13456	0.00318752885386059	0.0302915059348088	0.0231718392452935	15205/18186/18187/78286	4
GO:0060749	mammary gland alveolus development	4/679	13/13456	0.00318752885386059	0.0302915059348088	0.0231718392452935	15251/22339/11839/12443	4
GO:0061377	mammary gland lobule development	4/679	13/13456	0.00318752885386059	0.0302915059348088	0.0231718392452935	15251/22339/11839/12443	4
GO:0072012	glomerulus vasculature development	4/679	13/13456	0.00318752885386059	0.0302915059348088	0.0231718392452935	18591/15205/18128/13653	4
GO:0090336	positive regulation of brown fat cell differentiation	4/679	13/13456	0.00318752885386059	0.0302915059348088	0.0231718392452935	14013/19225/242864/20668	4
GO:2000192	negative regulation of fatty acid transport	4/679	13/13456	0.00318752885386059	0.0302915059348088	0.0231718392452935	21926/16176/384783/21825	4
GO:0035023	regulation of Rho protein signal transduction	13/679	109/13456	0.00329840255622386	0.0312635304999334	0.0239154007246739	17295/11303/109934/13998/12053/106952/18186/17207/67168/101497/72754/244418/263406	13
GO:0014031	mesenchymal cell development	8/679	50/13456	0.00330354968595518	0.0312635304999334	0.0239154007246739	17311/15251/15205/20583/18186/18187/18128/17684	8
GO:0002825	regulation of T-helper 1 type immune response	5/679	21/13456	0.00333920183180366	0.0315353666771168	0.0241233449652905	171285/16177/16176/16190/12772	5
GO:0043542	endothelial cell migration	17/679	162/13456	0.00337173875719544	0.0317767180595313	0.0243079695081236	18591/17295/15251/20620/20583/15370/22339/21926/18186/18128/12927/19225/13655/20130/21825/19229/12168	17
GO:0002673	regulation of acute inflammatory response	6/679	30/13456	0.00339076997472645	0.0318242988143398	0.0243443669590778	21926/16193/16176/19225/213208/15040	6
GO:0045622	regulation of T-helper cell differentiation	6/679	30/13456	0.00339076997472645	0.0318242988143398	0.0243443669590778	16950/12053/16193/16190/12772/319817	6
GO:0070302	regulation of stress-activated protein kinase signaling cascade	16/679	149/13456	0.00349000726448883	0.0326882984937308	0.0250052935476046	17295/17873/22339/21926/215653/12156/16176/14013/19260/15505/79201/107607/59036/257632/19229/330177	16
GO:0060840	artery development	10/679	73/13456	0.00350443992564391	0.0327404532672504	0.0250451899472908	21385/15205/107589/22339/18186/18128/14725/12142/17684/12168	10
GO:1902930	regulation of alcohol biosynthetic process	7/679	40/13456	0.00350996071933616	0.0327404532672504	0.0250451899472908	18106/56193/11307/12156/19204/19229/110196	7
GO:0002040	sprouting angiogenesis	11/679	85/13456	0.00353329070617717	0.032756699174172	0.025057617442457	20620/15370/22339/18186/18128/19225/13655/21825/16598/19229/67122	11
GO:0014902	myotube differentiation	11/679	85/13456	0.00353329070617717	0.032756699174172	0.025057617442457	13549/26556/17295/67220/17691/18128/79362/20190/16190/15945/12180	11
GO:0046620	regulation of organ growth	11/679	85/13456	0.00353329070617717	0.032756699174172	0.025057617442457	21385/11622/74116/19735/18128/12125/75590/19374/16468/17684/110196	11
GO:0002706	regulation of lymphocyte mediated immunity	15/679	136/13456	0.00357283166770866	0.0330559547792883	0.0252865364928974	15170/15216/14991/171285/58185/12053/21926/16193/16177/16176/68667/213208/12772/257632/15040	15
GO:0060420	regulation of heart growth	9/679	62/13456	0.00370732895888977	0.0341874393726318	0.0261520787727005	21385/11622/74116/19735/18128/75590/16468/17684/110196	9
GO:0021700	developmental maturation	22/679	234/13456	0.00371014829746927	0.0341874393726318	0.0261520787727005	58864/18591/14025/19015/12032/15251/15205/20112/22339/13819/80752/81879/18128/12156/20190/16168/19225/12393/233489/19726/16598/19229	22
GO:0031016	pancreas development	8/679	51/13456	0.00374888088206867	0.0344745571215688	0.0263717128290976	17295/12759/15205/16193/18576/12571/19726/667118	8
GO:0030856	regulation of epithelial cell differentiation	12/679	98/13456	0.00375784098884293	0.0344872826234134	0.026381447349517	12576/18612/18755/15205/22339/21926/18128/16176/12226/19726/15901/12443	12
GO:0031347	regulation of defense response	34/679	416/13456	0.00383957676289731	0.0351665058847254	0.0269010270711941	20302/19015/16956/14991/109934/171285/12053/57781/83433/21926/18569/71398/54123/16193/16177/16176/19260/24088/16168/19883/23959/19225/21817/107607/213208/13024/242864/12772/268857/12702/257632/18413/15040/232801	34
GO:0001892	embryonic placenta development	10/679	74/13456	0.00387365708200816	0.0354074036893597	0.0270853046444367	18591/15251/15205/21425/13819/19143/226841/12142/17684/12702	10
GO:0090066	regulation of anatomical structure size	33/679	401/13456	0.00392603191645988	0.0358142230134777	0.0273965058108834	18591/14025/29869/11622/56193/15251/14026/68732/22339/21926/11302/18186/19735/24088/21916/22241/171207/19225/240672/260409/101497/12985/68667/233489/279561/17755/16534/16598/19204/19229/211323/12168/99889	33
GO:0033028	myeloid cell apoptotic process	6/679	31/13456	0.00402840823067138	0.0366746285320322	0.0280546830043388	17311/16193/26570/23845/102595/257632	6
GO:0043370	regulation of CD4-positive	alpha-beta T cell differentiation	7/679	41/13456	0.00405220601843486	0.0367443063663655	0.0281079838728927	16950/12522/12053/16193/16190/12772/319817	7
GO:0060612	adipose tissue development	7/679	41/13456	0.00405220601843486	0.0367443063663655	0.0281079838728927	19015/13549/71371/227731/68667/15364/105171	7
GO:0098657	import into cell	17/679	165/13456	0.00407211890624328	0.0368514617519273	0.028189953629492	15216/50873/83433/21926/227059/19735/68428/14725/26570/17920/68667/384783/21825/279561/16518/16522/269642	17
GO:1903522	regulation of blood circulation	15/679	138/13456	0.00410394039780834	0.0369695866718012	0.0282803146587546	18591/11622/15251/13819/21926/19735/18578/19225/240672/68667/17201/18821/16518/19204/12168	15
GO:0006909	phagocytosis	18/679	179/13456	0.00410953665552096	0.0369695866718012	0.0282803146587546	15162/17295/11303/109934/69288/20963/83433/21926/16176/24088/17921/16168/20296/21817/21825/12772/104759/257632	18
GO:0007548	sex differentiation	18/679	179/13456	0.00410953665552096	0.0369695866718012	0.0282803146587546	12124/11622/71371/17311/380684/78925/11504/22339/14725/12125/99929/17684/16323/381157/242620/13134/15364/12443	18
GO:0050776	regulation of immune response	39/679	497/13456	0.00412342471740571	0.0369920349443174	0.0282974867255115	16950/15170/15216/14991/109934/171285/58185/18755/20963/12053/83433/21926/71398/54123/16193/227059/16177/16176/19260/24088/18578/21682/16190/16168/12927/12509/68667/257630/213208/12772/268857/68891/16534/257632/19204/17060/15040/319817/14728	39
GO:0060021	roof of mouth development	9/679	63/13456	0.00413650934223606	0.0369920349443174	0.0282974867255115	21385/16950/71371/20583/99929/73692/16323/14362/20148	9
GO:2000027	regulation of animal organ morphogenesis	9/679	63/13456	0.00413650934223606	0.0369920349443174	0.0282974867255115	17295/20583/22339/21926/12156/12393/17684/59036/14362	9
GO:0044003	modulation by symbiont of host process	5/679	22/13456	0.00414453818576491	0.0369920349443174	0.0282974867255115	29869/17869/12125/22241/68441	5
GO:0030178	negative regulation of Wnt signaling pathway	13/679	112/13456	0.00417710368292541	0.0371370624310087	0.0284084271856852	20583/50873/18128/12156/56811/19277/13653/235542/59036/14362/15364/20668/629378	13
GO:0062013	positive regulation of small molecule metabolic process	13/679	112/13456	0.00417710368292541	0.0371370624310087	0.0284084271856852	19015/18106/15251/17869/50873/83433/11307/21926/16176/19225/384783/19204/110196	13
GO:0043491	protein kinase B signaling	16/679	152/13456	0.00424949287305882	0.0373771205998275	0.0285920624697599	17295/14991/22339/21926/16193/14725/16176/75747/21983/20293/242248/12985/20130/21825/18413/211323	16
GO:0045165	cell fate commitment	16/679	152/13456	0.00424949287305882	0.0373771205998275	0.0285920624697599	21385/16950/16364/15205/13819/16193/18128/12156/19374/22420/17342/12142/12393/242620/211323/20668	16
GO:0010818	T cell chemotaxis	4/679	14/13456	0.00428621637809973	0.0373771205998275	0.0285920624697599	15945/12772/12766/321019	4
GO:0031649	heat generation	4/679	14/13456	0.00428621637809973	0.0373771205998275	0.0285920624697599	21926/16176/19225/105171	4
GO:0034104	negative regulation of tissue remodeling	4/679	14/13456	0.00428621637809973	0.0373771205998275	0.0285920624697599	109934/22339/16193/72828	4
GO:0071605	monocyte chemotactic protein-1 production	4/679	14/13456	0.00428621637809973	0.0373771205998275	0.0285920624697599	68279/20963/16176/257632	4
GO:0071637	regulation of monocyte chemotactic protein-1 production	4/679	14/13456	0.00428621637809973	0.0373771205998275	0.0285920624697599	68279/20963/16176/257632	4
GO:0072567	chemokine (C-X-C motif) ligand 2 production	4/679	14/13456	0.00428621637809973	0.0373771205998275	0.0285920624697599	68279/16956/21926/17196	4
GO:1902916	positive regulation of protein polyubiquitination	4/679	14/13456	0.00428621637809973	0.0373771205998275	0.0285920624697599	50873/19260/211949/257632	4
GO:2000341	regulation of chemokine (C-X-C motif) ligand 2 production	4/679	14/13456	0.00428621637809973	0.0373771205998275	0.0285920624697599	68279/16956/21926/17196	4
GO:0048469	cell maturation	15/679	139/13456	0.00439269466967416	0.0382324017903571	0.0292463197489828	58864/18591/14025/15251/15205/20112/22339/13819/80752/81879/16168/12393/19726/16598/19229	15
GO:0009725	response to hormone	38/679	483/13456	0.0044069272690526	0.0382830781082584	0.0292850851868742	19015/83383/16956/74747/15468/14245/67731/15370/64898/21926/16193/18128/14725/19262/16176/20912/29815/20750/11839/18576/12927/75747/16909/235442/13653/384783/17684/16323/77128/17386/12702/104263/15364/224829/12443/11727/12096/442846	38
GO:0071900	regulation of protein serine/threonine kinase activity	28/679	327/13456	0.00442416410457648	0.0383596095314898	0.0293436287878476	18591/12576/15170/83383/17295/17873/23834/17311/20963/16012/22339/21926/19735/12156/16176/19260/12452/75590/319520/240672/21825/218630/235584/257632/69068/19229/330177/12443	28
GO:0097696	receptor signaling pathway via STAT	12/679	100/13456	0.00443584826089422	0.0383877971170921	0.0293651912088014	15468/15205/21926/16193/18128/16168/107895/12702/12051/15364/18413/19229	12
GO:0007178	transmembrane receptor protein serine/threonine kinase signaling pathway	22/679	238/13456	0.00454277526747675	0.03923854462534	0.0300159803951125	15216/76901/14281/15205/18569/18128/14725/12156/242083/20296/22057/13653/83925/677884/12393/17684/21825/16323/257630/15901/14362/12168	22
GO:0045621	positive regulation of lymphocyte differentiation	11/679	88/13456	0.00462675819636915	0.0398882638444552	0.0305129906570756	12522/14991/20963/12053/16193/16190/16168/13655/12142/12772/20668	11
GO:2000401	regulation of lymphocyte migration	7/679	42/13456	0.00465558838508841	0.0400609420206473	0.0306450828332951	20303/57781/15945/20293/12772/76088/19229	7
GO:0090049	regulation of cell migration involved in sprouting angiogenesis	6/679	32/13456	0.00475055707534722	0.0408010109565671	0.0312112071603746	20620/22339/18186/18128/19225/21825	6
GO:0046425	regulation of receptor signaling pathway via JAK-STAT	8/679	53/13456	0.00477747455401954	0.0409549231071506	0.0313289440473717	15205/21926/16193/18128/12702/12051/15364/19229	8
GO:0030509	BMP signaling pathway	12/679	101/13456	0.00480976724122198	0.0411542490263956	0.0314814207241043	15216/15205/18569/18128/14725/12156/22057/13653/12393/15901/14362/12168	12
GO:0060562	epithelial tube morphogenesis	23/679	255/13456	0.00507870426834518	0.0432180889533397	0.0330601790439478	21385/17295/18612/11622/15251/17869/15205/22339/21926/18186/18128/14725/12156/11839/19143/22420/15945/231214/17684/381157/14362/15364/67122	23
GO:0036003	positive regulation of transcription from RNA polymerase II promoter in response to stress	5/679	23/13456	0.00507945465510473	0.0432180889533397	0.0330601790439478	15251/22339/11910/18128/16598	5
GO:1902993	positive regulation of amyloid precursor protein catabolic process	5/679	23/13456	0.00507945465510473	0.0432180889533397	0.0330601790439478	12759/11307/21926/239606/233489	5
GO:0060284	regulation of cell development	33/679	408/13456	0.0051007320444553	0.0433181572133592	0.0331367274215596	14025/29869/17295/76901/18755/15251/68732/17869/15205/22339/21926/11302/16193/18186/18128/14725/19262/12156/16176/24088/22241/79362/140571/171207/12927/233489/19726/15901/242620/17755/15364/211323/12168	33
GO:0051896	regulation of protein kinase B signaling	14/679	128/13456	0.00516339653948686	0.0437686797909576	0.0334813598992895	17295/14991/22339/21926/16193/14725/75747/21983/242248/12985/20130/21825/18413/211323	14
GO:0051146	striated muscle cell differentiation	20/679	212/13456	0.0053037748095201	0.0448750612136348	0.034327699217164	13549/26556/17295/67220/22339/74116/17691/19735/18128/12156/21916/79362/20190/16190/15945/12180/110196/21957/211323/78321	20
GO:0035924	cellular response to vascular endothelial growth factor stimulus	7/679	43/13456	0.00532426895279499	0.0448816153205977	0.0343327128573993	18591/15370/22339/18186/18187/18128/13655	7
GO:0038066	p38MAPK cascade	7/679	43/13456	0.00532426895279499	0.0448816153205977	0.0343327128573993	17295/17873/22339/12156/16176/19260/15505	7
GO:0003281	ventricular septum development	8/679	54/13456	0.00536658733643222	0.0450714124639105	0.0344779003863231	15205/18128/14725/12142/73692/17684/14362/12168	8
GO:0014068	positive regulation of phosphatidylinositol 3-kinase signaling	8/679	54/13456	0.00536658733643222	0.0450714124639105	0.0344779003863231	18591/19015/15170/22339/21926/12985/18413/211323	8
GO:0048588	developmental cell growth	19/679	198/13456	0.00540996959281965	0.0453520839530664	0.0346926033014392	14025/29869/12032/15468/76901/50873/22339/74116/11302/18186/18187/19735/22241/171207/233489/17755/110196/211323/12168	19
GO:0048640	negative regulation of developmental growth	11/679	90/13456	0.00549388930483571	0.0458865763589214	0.0351014694744501	14025/12576/29869/74116/11302/18186/19735/22241/171207/16468/17684	11
GO:0090090	negative regulation of canonical Wnt signaling pathway	11/679	90/13456	0.00549388930483571	0.0458865763589214	0.0351014694744501	20583/50873/18128/56811/19277/13653/235542/59036/14362/20668/629378	11
GO:0003018	vascular process in circulatory system	14/679	129/13456	0.00553180132238106	0.0460476038461122	0.0352246493208166	18591/109934/20303/11622/15251/22339/21926/19735/19225/240672/68667/16598/19204/12168	14
GO:0001754	eye photoreceptor cell differentiation	6/679	33/13456	0.00556352841852135	0.0460476038461122	0.0352246493208166	18591/14686/22339/244585/12142/235542	6
GO:0045687	positive regulation of glial cell differentiation	6/679	33/13456	0.00556352841852135	0.0460476038461122	0.0352246493208166	15205/18128/19262/12156/16176/24088	6
GO:0097242	amyloid-beta clearance	6/679	33/13456	0.00556352841852135	0.0460476038461122	0.0352246493208166	13121/12759/83433/21926/14725/233489	6
GO:0002726	positive regulation of T cell cytokine production	4/679	15/13456	0.00561432779758178	0.0460476038461122	0.0352246493208166	58185/16193/16177/16176	4
GO:0030728	ovulation	4/679	15/13456	0.00561432779758178	0.0460476038461122	0.0352246493208166	18792/11504/19225/16323	4
GO:0045064	T-helper 2 cell differentiation	4/679	15/13456	0.00561432779758178	0.0460476038461122	0.0352246493208166	12053/16193/16190/12051	4
GO:0060841	venous blood vessel development	4/679	15/13456	0.00561432779758178	0.0460476038461122	0.0352246493208166	11622/22339/18128/12168	4
GO:0072677	eosinophil migration	4/679	15/13456	0.00561432779758178	0.0460476038461122	0.0352246493208166	20303/20293/20306/20296	4
GO:1900221	regulation of amyloid-beta clearance	4/679	15/13456	0.00561432779758178	0.0460476038461122	0.0352246493208166	13121/12759/83433/21926	4
GO:1902106	negative regulation of leukocyte differentiation	10/679	78/13456	0.00566835520068904	0.0464071094847779	0.0354996573341146	16950/14991/17869/12053/16190/72828/12571/16658/319817/67122	10
GO:0010469	regulation of signaling receptor activity	11/679	91/13456	0.00597300456155569	0.0484654487775428	0.0370742078799629	15216/26556/19739/15251/18792/21926/11839/20296/216856/19229/14727	11
GO:0035150	regulation of tube size	11/679	91/13456	0.00597300456155569	0.0484654487775428	0.0370742078799629	18591/11622/15251/21926/19735/19225/240672/68667/16598/19204/12168	11
GO:0035296	regulation of tube diameter	11/679	91/13456	0.00597300456155569	0.0484654487775428	0.0370742078799629	18591/11622/15251/21926/19735/19225/240672/68667/16598/19204/12168	11
GO:0036294	cellular response to decreased oxygen levels	11/679	91/13456	0.00597300456155569	0.0484654487775428	0.0370742078799629	19155/19015/15251/17869/22339/13819/18128/19883/13653/17684/723827	11
GO:0097746	blood vessel diameter maintenance	11/679	91/13456	0.00597300456155569	0.0484654487775428	0.0370742078799629	18591/11622/15251/21926/19735/19225/240672/68667/16598/19204/12168	11
GO:2000514	regulation of CD4-positive	alpha-beta T cell activation	8/679	55/13456	0.00600955221778746	0.0486752343333959	0.0372346857771885	16950/12522/12053/16193/16190/12772/245126/319817	8
GO:0050714	positive regulation of protein secretion	13/679	117/13456	0.00605371780719923	0.0488429618438194	0.0373629908841353	19015/15251/50873/83433/11307/24088/68667/384783/17386/216856/16534/18111/11727	13
GO:0043536	positive regulation of blood vessel endothelial cell migration	7/679	44/13456	0.0060624502288572	0.0488429618438194	0.0373629908841353	18591/15251/20620/22339/18186/19225/21825	7
GO:0072678	T cell migration	7/679	44/13456	0.0060624502288572	0.0488429618438194	0.0373629908841353	57781/15945/20296/12772/12766/321019/76088	7
GO:0034341	response to interferon-gamma	12/679	104/13456	0.00608451498420559	0.0488478169455095	0.0373667048505562	20302/20305/20303/14026/20912/24088/236573/76074/20293/20306/20296/74732	12
GO:0051147	regulation of muscle cell differentiation	12/679	104/13456	0.00608451498420559	0.0488478169455095	0.0373667048505562	18591/74116/17691/18569/19735/18128/12156/79362/12180/110196/211323/667118	12
GO:0036037	CD8-positive	alpha-beta T cell activation	5/679	24/13456	0.00615441060546677	0.048977057825323	0.0374655691624661	18106/15216/19260/15040/14728	5
GO:0042462	eye photoreceptor cell development	5/679	24/13456	0.00615441060546677	0.048977057825323	0.0374655691624661	18591/14686/22339/244585/12142	5
GO:0048710	regulation of astrocyte differentiation	5/679	24/13456	0.00615441060546677	0.048977057825323	0.0374655691624661	15205/18128/12156/16176/15364	5
GO:1900745	positive regulation of p38MAPK cascade	5/679	24/13456	0.00615441060546677	0.048977057825323	0.0374655691624661	17295/17873/22339/12156/16176	5
GO:1904994	regulation of leukocyte adhesion to vascular endothelial cell	5/679	24/13456	0.00615441060546677	0.048977057825323	0.0374655691624661	54446/21926/16193/12772/19204	5
GO:0043281	regulation of cysteine-type endopeptidase activity involved in apoptotic process	16/679	158/13456	0.00617492625436311	0.0490545624953942	0.0375248572599121	12122/83383/20963/17869/15370/22339/21926/16193/12125/19225/79201/107607/215114/21825/223701/15511	16
GO:1903707	negative regulation of hemopoiesis	10/679	79/13456	0.00620501826139335	0.0492077406373912	0.0376420326585168	16950/14991/17869/12053/16190/72828/12571/16658/319817/67122	10
GO:0051153	regulation of striated muscle cell differentiation	9/679	67/13456	0.00625355580258985	0.0495064104580678	0.0378705036063473	74116/17691/19735/18128/12156/79362/12180/110196/211323	9
GO:0071417	cellular response to organonitrogen compound	33/679	414/13456	0.00633137429926778	0.0500354441150467	0.0382751940460121	16956/11622/19216/71962/14245/19739/15370/50873/83433/64898/21926/19262/16176/19260/24088/29815/18578/20190/18576/12927/75747/235442/107607/68667/13653/384783/12702/257632/723827/68441/12096/387174/442846	33
GO:0032102	negative regulation of response to external stimulus	23/679	260/13456	0.00640273094219489	0.0504242755170781	0.0385726351425618	18591/19015/14991/109934/171285/18792/57781/21926/18186/18128/72828/19883/23959/20293/12142/21825/213208/13024/268857/12702/257632/15040/21824	23
GO:0052547	regulation of peptidase activity	23/679	260/13456	0.00640273094219489	0.0504242755170781	0.0385726351425618	14038/12122/83383/20963/17869/15370/22339/74116/21926/16193/209378/12125/20713/19225/79201/107607/233489/215114/21825/17196/223701/78709/15511	23
GO:0032814	regulation of natural killer cell activation	6/679	34/13456	0.00647363392144411	0.0507162147929712	0.0387959574819972	18106/171285/19260/16168/12142/15040	6
GO:0045601	regulation of endothelial cell differentiation	6/679	34/13456	0.00647363392144411	0.0507162147929712	0.0387959574819972	22339/21926/18128/16176/12226/15901	6
GO:0060688	regulation of morphogenesis of a branching structure	6/679	34/13456	0.00647363392144411	0.0507162147929712	0.0387959574819972	14025/17295/20583/22339/21926/16176	6
GO:0032874	positive regulation of stress-activated MAPK cascade	11/679	92/13456	0.00648436665411011	0.0507162147929712	0.0387959574819972	17295/17873/22339/21926/215653/12156/16176/107607/257632/19229/330177	11
GO:0001889	liver development	12/679	105/13456	0.00656425041471748	0.051252946634295	0.0392065367371769	17295/11622/18792/15205/16004/21926/16193/18128/244585/16468/17684/12443	12
GO:0042310	vasoconstriction	8/679	56/13456	0.00670939405434331	0.0521180234391992	0.0398682872853739	18591/11622/15251/19225/240672/68667/19204/12168	8
GO:0043299	leukocyte degranulation	8/679	56/13456	0.00670939405434331	0.0521180234391992	0.0398682872853739	109934/20963/16797/16190/74732/12772/68891/19204	8
GO:0045670	regulation of osteoclast differentiation	8/679	56/13456	0.00670939405434331	0.0521180234391992	0.0398682872853739	20302/14281/83433/21926/215653/72828/17342/16658	8
GO:0045860	positive regulation of protein kinase activity	27/679	322/13456	0.00675632687020987	0.0523931855420704	0.04007877573147	18591/12576/17295/17873/23834/17311/20963/12759/16012/22339/21926/215653/12156/16176/11839/15505/16797/13653/21825/257632/69068/19229/330177/211323/12443/232801/11727	27
GO:0002437	inflammatory response to antigenic stimulus	7/679	45/13456	0.00687436041162641	0.0530374382944465	0.040571604356218	21926/12511/18128/213208/257632/15040/14728	7
GO:0072080	nephron tubule development	7/679	45/13456	0.00687436041162641	0.0530374382944465	0.040571604356218	17869/15205/22339/18128/12156/22420/381157	7
GO:0072577	endothelial cell apoptotic process	7/679	45/13456	0.00687436041162641	0.0530374382944465	0.040571604356218	57875/14991/21926/18569/20293/21825/12168	7
GO:1901615	organic hydroxy compound metabolic process	28/679	338/13456	0.00690569387619387	0.0531890330362682	0.0406875685144703	13121/18106/11303/72472/56193/15251/77974/17069/20583/50873/11307/13819/21926/16889/14933/12156/26570/66234/69863/13849/16522/242864/19204/19229/110196/20148/53881/208715	28
GO:0018105	peptidyl-serine phosphorylation	23/679	262/13456	0.00700643942841088	0.0537829886646313	0.0411419217700953	18591/13549/16156/17295/74747/18755/20963/20620/20112/22339/21926/16193/12747/215653/29815/22241/17763/19225/12985/227120/18413/27387/140810	23
GO:0019216	regulation of lipid metabolic process	23/679	262/13456	0.00700643942841088	0.0537829886646313	0.0411419217700953	18591/19015/57875/14245/20583/11307/17691/21926/14933/12156/16176/70461/18576/19883/19225/271221/69863/13653/384783/11810/257632/19229/110196	23
GO:0003158	endothelium development	11/679	93/13456	0.00702941239739798	0.0538684936581744	0.0412073298078903	18591/17295/22339/21926/53945/18128/16176/15945/12226/15901/12168	11
GO:0000188	inactivation of MAPK activity	4/679	16/13456	0.00719109574463816	0.0546475255919748	0.0418032593326826	75590/319520/240672/235584	4
GO:0002052	positive regulation of neuroblast proliferation	4/679	16/13456	0.00719109574463816	0.0546475255919748	0.0418032593326826	15251/22339/18128/242620	4
GO:0035743	CD4-positive	alpha-beta T cell cytokine production	4/679	16/13456	0.00719109574463816	0.0546475255919748	0.0418032593326826	58185/16193/16177/16176	4
GO:0045623	negative regulation of T-helper cell differentiation	4/679	16/13456	0.00719109574463816	0.0546475255919748	0.0418032593326826	16950/12053/16190/319817	4
GO:0071498	cellular response to fluid shear stress	4/679	16/13456	0.00719109574463816	0.0546475255919748	0.0418032593326826	20750/19225/16598/19229	4
GO:1901214	regulation of neuron death	25/679	293/13456	0.00722947506534023	0.0548476174957146	0.04195632195815	20302/18008/17865/74747/12227/15251/14281/12759/57781/50873/22339/21926/16193/18186/209456/12125/16176/26570/15505/20293/12985/13653/233489/14362/19229	25
GO:0018209	peptidyl-serine modification	24/679	278/13456	0.00729240597663105	0.0552329983454652	0.0422511235146607	18591/13549/16156/17295/74747/18755/20963/20620/20112/22339/21926/16193/12747/66617/215653/29815/22241/17763/19225/12985/227120/18413/27387/140810	24
GO:0030900	forebrain development	22/679	248/13456	0.0073229985066634	0.0553725734258003	0.0423578930932725	12032/16560/12227/15251/15205/18186/18187/18128/14725/12156/14013/26570/15572/244585/231380/16323/211612/223701/242620/15364/211323/140810	22
GO:0009595	detection of biotic stimulus	5/679	25/13456	0.00737962990398247	0.0553747290307046	0.0423595420482774	83433/24088/107607/13134/257632	5
GO:0032660	regulation of interleukin-17 production	5/679	25/13456	0.00737962990398247	0.0553747290307046	0.0423595420482774	16193/24088/16168/257632/18413	5
GO:0072539	T-helper 17 cell differentiation	5/679	25/13456	0.00737962990398247	0.0553747290307046	0.0423595420482774	16950/16364/16193/19883/319817	5
GO:0002688	regulation of leukocyte chemotaxis	10/679	81/13456	0.00739627312185158	0.0553747290307046	0.0423595420482774	20303/22339/16176/15945/20293/20296/21825/12772/257632/19229	10
GO:0009636	response to toxic substance	10/679	81/13456	0.00739627312185158	0.0553747290307046	0.0423595420482774	11864/20303/11622/15251/77974/20273/50873/26570/13849/17196	10
GO:0071456	cellular response to hypoxia	10/679	81/13456	0.00739627312185158	0.0553747290307046	0.0423595420482774	19155/19015/15251/17869/22339/13819/18128/19883/13653/17684	10
GO:0043407	negative regulation of MAP kinase activity	8/679	57/13456	0.00746916264602939	0.0555979060293342	0.0425302638851719	15170/19735/16176/19260/75590/319520/240672/235584	8
GO:0002067	glandular epithelial cell differentiation	6/679	35/13456	0.00748715210808037	0.0555979060293342	0.0425302638851719	15205/18128/12156/12571/19726/667118	6
GO:0021536	diencephalon development	6/679	35/13456	0.00748715210808037	0.0555979060293342	0.0425302638851719	15205/18186/18187/12156/211612/15364	6
GO:0032835	glomerulus development	6/679	35/13456	0.00748715210808037	0.0555979060293342	0.0425302638851719	18591/11622/15205/18128/19277/13653	6
GO:0046636	negative regulation of alpha-beta T cell activation	6/679	35/13456	0.00748715210808037	0.0555979060293342	0.0425302638851719	16950/15216/12053/16190/245126/319817	6
GO:0051480	regulation of cytosolic calcium ion concentration	20/679	219/13456	0.00754825002297117	0.055960316131213	0.0428074937013349	20302/15170/14686/19216/16176/20190/72828/67168/15945/21817/68667/18821/19222/54199/233979/12772/12766/20310/19229/252837	20
GO:0002260	lymphocyte homeostasis	9/679	69/13456	0.00758365577840512	0.0561313839078051	0.0429383539836785	11622/15251/53945/12125/16797/79201/53374/18733/319817	9
GO:0070304	positive regulation of stress-activated protein kinase signaling cascade	11/679	94/13456	0.00760959746254971	0.0561661019218676	0.0429649119317219	17295/17873/22339/21926/215653/12156/16176/107607/257632/19229/330177	11
GO:0061008	hepaticobiliary system development	12/679	107/13456	0.00761302392042889	0.0561661019218676	0.0429649119317219	17295/11622/18792/15205/16004/21926/16193/18128/244585/16468/17684/12443	12
GO:0032720	negative regulation of tumor necrosis factor production	7/679	46/13456	0.00776423759209514	0.0571890121670179	0.043747399002982	15170/171285/83433/19260/268857/12051/257632	7
GO:1990138	neuron projection extension	15/679	148/13456	0.00780873417270308	0.0573527974491168	0.0438726884565901	14025/29869/12032/76901/50873/22339/11302/18186/18187/22241/171207/233489/17755/211323/12168	15
GO:0010810	regulation of cell-substrate adhesion	16/679	162/13456	0.00781167276328041	0.0573527974491168	0.0438726884565901	18591/68732/18792/12053/22339/18186/18128/19262/20750/11856/12927/13612/20130/21825/12571/19229	16
GO:0072331	signal transduction by p53 class mediator	13/679	121/13456	0.00799387023919814	0.0585959699337036	0.0448236676858504	29813/83383/74747/20583/50873/68428/209456/28019/17920/110109/67239/12051/59014	13
GO:0098739	import across plasma membrane	12/679	108/13456	0.00818447653520159	0.0598966835823756	0.0458186636968131	15216/21926/227059/19735/14725/26570/68667/384783/21825/279561/16518/16522	12
GO:0030500	regulation of bone mineralization	8/679	58/13456	0.00829192415687929	0.060585615990553	0.0463456705431388	15251/80752/12156/68667/19229/12168/110789/12096	8
GO:0006721	terpenoid metabolic process	6/679	36/13456	0.00861029629632608	0.0624961683447976	0.0478071697540909	19015/77974/19682/110196/20148/208715	6
GO:0048662	negative regulation of smooth muscle cell proliferation	6/679	36/13456	0.00861029629632608	0.0624961683447976	0.0478071697540909	19015/12576/18569/16168/19222/11727	6
GO:0060675	ureteric bud morphogenesis	6/679	36/13456	0.00861029629632608	0.0624961683447976	0.0478071697540909	17869/15205/22339/12156/22420/381157	6
GO:0072171	mesonephric tubule morphogenesis	6/679	36/13456	0.00861029629632608	0.0624961683447976	0.0478071697540909	17869/15205/22339/12156/22420/381157	6
GO:0010632	regulation of epithelial cell migration	17/679	178/13456	0.00862205485951953	0.0624961683447976	0.0478071697540909	18591/17295/15251/14026/20620/20583/22339/212307/21926/18186/18128/12927/19225/20130/21825/19229/12168	17
GO:0008543	fibroblast growth factor receptor signaling pathway	7/679	47/13456	0.00873631394209755	0.0626747789421822	0.0479438000047958	18591/80752/83379/14733/12393/21825/213452	7
GO:0042509	regulation of tyrosine phosphorylation of STAT protein	7/679	47/13456	0.00873631394209755	0.0626747789421822	0.0479438000047958	15468/15205/21926/16193/16168/12702/18413	7
GO:0046579	positive regulation of Ras protein signal transduction	7/679	47/13456	0.00873631394209755	0.0626747789421822	0.0479438000047958	17311/212307/18128/17207/67168/244418/211323	7
GO:1903556	negative regulation of tumor necrosis factor superfamily cytokine production	7/679	47/13456	0.00873631394209755	0.0626747789421822	0.0479438000047958	15170/171285/83433/19260/268857/12051/257632	7
GO:2001238	positive regulation of extrinsic apoptotic signaling pathway	7/679	47/13456	0.00873631394209755	0.0626747789421822	0.0479438000047958	12122/21926/11910/20612/83925/21825/16323	7
GO:1901888	regulation of cell junction assembly	14/679	136/13456	0.00874126347328834	0.0626747789421822	0.0479438000047958	18755/20583/22339/21926/18186/19262/16176/24088/11856/58235/21983/217692/14362/216856	14
GO:0010614	negative regulation of cardiac muscle hypertrophy	5/679	26/13456	0.00876502851905249	0.0626747789421822	0.0479438000047958	67731/74116/19735/18128/16468	5
GO:0014741	negative regulation of muscle hypertrophy	5/679	26/13456	0.00876502851905249	0.0626747789421822	0.0479438000047958	67731/74116/19735/18128/16468	5
GO:0043271	negative regulation of ion transport	21/679	237/13456	0.00877061383703209	0.0626747789421822	0.0479438000047958	13121/11622/58185/17869/15205/50873/21926/54393/19735/16176/20912/18576/75767/19225/100503659/18821/384783/21825/279561/12495/19229	21
GO:0051961	negative regulation of nervous system development	12/679	109/13456	0.0087889392954875	0.0627072910236036	0.0479686704990475	14025/29869/15205/11302/18186/18128/16176/24088/22241/171207/15901/15364	12
GO:0007259	receptor signaling pathway via JAK-STAT	11/679	96/13456	0.0088812899955282	0.0632670298272995	0.0483968491972775	15468/15205/21926/16193/18128/16168/12702/12051/15364/18413/19229	11
GO:0002693	positive regulation of cellular extravasation	4/679	17/13456	0.00903426816626588	0.063267674912065	0.0483973426623604	16177/20296/12772/19204	4
GO:0021602	cranial nerve morphogenesis	4/679	17/13456	0.00903426816626588	0.063267674912065	0.0483973426623604	18186/18187/17684/16658	4
GO:0030325	adrenal gland development	4/679	17/13456	0.00903426816626588	0.063267674912065	0.0483973426623604	71371/17069/17684/15364	4
GO:0048569	post-embryonic animal organ development	4/679	17/13456	0.00903426816626588	0.063267674912065	0.0483973426623604	11622/22339/12125/17921	4
GO:0070168	negative regulation of biomineral tissue development	4/679	17/13456	0.00903426816626588	0.063267674912065	0.0483973426623604	15251/18128/68667/19229	4
GO:0090036	regulation of protein kinase C signaling	4/679	17/13456	0.00903426816626588	0.063267674912065	0.0483973426623604	110197/22339/110789/227333	4
GO:0090050	positive regulation of cell migration involved in sprouting angiogenesis	4/679	17/13456	0.00903426816626588	0.063267674912065	0.0483973426623604	20620/22339/18186/19225	4
GO:0110150	negative regulation of biomineralization	4/679	17/13456	0.00903426816626588	0.063267674912065	0.0483973426623604	15251/18128/68667/19229	4
GO:2000269	regulation of fibroblast apoptotic process	4/679	17/13456	0.00903426816626588	0.063267674912065	0.0483973426623604	12122/98267/12125/12226	4
GO:2000773	negative regulation of cellular senescence	4/679	17/13456	0.00903426816626588	0.063267674912065	0.0483973426623604	20620/12053/12571/15364	4
GO:2001185	regulation of CD8-positive	alpha-beta T cell activation	4/679	17/13456	0.00903426816626588	0.063267674912065	0.0483973426623604	18106/15216/19260/15040	4
GO:0007189	adenylate cyclase-activating G protein-coupled receptor signaling pathway	9/679	71/13456	0.00911936370235387	0.0635702045530089	0.0486287662245291	11303/19216/18578/15945/17201/18821/19222/12766/105171	9
GO:0009308	amine metabolic process	9/679	71/13456	0.00911936370235387	0.0635702045530089	0.0486287662245291	20810/18263/17069/50873/13819/266645/26570/242864/330817	9
GO:0044106	cellular amine metabolic process	9/679	71/13456	0.00911936370235387	0.0635702045530089	0.0486287662245291	20810/18263/17069/50873/13819/266645/26570/242864/330817	9
GO:0050778	positive regulation of immune response	30/679	377/13456	0.00918029479279271	0.063802725203674	0.0488066355965576	15170/14991/171285/58185/18755/20963/21926/71398/54123/16193/227059/16177/16176/19260/24088/18578/21682/16190/16168/12927/12509/257630/12772/68891/16534/257632/19204/17060/15040/319817	30
GO:0050848	regulation of calcium-mediated signaling	8/679	59/13456	0.00918075241836697	0.063802725203674	0.0488066355965576	54446/20303/20963/83433/21926/19229/211323/100504518	8
GO:0030282	bone mineralization	10/679	84/13456	0.00950524941879316	0.0658567661405578	0.0503778980651571	15251/80752/12156/19225/68667/17386/19229/12168/110789/12096	10
GO:0051897	positive regulation of protein kinase B signaling	10/679	84/13456	0.00950524941879316	0.0658567661405578	0.0503778980651571	17295/22339/21926/16193/14725/21983/12985/21825/18413/211323	10
GO:0006875	cellular metal ion homeostasis	31/679	394/13456	0.00954497529037923	0.0660315007930186	0.0505115633667805	20302/15170/15216/14686/19216/15251/76137/17869/227059/53945/68428/14725/16176/20750/20190/72828/67168/15945/20296/21817/224079/68667/18821/19222/54199/233979/12772/12766/20310/19229/252837	31
GO:0045807	positive regulation of endocytosis	11/679	97/13456	0.00957578403385698	0.0661441106557162	0.0505977055890087	15216/20963/12759/22339/83433/14725/73094/233489/215114/12475/227333	11
GO:0060541	respiratory system development	16/679	166/13456	0.00977890138818185	0.0671159934166305	0.0513411585936116	16950/319939/15205/22339/13819/21926/16889/18128/26570/244585/15901/16598/15364/12168/320277/319817	16
GO:0014032	neural crest cell development	7/679	48/13456	0.00979479998639813	0.0671159934166305	0.0513411585936116	17311/15251/15205/20583/18186/18187/17684	7
GO:0051384	response to glucocorticoid	7/679	48/13456	0.00979479998639813	0.0671159934166305	0.0513411585936116	83383/74747/67731/21926/16193/11839/77128	7
GO:0060760	positive regulation of response to cytokine stimulus	7/679	48/13456	0.00979479998639813	0.0671159934166305	0.0513411585936116	15251/50873/83433/54123/16177/24088/77128	7
GO:0060993	kidney morphogenesis	7/679	48/13456	0.00979479998639813	0.0671159934166305	0.0513411585936116	11622/17869/15205/22339/12156/22420/381157	7
GO:0045124	regulation of bone resorption	6/679	37/13456	0.00984918356816986	0.0671159934166305	0.0513411585936116	20963/22339/16193/20750/72828/353047	6
GO:0046460	neutral lipid biosynthetic process	6/679	37/13456	0.00984918356816986	0.0671159934166305	0.0513411585936116	16956/14245/17691/64898/231510/11727	6
GO:0046463	acylglycerol biosynthetic process	6/679	37/13456	0.00984918356816986	0.0671159934166305	0.0513411585936116	16956/14245/17691/64898/231510/11727	6
GO:1905330	regulation of morphogenesis of an epithelium	6/679	37/13456	0.00984918356816986	0.0671159934166305	0.0513411585936116	21385/17295/20583/22339/21926/15945	6
GO:0045137	development of primary sexual characteristics	15/679	152/13456	0.00988665549092617	0.0671702325293969	0.0513826494328103	12124/11622/71371/17311/380684/11504/22339/14725/12125/99929/17684/16323/13134/15364/12443	15
GO:0048762	mesenchymal cell differentiation	15/679	152/13456	0.00988665549092617	0.0671702325293969	0.0513826494328103	16950/17311/15251/15205/20583/22339/18569/16193/18186/18187/18128/12156/16176/17684/629378	15
GO:0022604	regulation of cell morphogenesis	23/679	270/13456	0.00990665786420201	0.0672058220534241	0.0514098740525222	14025/20302/15162/17295/67220/69288/68732/50873/22339/106952/16193/18186/140571/12927/67938/20293/20296/260409/677884/233489/244418/19229/16988	23
GO:0098655	cation transmembrane transport	36/679	476/13456	0.0100077278266019	0.0677904420635295	0.0518570859185449	15170/15216/26556/68279/11622/19739/76137/20273/83433/227059/53945/19735/68428/227731/19260/18578/20190/72828/208638/15945/20296/100503659/57780/68667/18821/279561/16518/16522/12856/16491/233979/12766/216856/16534/19229/214922	36
GO:0010631	epithelial cell migration	20/679	225/13456	0.0100377546299242	0.0678928069471247	0.0519353911250321	18591/19015/17295/15251/14026/20620/20583/15370/22339/212307/21926/18186/18128/12927/19225/13655/20130/21825/19229/12168	20
GO:1901699	cellular response to nitrogen compound	35/679	460/13456	0.0100856375872401	0.0681154633488378	0.0521057147252696	16956/11622/19216/71962/14245/19739/17069/15370/50873/83433/64898/21926/19262/16176/19260/24088/29815/18578/20190/18576/12927/75747/235442/107607/68667/13653/384783/21825/12702/257632/723827/68441/12096/387174/442846	35
GO:0002761	regulation of myeloid leukocyte differentiation	11/679	98/13456	0.0103113860280542	0.0691860326658689	0.0529246591570378	20302/17311/14281/17869/83433/21926/215653/72828/17342/12571/16658	11
GO:0002446	neutrophil mediated immunity	5/679	27/13456	0.0103201485457217	0.0691860326658689	0.0529246591570378	109934/20963/74732/68891/19204	5
GO:0035162	embryonic hemopoiesis	5/679	27/13456	0.0103201485457217	0.0691860326658689	0.0529246591570378	11622/17311/15251/22339/16909	5
GO:0035886	vascular associated smooth muscle cell differentiation	5/679	27/13456	0.0103201485457217	0.0691860326658689	0.0529246591570378	18591/15205/22339/18569/18128	5
GO:2000515	negative regulation of CD4-positive	alpha-beta T cell activation	5/679	27/13456	0.0103201485457217	0.0691860326658689	0.0529246591570378	16950/12053/16190/245126/319817	5
GO:0007219	Notch signaling pathway	13/679	125/13456	0.0103937943667653	0.0695656384423137	0.0532150430041563	21385/12576/12053/15205/20583/18128/12156/18821/12571/244418/257632/69068/67122	13
GO:0090087	regulation of peptide transport	35/679	461/13456	0.0104073373855922	0.0695656384423137	0.0532150430041563	13121/19015/15216/58185/15251/50873/83433/11307/21926/54393/16193/14725/16176/26570/19260/24088/18576/75767/19225/20296/235442/68667/384783/233489/19726/225608/77128/17386/216856/16534/15364/18111/11727/667118/99889	35
GO:0090132	epithelium migration	20/679	226/13456	0.0105104012072187	0.070151534157272	0.0536632307354213	18591/19015/17295/15251/14026/20620/20583/15370/22339/212307/21926/18186/18128/12927/19225/13655/20130/21825/19229/12168	20
GO:0055065	metal ion homeostasis	34/679	446/13456	0.0108157904582405	0.0720841554405723	0.0551416118299447	20302/15170/15216/14686/19216/15251/76137/17869/13819/227059/53945/68428/14725/16176/20750/20190/72828/67168/15945/20296/21817/224079/68667/18821/233489/19222/54199/233979/12772/12766/20310/19229/94219/252837	34
GO:0120162	positive regulation of cold-induced thermogenesis	9/679	73/13456	0.0108794148564241	0.0723650715400222	0.0553565018625459	53422/14245/16364/20963/22339/13819/16190/12772/104263	9
GO:0015844	monoamine transport	7/679	49/13456	0.0109438690505144	0.0723650715400222	0.0553565018625459	20963/17069/50873/54393/12495/269642/27062	7
GO:0046530	photoreceptor cell differentiation	7/679	49/13456	0.0109438690505144	0.0723650715400222	0.0553565018625459	18591/14686/22339/18128/244585/12142/235542	7
GO:0051145	smooth muscle cell differentiation	7/679	49/13456	0.0109438690505144	0.0723650715400222	0.0553565018625459	21385/18591/15205/22339/18569/18128/223701	7
GO:0061326	renal tubule development	7/679	49/13456	0.0109438690505144	0.0723650715400222	0.0553565018625459	17869/15205/22339/18128/12156/22420/381157	7
GO:0090130	tissue migration	20/679	227/13456	0.0110007268351234	0.0723650715400222	0.0553565018625459	18591/19015/17295/15251/14026/20620/20583/15370/22339/212307/21926/18186/18128/12927/19225/13655/20130/21825/19229/12168	20
GO:0050796	regulation of insulin secretion	13/679	126/13456	0.0110734642583186	0.0723650715400222	0.0553565018625459	19015/15251/50873/21926/16193/16176/18576/68667/384783/19726/216856/18111/667118	13
GO:0050954	sensory perception of mechanical stimulus	14/679	140/13456	0.0111471203146985	0.0723650715400222	0.0553565018625459	12576/17869/20583/20273/21926/14725/17921/240411/17920/17196/78286/723827/387217/110789	14
GO:0050764	regulation of phagocytosis	10/679	86/13456	0.0111475080931927	0.0723650715400222	0.0553565018625459	15162/109934/20963/83433/21926/16176/24088/16168/20296/257632	10
GO:0090277	positive regulation of peptide hormone secretion	10/679	86/13456	0.0111475080931927	0.0723650715400222	0.0553565018625459	19015/15216/15251/50873/54393/235442/68667/384783/216856/18111	10
GO:0002313	mature B cell differentiation involved in immune response	4/679	18/13456	0.0111599912612249	0.0723650715400222	0.0553565018625459	16193/321019/12051/19229	4
GO:0014823	response to activity	4/679	18/13456	0.0111599912612249	0.0723650715400222	0.0553565018625459	15251/16193/227731/442846	4
GO:0031954	positive regulation of protein autophosphorylation	4/679	18/13456	0.0111599912612249	0.0723650715400222	0.0553565018625459	18591/20963/22339/215653	4
GO:0032495	response to muramyl dipeptide	4/679	18/13456	0.0111599912612249	0.0723650715400222	0.0553565018625459	18128/19260/107607/257632	4
GO:0035883	enteroendocrine cell differentiation	4/679	18/13456	0.0111599912612249	0.0723650715400222	0.0553565018625459	15205/12571/19726/667118	4
GO:0050995	negative regulation of lipid catabolic process	4/679	18/13456	0.0111599912612249	0.0723650715400222	0.0553565018625459	21926/16176/70461/18576	4
GO:0060317	cardiac epithelial to mesenchymal transition	4/679	18/13456	0.0111599912612249	0.0723650715400222	0.0553565018625459	20583/18569/18128/12156	4
GO:0071875	adrenergic receptor signaling pathway	4/679	18/13456	0.0111599912612249	0.0723650715400222	0.0553565018625459	19735/18578/18821/105171	4
GO:2000353	positive regulation of endothelial cell apoptotic process	4/679	18/13456	0.0111599912612249	0.0723650715400222	0.0553565018625459	14991/18569/20293/21825	4
GO:0051937	catecholamine transport	6/679	38/13456	0.0112098049706031	0.0724815798667407	0.0554456262601004	17069/50873/54393/12495/269642/27062	6
GO:0072078	nephron tubule morphogenesis	6/679	38/13456	0.0112098049706031	0.0724815798667407	0.0554456262601004	17869/15205/22339/12156/22420/381157	6
GO:0001771	immunological synapse formation	3/679	10/13456	0.0117586789050098	0.0749372734383317	0.0573241375760802	171285/12511/76088	3
GO:0031280	negative regulation of cyclase activity	3/679	10/13456	0.0117586789050098	0.0749372734383317	0.0573241375760802	54393/74191/110789	3
GO:0032490	detection of molecule of bacterial origin	3/679	10/13456	0.0117586789050098	0.0749372734383317	0.0573241375760802	83433/24088/257632	3
GO:0033212	iron import into cell	3/679	10/13456	0.0117586789050098	0.0749372734383317	0.0573241375760802	15216/68428/14725	3
GO:0042640	anagen	3/679	10/13456	0.0117586789050098	0.0749372734383317	0.0573241375760802	19015/18128/19225	3
GO:0048012	hepatocyte growth factor receptor signaling pathway	3/679	10/13456	0.0117586789050098	0.0749372734383317	0.0573241375760802	17295/18186/12927	3
GO:0060947	cardiac vascular smooth muscle cell differentiation	3/679	10/13456	0.0117586789050098	0.0749372734383317	0.0573241375760802	18591/22339/18128	3
GO:0072540	T-helper 17 cell lineage commitment	3/679	10/13456	0.0117586789050098	0.0749372734383317	0.0573241375760802	16950/16364/16193	3
GO:1902043	positive regulation of extrinsic apoptotic signaling pathway via death domain receptors	3/679	10/13456	0.0117586789050098	0.0749372734383317	0.0573241375760802	11910/83925/21825	3
GO:0051403	stress-activated MAPK cascade	17/679	184/13456	0.0117838398291438	0.0749372734383317	0.0573241375760802	17295/17873/20963/22339/21926/215653/12156/16176/14013/19260/15505/79201/107607/59036/257632/19229/330177	17
GO:0007605	sensory perception of sound	13/679	127/13456	0.0117871458220223	0.0749372734383317	0.0573241375760802	12576/17869/20583/20273/14725/17921/240411/17920/17196/78286/723827/387217/110789	13
GO:0071356	cellular response to tumor necrosis factor	13/679	127/13456	0.0117871458220223	0.0749372734383317	0.0573241375760802	20302/20305/20303/20963/50873/21926/16193/19883/20293/20306/20296/19229/723827	13
GO:0072073	kidney epithelium development	9/679	74/13456	0.0118494428559586	0.0752282620367135	0.0575467326837129	18591/17869/15205/22339/18128/12156/19277/22420/381157	9
GO:0019724	B cell mediated immunity	11/679	100/13456	0.0119119888316393	0.0752678432047729	0.0575770107578829	15170/14991/12053/21926/54123/22256/16190/12051/257632/18733/15040	11
GO:0007265	Ras protein signal transduction	24/679	290/13456	0.0119454106326803	0.0752678432047729	0.0575770107578829	17295/11303/19157/109934/17311/13998/20620/12053/212307/106952/11302/18186/18128/22241/16797/17207/67168/260409/101497/20130/72754/244418/263406/211323	24
GO:0046578	regulation of Ras protein signal transduction	18/679	199/13456	0.0119575996248507	0.0752678432047729	0.0575770107578829	17295/11303/19157/109934/17311/13998/12053/212307/106952/18186/18128/17207/67168/101497/72754/244418/263406/211323	18
GO:0071902	positive regulation of protein serine/threonine kinase activity	18/679	199/13456	0.0119575996248507	0.0752678432047729	0.0575770107578829	18591/12576/17295/17873/23834/17311/20963/16012/22339/21926/12156/16176/21825/257632/69068/19229/330177/12443	18
GO:0019882	antigen processing and presentation	10/679	87/13456	0.0120451090792887	0.0752678432047729	0.0575770107578829	13034/15216/14991/83433/15001/235442/107607/21825/257632/15040	10
GO:0001773	myeloid dendritic cell activation	5/679	28/13456	0.0120540987909225	0.0752678432047729	0.0575770107578829	18106/171285/16364/381319/18733	5
GO:0002691	regulation of cellular extravasation	5/679	28/13456	0.0120540987909225	0.0752678432047729	0.0575770107578829	109934/16177/20296/12772/19204	5
GO:0030195	negative regulation of blood coagulation	5/679	28/13456	0.0120540987909225	0.0752678432047729	0.0575770107578829	18591/18792/72828/21825/21824	5
GO:0032743	positive regulation of interleukin-2 production	5/679	28/13456	0.0120540987909225	0.0752678432047729	0.0575770107578829	12522/16364/16176/18578/12772	5
GO:0051154	negative regulation of striated muscle cell differentiation	5/679	28/13456	0.0120540987909225	0.0752678432047729	0.0575770107578829	74116/19735/18128/12156/79362	5
GO:0060412	ventricular septum morphogenesis	5/679	28/13456	0.0120540987909225	0.0752678432047729	0.0575770107578829	15205/18128/17684/14362/12168	5
GO:2000403	positive regulation of lymphocyte migration	5/679	28/13456	0.0120540987909225	0.0752678432047729	0.0575770107578829	20303/15945/12772/76088/19229	5
GO:0007260	tyrosine phosphorylation of STAT protein	7/679	50/13456	0.0121876419703264	0.0756864205305944	0.0578972063442804	15468/15205/21926/16193/16168/12702/18413	7
GO:0046888	negative regulation of hormone secretion	7/679	50/13456	0.0121876419703264	0.0756864205305944	0.0578972063442804	16156/50873/16193/16176/18576/75767/18413	7
GO:0048260	positive regulation of receptor-mediated endocytosis	7/679	50/13456	0.0121876419703264	0.0756864205305944	0.0578972063442804	15216/20963/12759/22339/73094/215114/227333	7
GO:0060976	coronary vasculature development	7/679	50/13456	0.0121876419703264	0.0756864205305944	0.0578972063442804	18591/22339/18186/18128/14725/12142/73692	7
GO:0043086	negative regulation of catalytic activity	37/679	499/13456	0.0122256818986401	0.075819215262411	0.0579987892165516	14038/57875/12576/15170/83383/17873/11622/15370/50873/22339/74116/21926/54393/16193/209378/19735/18128/16176/20713/19260/19277/75590/140571/319520/72828/19225/240672/107895/74191/384783/233489/21825/223701/78709/235584/110789/15511	37
GO:0060627	regulation of vesicle-mediated transport	34/679	450/13456	0.0122598581647182	0.0759139185221352	0.0580712335748828	15162/15216/19157/109934/20963/12759/50873/22339/83433/21926/18128/14725/98878/16176/20912/24088/73094/16190/16168/12217/17920/20296/100503659/235442/233489/215114/12772/12475/68891/27062/257632/19204/227333/99889	34
GO:0006576	cellular biogenic amine metabolic process	8/679	62/13456	0.012274306685477	0.0759139185221352	0.0580712335748828	20810/18263/17069/50873/13819/266645/242864/330817	8
GO:1901617	organic hydroxy compound biosynthetic process	15/679	156/13456	0.012378381473719	0.0764537211239742	0.0584841618439799	13121/18106/56193/20583/11307/13819/21926/12156/26570/66234/13849/19204/19229/110196/208715	15
GO:0007266	Rho protein signal transduction	14/679	142/13456	0.0125294522023844	0.0769049816296209	0.0588293588083401	17295/11303/109934/13998/12053/106952/18186/17207/67168/260409/101497/72754/244418/263406	14
GO:0030324	lung development	14/679	142/13456	0.0125294522023844	0.0769049816296209	0.0588293588083401	16950/319939/15205/22339/13819/21926/16889/18128/26570/15901/16598/15364/12168/319817	14
GO:0034612	response to tumor necrosis factor	14/679	142/13456	0.0125294522023844	0.0769049816296209	0.0588293588083401	20302/20305/20303/20963/50873/21926/16193/19883/20293/20306/20296/12475/19229/723827	14
GO:0035265	organ growth	14/679	142/13456	0.0125294522023844	0.0769049816296209	0.0588293588083401	21385/11622/17069/74116/19735/18128/12125/75590/19374/16468/17684/21825/17386/110196	14
GO:2001236	regulation of extrinsic apoptotic signaling pathway	13/679	128/13456	0.0125359174800481	0.0769049816296209	0.0588293588083401	12122/20583/22339/21926/18186/11910/20612/16176/79201/83925/21825/16323/414801	13
GO:0043277	apoptotic cell clearance	6/679	39/13456	0.0126979971128012	0.0775856145737868	0.0593500168832871	69288/83433/20296/21817/21825/12772	6
GO:0072028	nephron morphogenesis	6/679	39/13456	0.0126979971128012	0.0775856145737868	0.0593500168832871	17869/15205/22339/12156/22420/381157	6
GO:0072088	nephron epithelium morphogenesis	6/679	39/13456	0.0126979971128012	0.0775856145737868	0.0593500168832871	17869/15205/22339/12156/22420/381157	6
GO:0043535	regulation of blood vessel endothelial cell migration	9/679	75/13456	0.0128825965029042	0.078397833263663	0.0599713330025431	18591/15251/20620/22339/21926/18186/18128/19225/21825	9
GO:0045833	negative regulation of lipid metabolic process	9/679	75/13456	0.0128825965029042	0.078397833263663	0.0599713330025431	18591/20583/17691/21926/12156/16176/70461/18576/11810	9
GO:2000106	regulation of leukocyte apoptotic process	9/679	75/13456	0.0128825965029042	0.078397833263663	0.0599713330025431	17311/15251/17869/227059/20612/26570/384783/76088/257632	9
GO:0030316	osteoclast differentiation	10/679	88/13456	0.012996179705304	0.0787731158702317	0.0602584097906592	20302/14281/83433/21926/80752/215653/72828/17342/321019/16658	10
GO:0034766	negative regulation of ion transmembrane transport	10/679	88/13456	0.012996179705304	0.0787731158702317	0.0602584097906592	11622/17869/21926/19735/16176/20912/100503659/18821/384783/21825	10
GO:0046660	female sex differentiation	10/679	88/13456	0.012996179705304	0.0787731158702317	0.0602584097906592	11622/71371/17311/380684/11504/22339/14725/99929/16323/13134	10
GO:0043583	ear development	13/679	129/13456	0.0133208615322004	0.0804012664569992	0.0615038824899994	12576/109934/17869/15205/18128/12156/12125/17921/244585/17920/15040/110789/16658	13
GO:0016049	cell growth	30/679	388/13456	0.0133778931440739	0.0804012664569992	0.0615038824899994	14025/19015/12576/235036/29869/12032/55942/15468/76901/12053/50873/22339/74116/11302/18186/18187/19735/11787/22241/171207/233489/16323/17755/170742/19229/110196/211323/12168/12983/629378	30
GO:0006869	lipid transport	24/679	293/13456	0.0134206836135058	0.0804012664569992	0.0615038824899994	19015/11303/74309/20493/20963/11307/21926/54393/16176/11981/26570/74152/26970/20750/71720/235527/17920/69863/384783/235283/21825/71795/16323/16534	24
GO:0002690	positive regulation of leukocyte chemotaxis	8/679	63/13456	0.0134579862990394	0.0804012664569992	0.0615038824899994	20303/22339/16176/15945/20296/21825/12772/19229	8
GO:0043154	negative regulation of cysteine-type endopeptidase activity involved in apoptotic process	8/679	63/13456	0.0134579862990394	0.0804012664569992	0.0615038824899994	15370/22339/21926/16193/19225/21825/223701/15511	8
GO:0002504	antigen processing and presentation of peptide or polysaccharide antigen via MHC class II	4/679	19/13456	0.0135827271321249	0.0804012664569992	0.0615038824899994	13034/83433/15001/21825	4
GO:0010829	negative regulation of glucose transmembrane transport	4/679	19/13456	0.0135827271321249	0.0804012664569992	0.0615038824899994	17869/21926/16176/20912	4
GO:0031065	positive regulation of histone deacetylation	4/679	19/13456	0.0135827271321249	0.0804012664569992	0.0615038824899994	14245/12053/22339/81703	4
GO:0043371	negative regulation of CD4-positive	alpha-beta T cell differentiation	4/679	19/13456	0.0135827271321249	0.0804012664569992	0.0615038824899994	16950/12053/16190/319817	4
GO:0044346	fibroblast apoptotic process	4/679	19/13456	0.0135827271321249	0.0804012664569992	0.0615038824899994	12122/98267/12125/12226	4
GO:0048846	axon extension involved in axon guidance	4/679	19/13456	0.0135827271321249	0.0804012664569992	0.0615038824899994	22339/18186/18187/12168	4
GO:0060039	pericardium development	4/679	19/13456	0.0135827271321249	0.0804012664569992	0.0615038824899994	18128/12156/14013/244585	4
GO:0060914	heart formation	4/679	19/13456	0.0135827271321249	0.0804012664569992	0.0615038824899994	15205/18128/14725/12156	4
GO:0060977	coronary vasculature morphogenesis	4/679	19/13456	0.0135827271321249	0.0804012664569992	0.0615038824899994	22339/18186/18128/14725	4
GO:0086004	regulation of cardiac muscle cell contraction	4/679	19/13456	0.0135827271321249	0.0804012664569992	0.0615038824899994	18578/68667/18821/16518	4
GO:0090335	regulation of brown fat cell differentiation	4/679	19/13456	0.0135827271321249	0.0804012664569992	0.0615038824899994	14013/19225/242864/20668	4
GO:0098581	detection of external biotic stimulus	4/679	19/13456	0.0135827271321249	0.0804012664569992	0.0615038824899994	83433/24088/107607/257632	4
GO:1902284	neuron projection extension involved in neuron projection guidance	4/679	19/13456	0.0135827271321249	0.0804012664569992	0.0615038824899994	22339/18186/18187/12168	4
GO:0070588	calcium ion transmembrane transport	17/679	187/13456	0.0136756415257157	0.0807412713684277	0.0617639731955321	15170/68279/11622/19739/76137/227731/19260/18578/20190/72828/15945/100503659/68667/18821/233979/12766/19229	17
GO:0090287	regulation of cellular response to growth factor stimulus	17/679	187/13456	0.0136756415257157	0.0807412713684277	0.0617639731955321	18591/15251/15205/80752/18128/14725/22241/12509/14733/22057/12393/17684/21825/257630/213452/14362/12168	17
GO:0042113	B cell activation	19/679	217/13456	0.0138011102544828	0.0813764946611476	0.0622498946302553	14025/15170/11622/20963/17079/12053/16193/227059/22256/19374/242248/12142/384783/321019/12051/257632/19229/229499/17060	19
GO:0006873	cellular ion homeostasis	34/679	454/13456	0.0138576665732141	0.0815086334250534	0.0623509757122553	20302/12709/15170/15216/14686/19216/15251/76137/17869/71398/227059/53945/68428/14725/16176/20750/20190/72828/67168/15945/20296/21817/224079/68667/18821/235380/19222/54199/233979/12772/12766/20310/19229/252837	34
GO:0050819	negative regulation of coagulation	5/679	29/13456	0.0139755019533573	0.0815086334250534	0.0623509757122553	18591/18792/72828/21825/21824	5
GO:0072538	T-helper 17 type immune response	5/679	29/13456	0.0139755019533573	0.0815086334250534	0.0623509757122553	16950/16364/16193/19883/319817	5
GO:1900047	negative regulation of hemostasis	5/679	29/13456	0.0139755019533573	0.0815086334250534	0.0623509757122553	18591/18792/72828/21825/21824	5
GO:2000273	positive regulation of signaling receptor activity	5/679	29/13456	0.0139755019533573	0.0815086334250534	0.0623509757122553	15216/19739/15251/11839/20296	5
GO:0014066	regulation of phosphatidylinositol 3-kinase signaling	9/679	76/13456	0.0139812039073375	0.0815086334250534	0.0623509757122553	18591/19015/15170/22339/21926/12985/268857/18413/211323	9
GO:0045582	positive regulation of T cell differentiation	9/679	76/13456	0.0139812039073375	0.0815086334250534	0.0623509757122553	12522/14991/20963/12053/16193/16190/13655/12772/20668	9
GO:0046849	bone remodeling	9/679	76/13456	0.0139812039073375	0.0815086334250534	0.0623509757122553	20963/22339/16193/215653/20750/72828/353047/17342/19229	9
GO:0008277	regulation of G protein-coupled receptor signaling pathway	10/679	89/13456	0.0140025815769753	0.0815086334250534	0.0623509757122553	17295/56193/19739/64214/50778/19735/18578/244585/14764/105171	10
GO:0034763	negative regulation of transmembrane transport	10/679	89/13456	0.0140025815769753	0.0815086334250534	0.0623509757122553	11622/17869/21926/19735/16176/20912/100503659/18821/384783/21825	10
GO:0030323	respiratory tube development	14/679	144/13456	0.0140412726523621	0.0816294675779722	0.0624434092007982	16950/319939/15205/22339/13819/21926/16889/18128/26570/15901/16598/15364/12168/319817	14
GO:0010721	negative regulation of cell development	13/679	130/13456	0.014143062838792	0.0821163546456395	0.0628158591175135	14025/29869/15205/22339/11302/18186/18128/16176/22241/171207/12927/15901/15364	13
GO:0001558	regulation of cell growth	26/679	326/13456	0.0142358361178666	0.0825497146605463	0.0631473628936008	14025/19015/12576/235036/29869/55942/12053/50873/22339/74116/11302/18186/19735/11787/22241/171207/233489/16323/17755/170742/19229/110196/211323/12168/12983/629378	26
GO:0002228	natural killer cell mediated immunity	6/679	40/13456	0.0143194152998833	0.0827182467577016	0.0632762834785119	15170/14991/171285/74732/15040/667281	6
GO:0042267	natural killer cell mediated cytotoxicity	6/679	40/13456	0.0143194152998833	0.0827182467577016	0.0632762834785119	15170/14991/171285/74732/15040/667281	6
GO:0043300	regulation of leukocyte degranulation	6/679	40/13456	0.0143194152998833	0.0827182467577016	0.0632762834785119	109934/20963/16190/12772/68891/19204	6
GO:0048639	positive regulation of developmental growth	15/679	159/13456	0.014549595103568	0.0839413902553127	0.0642119413015851	21385/14025/19015/50873/22339/18186/18128/73094/19374/233489/17755/15364/110196/211323/12168	15
GO:0055072	iron ion homeostasis	8/679	64/13456	0.0147229096581977	0.0848337781824253	0.0648945838098842	15216/15251/17869/13819/53945/68428/14725/233489	8
GO:0043254	regulation of protein-containing complex assembly	28/679	359/13456	0.014832835746527	0.0853591255602922	0.0652964543875327	12576/15162/12122/17295/11303/12124/11622/56193/14026/68732/20963/72948/12759/15205/22339/21926/12125/24088/21916/22241/260409/101497/12985/59036/268857/17755/19229/99889	28
GO:1904062	regulation of cation transmembrane transport	20/679	234/13456	0.0149665556946461	0.0855309434059029	0.0654278884438828	15170/26556/11622/19739/83433/19735/19260/18578/72828/15945/20296/100503659/57780/18821/279561/16518/12856/12766/216856/19229	20
GO:0002886	regulation of myeloid leukocyte mediated immunity	7/679	52/13456	0.0149754309961566	0.0855309434059029	0.0654278884438828	109934/20963/16190/12772/68891/19204/15040	7
GO:0014033	neural crest cell differentiation	7/679	52/13456	0.0149754309961566	0.0855309434059029	0.0654278884438828	17311/15251/15205/20583/18186/18187/17684	7
GO:0048864	stem cell development	7/679	52/13456	0.0149754309961566	0.0855309434059029	0.0654278884438828	17311/15251/15205/20583/18186/18187/17684	7
GO:0050805	negative regulation of synaptic transmission	7/679	52/13456	0.0149754309961566	0.0855309434059029	0.0654278884438828	20620/50873/54393/16176/19225/18733/19229	7
GO:0051057	positive regulation of small GTPase mediated signal transduction	7/679	52/13456	0.0149754309961566	0.0855309434059029	0.0654278884438828	17311/212307/18128/17207/67168/244418/211323	7
GO:0009991	response to extracellular stimulus	22/679	265/13456	0.0151330717335017	0.0863229856276937	0.066033770339564	57875/235036/29869/15216/16956/14281/58809/20583/21425/17691/11910/227731/73094/20750/22241/75747/99586/52639/211389/68441/12096/14728	22
GO:0099536	synaptic signaling	36/679	490/13456	0.0151922908769365	0.0865523254966394	0.0662092065356773	26556/17295/19157/109934/20620/17069/50873/21926/54393/19262/16176/26570/20912/15572/19225/17920/13655/21983/20296/227120/13653/74732/235380/211612/217692/269642/12772/216856/27062/77531/18733/19229/211323/723827/387217/387174	36
GO:0002043	blood vessel endothelial cell proliferation involved in sprouting angiogenesis	3/679	11/13456	0.0155700367462925	0.0874334228422475	0.0668832121825351	22339/21825/67122	3
GO:0002070	epithelial cell maturation	3/679	11/13456	0.0155700367462925	0.0874334228422475	0.0668832121825351	15251/81879/19726	3
GO:0002923	regulation of humoral immune response mediated by circulating immunoglobulin	3/679	11/13456	0.0155700367462925	0.0874334228422475	0.0668832121825351	15170/21926/257632	3
GO:0045586	regulation of gamma-delta T cell differentiation	3/679	11/13456	0.0155700367462925	0.0874334228422475	0.0668832121825351	20963/13655/20668	3
GO:0045628	regulation of T-helper 2 cell differentiation	3/679	11/13456	0.0155700367462925	0.0874334228422475	0.0668832121825351	12053/16193/16190	3
GO:0045779	negative regulation of bone resorption	3/679	11/13456	0.0155700367462925	0.0874334228422475	0.0668832121825351	22339/16193/72828	3
GO:0046643	regulation of gamma-delta T cell activation	3/679	11/13456	0.0155700367462925	0.0874334228422475	0.0668832121825351	20963/13655/20668	3
GO:0046851	negative regulation of bone remodeling	3/679	11/13456	0.0155700367462925	0.0874334228422475	0.0668832121825351	22339/16193/72828	3
GO:0098792	xenophagy	3/679	11/13456	0.0155700367462925	0.0874334228422475	0.0668832121825351	24088/107607/257632	3
GO:0140131	positive regulation of lymphocyte chemotaxis	3/679	11/13456	0.0155700367462925	0.0874334228422475	0.0668832121825351	20303/12772/19229	3
GO:1902285	semaphorin-plexin signaling pathway involved in neuron projection guidance	3/679	11/13456	0.0155700367462925	0.0874334228422475	0.0668832121825351	18186/18187/140571	3
GO:0016358	dendrite development	20/679	235/13456	0.015614920108882	0.0874334228422475	0.0668832121825351	14025/17295/16560/20620/15529/110197/18186/16782/15572/17920/21983/231380/233489/217692/15901/59036/216856/17755/211323/16988	20
GO:0002064	epithelial cell development	16/679	175/13456	0.0156412545851187	0.0874334228422475	0.0668832121825351	18591/17295/15251/22339/21926/81879/18128/16176/21916/14284/17921/19143/12142/12571/19726/15901	16
GO:0090596	sensory organ morphogenesis	16/679	175/13456	0.0156412545851187	0.0874334228422475	0.0668832121825351	21385/18591/14686/109934/15251/17869/22339/29815/17921/58235/244585/17920/12142/17684/235542/16658	16
GO:0046165	alcohol biosynthetic process	11/679	104/13456	0.0156734782599459	0.0874334228422475	0.0668832121825351	13121/18106/56193/11307/12156/66234/13849/19204/19229/110196/208715	11
GO:0046328	regulation of JNK cascade	11/679	104/13456	0.0156734782599459	0.0874334228422475	0.0668832121825351	17873/21926/215653/16176/14013/19260/107607/59036/257632/19229/330177	11
GO:0071453	cellular response to oxygen levels	11/679	104/13456	0.0156734782599459	0.0874334228422475	0.0668832121825351	19155/19015/15251/17869/22339/13819/18128/19883/13653/17684/723827	11
GO:0007611	learning or memory	17/679	190/13456	0.0157975218200587	0.0880175267134728	0.0673300292221275	29813/13411/12227/15251/20620/50873/16176/26570/24088/15572/19225/21983/231380/13653/233489/211612/18733	17
GO:0051353	positive regulation of oxidoreductase activity	6/679	41/13456	0.0160795083195602	0.0885765718077724	0.0677576772592987	21926/16176/107607/12856/257632/19229	6
GO:0070527	platelet aggregation	6/679	41/13456	0.0160795083195602	0.0885765718077724	0.0677576772592987	15170/56193/20963/26570/20912/72828	6
GO:0001658	branching involved in ureteric bud morphogenesis	5/679	30/13456	0.0160924483490834	0.0885765718077724	0.0677576772592987	17869/22339/12156/22420/381157	5
GO:0010543	regulation of platelet activation	5/679	30/13456	0.0160924483490834	0.0885765718077724	0.0677576772592987	18591/56193/20963/21682/72828	5
GO:0019432	triglyceride biosynthetic process	5/679	30/13456	0.0160924483490834	0.0885765718077724	0.0677576772592987	16956/14245/17691/64898/231510	5
GO:0030857	negative regulation of epithelial cell differentiation	5/679	30/13456	0.0160924483490834	0.0885765718077724	0.0677576772592987	15205/22339/18128/15901/12443	5
GO:0032620	interleukin-17 production	5/679	30/13456	0.0160924483490834	0.0885765718077724	0.0677576772592987	16193/24088/16168/257632/18413	5
GO:0032735	positive regulation of interleukin-12 production	5/679	30/13456	0.0160924483490834	0.0885765718077724	0.0677576772592987	14991/20963/16994/24088/257632	5
GO:0050918	positive chemotaxis	5/679	30/13456	0.0160924483490834	0.0885765718077724	0.0677576772592987	17295/22339/18186/14725/140571	5
GO:0097028	dendritic cell differentiation	5/679	30/13456	0.0160924483490834	0.0885765718077724	0.0677576772592987	14991/16364/83433/381319/18733	5
GO:0035970	peptidyl-threonine dephosphorylation	4/679	20/13456	0.016315201589333	0.0893703942655158	0.0683649209671461	75590/319520/240672/235584	4
GO:0045684	positive regulation of epidermis development	4/679	20/13456	0.016315201589333	0.0893703942655158	0.0683649209671461	19015/18612/18755/18128	4
GO:1902932	positive regulation of alcohol biosynthetic process	4/679	20/13456	0.016315201589333	0.0893703942655158	0.0683649209671461	18106/11307/19204/110196	4
GO:2001169	regulation of ATP biosynthetic process	4/679	20/13456	0.016315201589333	0.0893703942655158	0.0683649209671461	17869/50873/83433/12495	4
GO:0002444	myeloid leukocyte mediated immunity	9/679	78/13456	0.0163839946426325	0.0895317450339296	0.0684883481112384	109934/20963/16797/16190/74732/12772/68891/19204/15040	9
GO:0071675	regulation of mononuclear cell migration	9/679	78/13456	0.0163839946426325	0.0895317450339296	0.0684883481112384	20303/57781/15945/20293/20296/21825/12772/76088/19229	9
GO:0003073	regulation of systemic arterial blood pressure	7/679	53/13456	0.0165272939330035	0.0899907200753969	0.0688394463993648	18591/11622/20112/21926/19277/78286/12168	7
GO:0031960	response to corticosteroid	7/679	53/13456	0.0165272939330035	0.0899907200753969	0.0688394463993648	83383/74747/67731/21926/16193/11839/77128	7
GO:0048644	muscle organ morphogenesis	7/679	53/13456	0.0165272939330035	0.0899907200753969	0.0688394463993648	71371/17069/107589/18128/14725/12156/14362	7
GO:0001667	ameboidal-type cell migration	25/679	315/13456	0.0169232543686104	0.0919396069520556	0.0703302700484229	18591/19015/17295/71371/17311/15251/14026/20620/20583/15370/22339/212307/21926/18186/18187/18128/171207/12927/19225/13655/21983/20130/21825/19229/12168	25
GO:1903305	regulation of regulated secretory pathway	12/679	119/13456	0.0169256130548819	0.0919396069520556	0.0703302700484229	19157/109934/20963/18128/20912/16190/17920/100503659/12772/68891/27062/19204	12
GO:0022411	cellular component disassembly	26/679	331/13456	0.0169824538837681	0.0921384148735545	0.070482350476764	18008/74747/56193/15251/14026/68732/17869/20583/50873/83433/212307/21926/329015/16193/21916/22241/271221/52639/66643/17386/17755/101612/211323/70381/53619/140810	26
GO:0070664	negative regulation of leukocyte proliferation	8/679	66/13456	0.0175081786555754	0.0948776538573561	0.0725777631486759	15170/14991/171285/20293/12142/213208/245126/12519	8
GO:0042445	hormone metabolic process	11/679	106/13456	0.0178586841650101	0.0965471856521687	0.0738548908836773	15216/72472/15251/77974/78925/12156/20750/99929/13653/16522/20148	11
GO:0046887	positive regulation of hormone secretion	11/679	106/13456	0.0178586841650101	0.0965471856521687	0.0738548908836773	19015/15216/15251/50873/54393/20750/235442/68667/384783/216856/18111	11
GO:0040013	negative regulation of locomotion	19/679	223/13456	0.017938308182863	0.0966480154989263	0.0739320218459088	18591/19015/109934/14026/57781/21926/106952/18186/18128/140571/171207/17342/20293/20130/17684/21825/13134/211323/105171	19
GO:0001961	positive regulation of cytokine-mediated signaling pathway	6/679	42/13456	0.0179834949753055	0.0966480154989263	0.0739320218459088	15251/50873/83433/54123/16177/77128	6
GO:0050873	brown fat cell differentiation	6/679	42/13456	0.0179834949753055	0.0966480154989263	0.0739320218459088	19735/14013/19225/242864/20668/442846	6
GO:0061333	renal tubule morphogenesis	6/679	42/13456	0.0179834949753055	0.0966480154989263	0.0739320218459088	17869/15205/22339/12156/22420/381157	6
GO:2000351	regulation of endothelial cell apoptotic process	6/679	42/13456	0.0179834949753055	0.0966480154989263	0.0739320218459088	57875/14991/21926/18569/20293/21825	6
GO:2000116	regulation of cysteine-type endopeptidase activity	16/679	178/13456	0.0181056282550075	0.0971896460103706	0.0743463483956864	12122/83383/20963/17869/15370/22339/21926/16193/12125/19225/79201/107607/215114/21825/223701/15511	16
GO:0030336	negative regulation of cell migration	17/679	193/13456	0.018166866172957	0.0973108029347859	0.074439028792034	18591/19015/109934/14026/57781/21926/106952/18128/140571/171207/17342/20293/20130/17684/21825/13134/211323	17
GO:0032890	regulation of organic acid transport	7/679	54/13456	0.0181895268303652	0.0973108029347859	0.074439028792034	20963/21926/54393/19735/16176/384783/21825	7
GO:0010876	lipid localization	26/679	333/13456	0.0181923315679927	0.0973108029347859	0.074439028792034	19015/11303/16956/74309/20493/20963/11307/21926/54393/16176/11981/26570/74152/26970/20750/71720/235527/17920/69863/384783/235283/21825/71795/16323/69573/16534	26
GO:0030003	cellular cation homeostasis	33/679	447/13456	0.0183381040739642	0.0978122922055151	0.0748226488335593	20302/15170/15216/14686/19216/15251/76137/17869/71398/227059/53945/68428/14725/16176/20750/20190/72828/67168/15945/20296/21817/224079/68667/18821/235380/19222/54199/233979/12772/12766/20310/19229/252837	33
GO:0098660	inorganic ion transmembrane transport	33/679	447/13456	0.0183381040739642	0.0978122922055151	0.0748226488335593	15170/15216/68279/11622/19739/76137/20273/83433/227059/53945/68428/227731/20515/19260/18578/20190/72828/15945/100503659/57780/68667/18821/279561/16518/16522/12856/16491/233979/12766/16534/19204/19229/214922	33
GO:0071526	semaphorin-plexin signaling pathway	5/679	31/13456	0.0184124560641627	0.0978122922055151	0.0748226488335593	17295/18186/18187/140571/387217	5
GO:0072132	mesenchyme morphogenesis	5/679	31/13456	0.0184124560641627	0.0978122922055151	0.0748226488335593	21385/17869/20583/18128/12156	5
GO:1902003	regulation of amyloid-beta formation	5/679	31/13456	0.0184124560641627	0.0978122922055151	0.0748226488335593	12759/11307/21926/239606/233489	5
GO:0008406	gonad development	14/679	149/13456	0.0184364997171204	0.0978122922055151	0.0748226488335593	12124/11622/71371/17311/380684/11504/22339/14725/12125/99929/17684/16323/15364/12443	14
GO:0043406	positive regulation of MAP kinase activity	14/679	149/13456	0.0184364997171204	0.0978122922055151	0.0748226488335593	18591/17295/17873/17311/20963/16012/22339/21926/12156/16176/21825/257632/19229/330177	14
GO:0120039	plasma membrane bounded cell projection morphogenesis	36/679	497/13456	0.0185019471311313	0.0980452425388937	0.0750008468963695	14025/29869/12032/17295/16560/67220/18612/76901/380684/14026/12759/15529/50873/22339/11302/18186/18187/16782/18128/14725/15572/11787/22241/19277/140571/171207/58235/21983/233489/217692/15901/59036/17755/330177/211323/12168	36
GO:0001952	regulation of cell-matrix adhesion	10/679	93/13456	0.0186183705821851	0.0984330114867673	0.0752974752562729	18792/12053/22339/18186/19262/11856/20130/21825/12571/19229	10
GO:1903959	regulation of anion transmembrane transport	10/679	93/13456	0.0186183705821851	0.0984330114867673	0.0752974752562729	17295/22612/17869/21926/19735/16176/20912/384783/21825/19204	10
GO:0009611	response to wounding	27/679	350/13456	0.0187851177242462	0.0991993687711936	0.0758837091608335	18591/19015/15170/279028/56193/380684/15251/14026/20963/18792/20583/107589/22339/21926/16193/26570/20912/21682/72828/20296/21825/223701/12495/12772/21824/100042498/14728	27
GO:0050770	regulation of axonogenesis	13/679	135/13456	0.0188509068997429	0.0994314347712976	0.0760612307426354	14025/29869/22339/11302/18186/22241/140571/171207/233489/217692/17755/211323/12168	13
GO:0045637	regulation of myeloid cell differentiation	16/679	179/13456	0.0189900491172971	0.0998200591850522	0.0763585135010991	20302/17311/15251/14281/17869/83433/21926/215653/72828/16909/17342/12985/12571/16323/19229/16658	16
GO:0030183	B cell differentiation	11/679	107/13456	0.019032666068035	0.0998200591850522	0.0763585135010991	14025/15170/11622/20963/12053/16193/19374/12142/321019/12051/19229	11
GO:0050768	negative regulation of neurogenesis	11/679	107/13456	0.019032666068035	0.0998200591850522	0.0763585135010991	14025/29869/15205/11302/18186/18128/16176/22241/171207/15901/15364	11
GO:0046330	positive regulation of JNK cascade	8/679	67/13456	0.0190342292119124	0.0998200591850522	0.0763585135010991	17873/21926/215653/16176/107607/257632/19229/330177	8
GO:0070227	lymphocyte apoptotic process	8/679	67/13456	0.0190342292119124	0.0998200591850522	0.0763585135010991	15251/17869/227059/20612/12125/79201/384783/76088	8
GO:1903793	positive regulation of anion transport	29/679	383/13456	0.0191791544608881	0.100464339592592	0.0768513632809856	19015/15216/17295/11303/15251/50873/83433/11307/21926/54393/16193/14725/16176/19260/24088/20750/19225/20296/235442/68667/384783/269642/77128/17386/216856/16534/19204/18111/11727	29
GO:0003203	endocardial cushion morphogenesis	4/679	21/13456	0.0193683780028693	0.101106487005804	0.0773425814020903	21385/20583/18128/12156	4
GO:0046639	negative regulation of alpha-beta T cell differentiation	4/679	21/13456	0.0193683780028693	0.101106487005804	0.0773425814020903	16950/12053/16190/319817	4
GO:1903204	negative regulation of oxidative stress-induced neuron death	4/679	21/13456	0.0193683780028693	0.101106487005804	0.0773425814020903	15251/50873/26570/14362	4
GO:0006874	cellular calcium ion homeostasis	24/679	303/13456	0.0194176032595989	0.10118868186623	0.0774054573151164	20302/15170/14686/19216/76137/16176/20750/20190/72828/67168/15945/20296/21817/224079/68667/18821/19222/54199/233979/12772/12766/20310/19229/252837	24
GO:0042493	response to drug	14/679	150/13456	0.0194285825903087	0.10118868186623	0.0774054573151164	20303/14281/78925/17869/107589/21926/16176/18578/99586/17920/11810/16323/14362/620246	14
GO:0010951	negative regulation of endopeptidase activity	10/679	94/13456	0.0199289388107132	0.102593285466441	0.0784799251510009	15370/22339/21926/16193/20713/19225/233489/21825/223701/15511	10
GO:0033674	positive regulation of kinase activity	28/679	368/13456	0.0199450837553356	0.102593285466441	0.0784799251510009	18591/12576/17295/17873/23834/17311/20963/12759/16012/22339/21926/215653/12156/16176/11839/15505/16797/13653/21825/213452/257632/69068/19229/330177/211323/12443/232801/11727	28
GO:0045685	regulation of glial cell differentiation	7/679	55/13456	0.0199657731280328	0.102593285466441	0.0784799251510009	15205/18128/19262/12156/16176/24088/15364	7
GO:0070509	calcium ion import	7/679	55/13456	0.0199657731280328	0.102593285466441	0.0784799251510009	18591/26556/76137/15205/20293/18821/279561	7
GO:0002827	positive regulation of T-helper 1 type immune response	3/679	12/13456	0.0199941474113785	0.102593285466441	0.0784799251510009	16177/16176/12772	3
GO:0030502	negative regulation of bone mineralization	3/679	12/13456	0.0199941474113785	0.102593285466441	0.0784799251510009	15251/68667/19229	3
GO:0030730	sequestering of triglyceride	3/679	12/13456	0.0199941474113785	0.102593285466441	0.0784799251510009	16956/21926/16176	3
GO:0034755	iron ion transmembrane transport	3/679	12/13456	0.0199941474113785	0.102593285466441	0.0784799251510009	15216/53945/68428	3
GO:0043951	negative regulation of cAMP-mediated signaling	3/679	12/13456	0.0199941474113785	0.102593285466441	0.0784799251510009	19735/70461/18576	3
GO:0044851	hair cycle phase	3/679	12/13456	0.0199941474113785	0.102593285466441	0.0784799251510009	19015/18128/19225	3
GO:0051350	negative regulation of lyase activity	3/679	12/13456	0.0199941474113785	0.102593285466441	0.0784799251510009	54393/74191/110789	3
GO:0006887	exocytosis	23/679	288/13456	0.0200127946464824	0.102593285466441	0.0784799251510009	15162/19157/109934/56193/74190/20963/50873/74760/68428/18128/20912/16797/16190/75767/17920/100503659/235442/74732/12772/68891/27062/19204/76166	23
GO:0006826	iron ion transport	6/679	43/13456	0.0200363424384153	0.102593285466441	0.0784799251510009	15216/53945/68428/14725/58235/66532	6
GO:0045669	positive regulation of osteoblast differentiation	6/679	43/13456	0.0200363424384153	0.102593285466441	0.0784799251510009	22339/16193/80752/12156/12393/12168	6
GO:0046850	regulation of bone remodeling	6/679	43/13456	0.0200363424384153	0.102593285466441	0.0784799251510009	20963/22339/16193/20750/72828/353047	6
GO:1901216	positive regulation of neuron death	11/679	108/13456	0.0202628731284595	0.103636627506458	0.0792780417610219	20302/17865/74747/14281/12759/21926/209456/12125/16176/13653/233489	11
GO:0006109	regulation of carbohydrate metabolic process	14/679	151/13456	0.0204605180982436	0.104420491686658	0.0798776677688154	18591/18106/74747/56193/15251/17869/50873/17691/16193/19883/271221/384783/19204/19229	14
GO:0048812	neuron projection morphogenesis	35/679	484/13456	0.0204620119913223	0.104420491686658	0.0798776677688154	14025/29869/12032/17295/16560/18612/76901/380684/14026/12759/15529/50873/22339/11302/18186/18187/16782/18128/14725/15572/11787/22241/19277/140571/171207/58235/21983/233489/217692/15901/59036/17755/330177/211323/12168	35
GO:0071229	cellular response to acid chemical	9/679	81/13456	0.0205359356868668	0.104680379895429	0.0800764722722409	71962/50873/22339/21926/75747/16598/723827/68441/387174	9
GO:2000117	negative regulation of cysteine-type endopeptidase activity	8/679	68/13456	0.0206529172336194	0.105158925332702	0.0804425411619133	15370/22339/21926/16193/19225/21825/223701/15511	8
GO:0008015	blood circulation	23/679	289/13456	0.0207502694768617	0.105536566099077	0.0807314218517594	18591/17295/109934/20303/11622/15251/20112/22339/13819/21926/19735/18578/19277/19225/240672/68667/17201/18821/16518/78286/16598/19204/12168	23
GO:0031098	stress-activated protein kinase signaling cascade	17/679	196/13456	0.0208011341152869	0.105559378475792	0.0807488724442515	17295/17873/20963/22339/21926/215653/12156/16176/14013/19260/15505/79201/107607/59036/257632/19229/330177	17
GO:0046777	protein autophosphorylation	17/679	196/13456	0.0208011341152869	0.105559378475792	0.0807488724442515	18591/13549/15162/29869/17295/22612/20963/22339/11302/12747/98267/215653/21682/22241/279561/19229/330177	17
GO:1903203	regulation of oxidative stress-induced neuron death	5/679	32/13456	0.0209424373583878	0.106158101175257	0.0812068723262768	15251/50873/21926/26570/14362	5
GO:0015908	fatty acid transport	10/679	95/13456	0.0213057087529747	0.107879406277576	0.0825236046541073	19015/20963/21926/54393/16176/26570/26970/17920/384783/21825	10
GO:0051271	negative regulation of cellular component movement	18/679	212/13456	0.0215155683274831	0.108820963363004	0.0832438596810692	18591/19015/12576/109934/14026/57781/21926/106952/18128/140571/171207/17342/20293/20130/17684/21825/13134/211323	18
GO:0030101	natural killer cell activation	7/679	56/13456	0.0218595415671312	0.110315557886454	0.0843871671187654	18106/171285/19260/16168/12142/74732/15040	7
GO:0045123	cellular extravasation	7/679	56/13456	0.0218595415671312	0.110315557886454	0.0843871671187654	109934/21926/16177/20296/12772/68891/19204	7
GO:0052548	regulation of endopeptidase activity	19/679	228/13456	0.0220725122767896	0.111155130731375	0.0850294081165919	12122/83383/20963/17869/15370/22339/21926/16193/12125/20713/19225/79201/107607/233489/215114/21825/17196/223701/15511	19
GO:0046545	development of primary female sexual characteristics	9/679	82/13456	0.0220747447673909	0.111155130731375	0.0850294081165919	11622/71371/17311/380684/11504/22339/99929/16323/13134	9
GO:0072507	divalent inorganic cation homeostasis	26/679	339/13456	0.0222343531390874	0.111507689359343	0.0852991019333795	20302/15170/14686/19216/76137/227059/16176/20750/20190/72828/67168/15945/20296/21817/224079/68667/18821/19222/54199/233979/12772/12766/20310/19229/94219/252837	26
GO:0061045	negative regulation of wound healing	6/679	44/13456	0.0222427464715034	0.111507689359343	0.0852991019333795	18591/18792/21926/72828/21825/21824	6
GO:1903202	negative regulation of oxidative stress-induced cell death	6/679	44/13456	0.0222427464715034	0.111507689359343	0.0852991019333795	17295/15251/50873/26570/15505/14362	6
GO:2000107	negative regulation of leukocyte apoptotic process	6/679	44/13456	0.0222427464715034	0.111507689359343	0.0852991019333795	17311/15251/227059/384783/76088/257632	6
GO:0008202	steroid metabolic process	17/679	198/13456	0.0227130916753636	0.112692727326377	0.086205610488312	13121/11303/78925/20583/11307/21926/16889/19682/12156/20750/66234/19883/99929/69863/13653/110196/208715	17
GO:0001783	B cell apoptotic process	4/679	22/13456	0.0227514535177814	0.112692727326377	0.086205610488312	17869/227059/12125/384783	4
GO:0002861	regulation of inflammatory response to antigenic stimulus	4/679	22/13456	0.0227514535177814	0.112692727326377	0.086205610488312	21926/213208/257632/15040	4
GO:0006925	inflammatory cell apoptotic process	4/679	22/13456	0.0227514535177814	0.112692727326377	0.086205610488312	16193/26570/102595/257632	4
GO:0006953	acute-phase response	4/679	22/13456	0.0227514535177814	0.112692727326377	0.086205610488312	21926/16193/16176/19225	4
GO:0030212	hyaluronan metabolic process	4/679	22/13456	0.0227514535177814	0.112692727326377	0.086205610488312	18591/209378/16176/16168	4
GO:0032770	positive regulation of monooxygenase activity	4/679	22/13456	0.0227514535177814	0.112692727326377	0.086205610488312	21926/16176/107607/19229	4
GO:0043032	positive regulation of macrophage activation	4/679	22/13456	0.0227514535177814	0.112692727326377	0.086205610488312	171285/83433/16190/21825	4
GO:0090344	negative regulation of cell aging	4/679	22/13456	0.0227514535177814	0.112692727326377	0.086205610488312	20620/12053/12571/15364	4
GO:1901889	negative regulation of cell junction assembly	4/679	22/13456	0.0227514535177814	0.112692727326377	0.086205610488312	21926/16176/24088/11856	4
GO:1902230	negative regulation of intrinsic apoptotic signaling pathway in response to DNA damage	4/679	22/13456	0.0227514535177814	0.112692727326377	0.086205610488312	29813/12122/12759/20583	4
GO:0045055	regulated exocytosis	16/679	183/13456	0.0228618151496357	0.113116285392545	0.0865296161498797	19157/109934/56193/20963/18128/20912/16797/16190/75767/17920/100503659/74732/12772/68891/27062/19204	16
GO:0048592	eye morphogenesis	11/679	110/13456	0.0228977760657411	0.113171201575737	0.086571624921963	21385/18591/14686/15251/22339/29815/58235/244585/12142/17684/235542	11
GO:0098662	inorganic cation transmembrane transport	31/679	422/13456	0.0231405089036784	0.114246850899722	0.0873944553640463	15170/15216/68279/11622/19739/76137/20273/83433/227059/53945/68428/227731/19260/18578/20190/72828/15945/100503659/57780/68667/18821/279561/16518/16522/12856/16491/233979/12766/16534/19229/214922	31
GO:0048873	homeostasis of number of cells within a tissue	5/679	33/13456	0.0236886710976496	0.116602494148232	0.0891964320234834	22339/16889/18128/213208/12772	5
GO:1902229	regulation of intrinsic apoptotic signaling pathway in response to DNA damage	5/679	33/13456	0.0236886710976496	0.116602494148232	0.0891964320234834	29813/12122/12759/20583/68428	5
GO:0051928	positive regulation of calcium ion transport	9/679	83/13456	0.0236944874971693	0.116602494148232	0.0891964320234834	18591/26556/20303/107589/15945/20293/279561/12766/232801	9
GO:0002764	immune response-regulating signaling pathway	14/679	154/13456	0.0238046325792668	0.116855197733786	0.0893897405659431	15170/14991/18755/20963/227059/19260/24088/18578/21682/12927/213208/16534/17060/319817	14
GO:0030073	insulin secretion	14/679	154/13456	0.0238046325792668	0.116855197733786	0.0893897405659431	19015/15251/50873/21926/16193/16176/20912/18576/68667/384783/19726/216856/18111/667118	14
GO:0060249	anatomical structure homeostasis	25/679	325/13456	0.0238513693090644	0.116855197733786	0.0893897405659431	26556/15251/20963/17869/22339/13819/16889/16193/18128/98956/269346/140917/20750/72828/19225/353047/279561/17196/30877/213208/12772/257632/19229/110789/381417	25
GO:0072503	cellular divalent inorganic cation homeostasis	25/679	325/13456	0.0238513693090644	0.116855197733786	0.0893897405659431	20302/15170/14686/19216/76137/227059/16176/20750/20190/72828/67168/15945/20296/21817/224079/68667/18821/19222/54199/233979/12772/12766/20310/19229/252837	25
GO:0034103	regulation of tissue remodeling	7/679	57/13456	0.0238741946160855	0.116855197733786	0.0893897405659431	109934/20963/22339/16193/20750/72828/353047	7
GO:0048015	phosphatidylinositol-mediated signaling	12/679	125/13456	0.0239780212397738	0.117237328338829	0.0896820558100194	18591/19015/15170/22339/21926/18705/12985/227120/268857/19204/18413/211323	12
GO:0061387	regulation of extent of cell growth	10/679	97/13456	0.0242647332722429	0.118511873235246	0.0906570337300423	14025/29869/22339/11302/18186/22241/171207/17755/211323/12168	10
GO:1903169	regulation of calcium ion transmembrane transport	11/679	111/13456	0.0243053263128398	0.118582899652783	0.0907113662129791	15170/11622/19739/19260/18578/72828/15945/100503659/18821/12766/19229	11
GO:0021675	nerve development	6/679	45/13456	0.0246071135576383	0.119584970953558	0.0914779122917333	15205/18186/18187/17684/78286/16658	6
GO:0045744	negative regulation of G protein-coupled receptor signaling pathway	6/679	45/13456	0.0246071135576383	0.119584970953558	0.0914779122917333	17295/56193/19735/18578/244585/105171	6
GO:0043409	negative regulation of MAPK cascade	13/679	140/13456	0.0246519864377894	0.119584970953558	0.0914779122917333	15170/19735/11910/16176/14013/19260/15505/75590/319520/240672/59036/235584/330177	13
GO:1905952	regulation of lipid localization	13/679	140/13456	0.0246519864377894	0.119584970953558	0.0914779122917333	19015/11303/16956/20963/11307/21926/54393/16176/20750/69863/384783/21825/69573	13
GO:0002281	macrophage activation involved in immune response	3/679	13/13456	0.0250361329786338	0.119584970953558	0.0914779122917333	171285/20963/83433	3
GO:0002716	negative regulation of natural killer cell mediated immunity	3/679	13/13456	0.0250361329786338	0.119584970953558	0.0914779122917333	14991/171285/15040	3
GO:0010885	regulation of cholesterol storage	3/679	13/13456	0.0250361329786338	0.119584970953558	0.0914779122917333	19015/16956/69863	3
GO:0016045	detection of bacterium	3/679	13/13456	0.0250361329786338	0.119584970953558	0.0914779122917333	24088/107607/257632	3
GO:0032494	response to peptidoglycan	3/679	13/13456	0.0250361329786338	0.119584970953558	0.0914779122917333	83433/24088/257632	3
GO:0036315	cellular response to sterol	3/679	13/13456	0.0250361329786338	0.119584970953558	0.0914779122917333	19883/235283/16323	3
GO:0045618	positive regulation of keratinocyte differentiation	3/679	13/13456	0.0250361329786338	0.119584970953558	0.0914779122917333	18612/18755/18128	3
GO:0045953	negative regulation of natural killer cell mediated cytotoxicity	3/679	13/13456	0.0250361329786338	0.119584970953558	0.0914779122917333	14991/171285/15040	3
GO:0048266	behavioral response to pain	3/679	13/13456	0.0250361329786338	0.119584970953558	0.0914779122917333	21825/246228/18413	3
GO:0048875	chemical homeostasis within a tissue	3/679	13/13456	0.0250361329786338	0.119584970953558	0.0914779122917333	26556/22339/13819	3
GO:0061323	cell proliferation involved in heart morphogenesis	3/679	13/13456	0.0250361329786338	0.119584970953558	0.0914779122917333	15205/18128/12168	3
GO:0070886	positive regulation of calcineurin-NFAT signaling cascade	3/679	13/13456	0.0250361329786338	0.119584970953558	0.0914779122917333	21926/211323/100504518	3
GO:0072210	metanephric nephron development	3/679	13/13456	0.0250361329786338	0.119584970953558	0.0914779122917333	18591/15205/13653	3
GO:0106058	positive regulation of calcineurin-mediated signaling	3/679	13/13456	0.0250361329786338	0.119584970953558	0.0914779122917333	21926/211323/100504518	3
GO:2000136	regulation of cell proliferation involved in heart morphogenesis	3/679	13/13456	0.0250361329786338	0.119584970953558	0.0914779122917333	15205/18128/12168	3
GO:2001171	positive regulation of ATP biosynthetic process	3/679	13/13456	0.0250361329786338	0.119584970953558	0.0914779122917333	17869/50873/83433	3
GO:0045766	positive regulation of angiogenesis	12/679	126/13456	0.0253363956588743	0.120765730931095	0.0923811483489185	15251/22339/18186/16176/12226/226841/20130/21825/12766/15364/19229/387217	12
GO:1904018	positive regulation of vasculature development	12/679	126/13456	0.0253363956588743	0.120765730931095	0.0923811483489185	15251/22339/18186/16176/12226/226841/20130/21825/12766/15364/19229/387217	12
GO:0031532	actin cytoskeleton reorganization	9/679	84/13456	0.0253971960665744	0.120928908467622	0.0925059729004934	15162/56193/14245/18186/226751/12927/12985/217692/19229	9
GO:0055074	calcium ion homeostasis	24/679	311/13456	0.0255831731891861	0.121687151888375	0.0930860000108098	20302/15170/14686/19216/76137/16176/20750/20190/72828/67168/15945/20296/21817/224079/68667/18821/19222/54199/233979/12772/12766/20310/19229/252837	24
GO:0030218	erythrocyte differentiation	11/679	112/13456	0.0257748054499469	0.122470683098286	0.0936853713091137	15251/12053/22339/13819/208638/16909/17684/12571/16323/16598/16658	11
GO:0055021	regulation of cardiac muscle tissue growth	7/679	58/13456	0.0260129376202902	0.123473297234162	0.0944523326358816	21385/74116/19735/18128/16468/17684/110196	7
GO:0010001	glial cell differentiation	15/679	171/13456	0.0262919641239238	0.124125432102076	0.0949511907764471	18591/72948/12759/15205/83433/18128/19262/12156/16176/24088/14733/225608/15364/211323/20668	15
GO:0048738	cardiac muscle tissue development	15/679	171/13456	0.0262919641239238	0.124125432102076	0.0949511907764471	21385/17295/17069/22339/74116/17691/19735/18128/14725/12156/16468/18821/17684/110196/211323	15
GO:0007268	chemical synaptic transmission	33/679	460/13456	0.0264353390801092	0.124125432102076	0.0949511907764471	26556/17295/19157/109934/20620/50873/21926/54393/19262/16176/26570/20912/15572/19225/17920/13655/21983/20296/227120/13653/74732/235380/211612/217692/269642/12772/216856/27062/18733/19229/723827/387217/387174	33
GO:0098916	anterograde trans-synaptic signaling	33/679	460/13456	0.0264353390801092	0.124125432102076	0.0949511907764471	26556/17295/19157/109934/20620/50873/21926/54393/19262/16176/26570/20912/15572/19225/17920/13655/21983/20296/227120/13653/74732/235380/211612/217692/269642/12772/216856/27062/18733/19229/723827/387217/387174	33
GO:0015872	dopamine transport	4/679	23/13456	0.0264718743309765	0.124125432102076	0.0949511907764471	50873/54393/12495/269642	4
GO:0043302	positive regulation of leukocyte degranulation	4/679	23/13456	0.0264718743309765	0.124125432102076	0.0949511907764471	20963/16190/68891/19204	4
GO:0045737	positive regulation of cyclin-dependent protein serine/threonine kinase activity	4/679	23/13456	0.0264718743309765	0.124125432102076	0.0949511907764471	18591/12576/23834/12443	4
GO:0048483	autonomic nervous system development	4/679	23/13456	0.0264718743309765	0.124125432102076	0.0949511907764471	15205/18186/18187/78286	4
GO:0070498	interleukin-1-mediated signaling pathway	4/679	23/13456	0.0264718743309765	0.124125432102076	0.0949511907764471	16193/16177/16176/13653	4
GO:1902692	regulation of neuroblast proliferation	4/679	23/13456	0.0264718743309765	0.124125432102076	0.0949511907764471	15251/22339/18128/242620	4
GO:0001656	metanephros development	5/679	34/13456	0.0266567809556161	0.124125432102076	0.0949511907764471	18591/17869/15205/13653/381157	5
GO:0031640	killing of cells of other organism	5/679	34/13456	0.0266567809556161	0.124125432102076	0.0949511907764471	20963/12125/15945/20296/20310	5
GO:0032965	regulation of collagen biosynthetic process	5/679	34/13456	0.0266567809556161	0.124125432102076	0.0949511907764471	18591/19015/16193/20296/210719	5
GO:0036475	neuron death in response to oxidative stress	5/679	34/13456	0.0266567809556161	0.124125432102076	0.0949511907764471	15251/50873/21926/26570/14362	5
GO:0042446	hormone biosynthetic process	5/679	34/13456	0.0266567809556161	0.124125432102076	0.0949511907764471	15216/15251/78925/12156/13653	5
GO:0048246	macrophage chemotaxis	5/679	34/13456	0.0266567809556161	0.124125432102076	0.0949511907764471	20302/20293/20296/21825/19229	5
GO:0032870	cellular response to hormone stimulus	27/679	361/13456	0.0266715062101404	0.124125432102076	0.0949511907764471	19015/83383/16956/74747/15468/14245/67731/15370/64898/18128/19262/16176/29815/18576/12927/75747/16909/235442/384783/16323/77128/12702/104263/15364/224829/12096/442846	27
GO:0001906	cell killing	12/679	127/13456	0.0267502304244588	0.124125432102076	0.0949511907764471	15170/14991/171285/20963/12125/12509/15945/20296/74732/20310/15040/667281	12
GO:0010675	regulation of cellular carbohydrate metabolic process	12/679	127/13456	0.0267502304244588	0.124125432102076	0.0949511907764471	18106/74747/56193/15251/50873/17691/16193/19883/271221/384783/19204/19229	12
GO:0048017	inositol lipid-mediated signaling	12/679	127/13456	0.0267502304244588	0.124125432102076	0.0949511907764471	18591/19015/15170/22339/21926/18705/12985/227120/268857/19204/18413/211323	12
GO:0048736	appendage development	12/679	127/13456	0.0267502304244588	0.124125432102076	0.0949511907764471	21385/18128/12125/14013/26570/68099/244585/12393/73692/12168/319817/140810	12
GO:0060173	limb development	12/679	127/13456	0.0267502304244588	0.124125432102076	0.0949511907764471	21385/18128/12125/14013/26570/68099/244585/12393/73692/12168/319817/140810	12
GO:0035904	aorta development	6/679	46/13456	0.0271335449524698	0.125375284176106	0.0959072796352229	21385/15205/107589/18128/14725/12142	6
GO:0050771	negative regulation of axonogenesis	6/679	46/13456	0.0271335449524698	0.125375284176106	0.0959072796352229	14025/29869/11302/18186/22241/171207	6
GO:0071677	positive regulation of mononuclear cell migration	6/679	46/13456	0.0271335449524698	0.125375284176106	0.0959072796352229	20303/15945/20296/12772/76088/19229	6
GO:2000191	regulation of fatty acid transport	6/679	46/13456	0.0271335449524698	0.125375284176106	0.0959072796352229	20963/21926/54393/16176/384783/21825	6
GO:0043255	regulation of carbohydrate biosynthetic process	9/679	85/13456	0.0271848430320335	0.125375284176106	0.0959072796352229	18591/18106/56193/15251/17691/16193/384783/19204/19229	9
GO:0060419	heart growth	9/679	85/13456	0.0271848430320335	0.125375284176106	0.0959072796352229	21385/11622/74116/19735/18128/75590/16468/17684/110196	9
GO:0007224	smoothened signaling pathway	11/679	113/13456	0.0273075771478096	0.125813857466427	0.0962427713668808	15205/67590/68099/19883/269209/244585/268935/12393/231214/211612/140810	11
GO:0006639	acylglycerol metabolic process	10/679	99/13456	0.0275088496265236	0.126278456644532	0.0965981719036424	16956/14245/110197/17691/64898/14933/231510/11810/227333/11727	10
GO:0009791	post-embryonic development	10/679	99/13456	0.0275088496265236	0.126278456644532	0.0965981719036424	11622/71371/22339/12125/14013/17921/269209/99929/12142/319817	10
GO:0010811	positive regulation of cell-substrate adhesion	10/679	99/13456	0.0275088496265236	0.126278456644532	0.0965981719036424	18591/68732/22339/18186/20750/13612/20130/21825/12571/19229	10
GO:0043588	skin development	15/679	172/13456	0.0275193824673496	0.126278456644532	0.0965981719036424	19015/17295/18612/18755/16994/21926/18128/14284/20190/19143/19225/56338/83925/16323/105171	15
GO:2000146	negative regulation of cell motility	17/679	203/13456	0.0280753685845902	0.128453504985181	0.0982620003910317	18591/19015/109934/14026/57781/21926/106952/18128/140571/171207/17342/20293/20130/17684/21825/13134/211323	17
GO:0042100	B cell proliferation	8/679	72/13456	0.0281062589993936	0.128453504985181	0.0982620003910317	11622/17079/12053/227059/19374/12142/384783/321019	8
GO:0048709	oligodendrocyte differentiation	8/679	72/13456	0.0281062589993936	0.128453504985181	0.0982620003910317	72948/12759/15205/18128/19262/24088/211323/20668	8
GO:0062014	negative regulation of small molecule metabolic process	8/679	72/13456	0.0281062589993936	0.128453504985181	0.0982620003910317	74747/56193/20583/17691/16193/266645/12156/12495	8
GO:0051222	positive regulation of protein transport	20/679	250/13456	0.0282327175969004	0.128853991217126	0.0985683569850737	19015/15251/50873/83433/11307/21926/16193/14725/19260/24088/19225/20296/68667/384783/77128/17386/216856/16534/18111/11727	20
GO:0034754	cellular hormone metabolic process	7/679	59/13456	0.0282788087051645	0.128853991217126	0.0985683569850737	77974/78925/12156/20750/99929/13653/20148	7
GO:0045453	bone resorption	7/679	59/13456	0.0282788087051645	0.128853991217126	0.0985683569850737	20963/22339/16193/20750/72828/353047/19229	7
GO:0002705	positive regulation of leukocyte mediated immunity	11/679	114/13456	0.0289049752843231	0.131444003490748	0.100549616952038	14991/58185/21926/16193/16177/16176/20296/68891/257632/19204/15040	11
GO:0050864	regulation of B cell activation	11/679	114/13456	0.0289049752843231	0.131444003490748	0.100549616952038	15170/11622/20963/12053/16193/227059/242248/12142/384783/321019/257632	11
GO:0006638	neutral lipid metabolic process	10/679	100/13456	0.0292418341592885	0.132710697002075	0.101518588863857	16956/14245/110197/17691/64898/14933/231510/11810/227333/11727	10
GO:0071901	negative regulation of protein serine/threonine kinase activity	10/679	100/13456	0.0292418341592885	0.132710697002075	0.101518588863857	12576/15170/83383/19735/16176/19260/75590/319520/240672/235584	10
GO:0000768	syncytium formation by plasma membrane fusion	6/679	47/13456	0.0298258226613048	0.133964099329125	0.102477393529911	13549/67220/83433/16190/15945/226841	6
GO:0002711	positive regulation of T cell mediated immunity	6/679	47/13456	0.0298258226613048	0.133964099329125	0.102477393529911	14991/58185/16193/16177/16176/15040	6
GO:0140253	cell-cell fusion	6/679	47/13456	0.0298258226613048	0.133964099329125	0.102477393529911	13549/67220/83433/16190/15945/226841	6
GO:0030858	positive regulation of epithelial cell differentiation	5/679	35/13456	0.0298517190968721	0.133964099329125	0.102477393529911	18612/18755/18128/12226/19726	5
GO:0042531	positive regulation of tyrosine phosphorylation of STAT protein	5/679	35/13456	0.0298517190968721	0.133964099329125	0.102477393529911	15205/21926/16193/16168/18413	5
GO:0060135	maternal process involved in female pregnancy	5/679	35/13456	0.0298517190968721	0.133964099329125	0.102477393529911	171285/19225/12142/17684/12168	5
GO:0070169	positive regulation of biomineral tissue development	5/679	35/13456	0.0298517190968721	0.133964099329125	0.102477393529911	80752/12156/22420/12168/110789	5
GO:1905521	regulation of macrophage migration	5/679	35/13456	0.0298517190968721	0.133964099329125	0.102477393529911	57781/83433/20296/21825/19229	5
GO:0008361	regulation of cell size	14/679	159/13456	0.0302597661822004	0.133964099329125	0.102477393529911	14025/29869/11622/56193/22339/11302/18186/22241/171207/279561/17755/16534/211323/12168	14
GO:0000096	sulfur amino acid metabolic process	4/679	24/13456	0.0305353670760784	0.133964099329125	0.102477393529911	67873/26570/22117/66902	4
GO:0002335	mature B cell differentiation	4/679	24/13456	0.0305353670760784	0.133964099329125	0.102477393529911	16193/321019/12051/19229	4
GO:0002360	T cell lineage commitment	4/679	24/13456	0.0305353670760784	0.133964099329125	0.102477393529911	16950/16364/16193/19374	4
GO:0035909	aorta morphogenesis	4/679	24/13456	0.0305353670760784	0.133964099329125	0.102477393529911	21385/15205/107589/18128	4
GO:0043372	positive regulation of CD4-positive	alpha-beta T cell differentiation	4/679	24/13456	0.0305353670760784	0.133964099329125	0.102477393529911	12522/16193/16190/12772	4
GO:0045742	positive regulation of epidermal growth factor receptor signaling pathway	4/679	24/13456	0.0305353670760784	0.133964099329125	0.102477393529911	29815/11839/215114/227333	4
GO:0071634	regulation of transforming growth factor beta production	4/679	24/13456	0.0305353670760784	0.133964099329125	0.102477393529911	17295/15251/19225/21825	4
GO:0048839	inner ear development	11/679	115/13456	0.0305683015746148	0.133964099329125	0.102477393529911	12576/109934/15205/18128/12156/17921/244585/17920/15040/110789/16658	11
GO:0010822	positive regulation of mitochondrion organization	7/679	60/13456	0.0306746694565105	0.133964099329125	0.102477393529911	12122/12124/15251/50873/83433/12125/22654	7
GO:0016239	positive regulation of macroautophagy	7/679	60/13456	0.0306746694565105	0.133964099329125	0.102477393529911	15251/50873/24088/22241/75747/107607/257632	7
GO:0032922	circadian regulation of gene expression	7/679	60/13456	0.0306746694565105	0.133964099329125	0.102477393529911	11622/79362/19883/13653/17201/15901/12916	7
GO:0035249	synaptic transmission	glutamatergic	7/679	60/13456	0.0306746694565105	0.133964099329125	0.102477393529911	26556/50873/19225/20296/12772/216856/19229	7
GO:0050766	positive regulation of phagocytosis	7/679	60/13456	0.0306746694565105	0.133964099329125	0.102477393529911	109934/83433/21926/16176/16168/20296/257632	7
GO:0061515	myeloid cell development	7/679	60/13456	0.0306746694565105	0.133964099329125	0.102477393529911	29813/15170/12053/80752/24088/17684/16598	7
GO:0002295	T-helper cell lineage commitment	3/679	14/13456	0.0306952011424159	0.133964099329125	0.102477393529911	16950/16364/16193	3
GO:0006978	DNA damage response	signal transduction by p53 class mediator resulting in transcription of p21 class mediator	3/679	14/13456	0.0306952011424159	0.133964099329125	0.102477393529911	29813/83383/28019	3
GO:0010918	positive regulation of mitochondrial membrane potential	3/679	14/13456	0.0306952011424159	0.133964099329125	0.102477393529911	12122/17869/50873	3
GO:0032656	regulation of interleukin-13 production	3/679	14/13456	0.0306952011424159	0.133964099329125	0.102477393529911	16364/15040/232801	3
GO:0035729	cellular response to hepatocyte growth factor stimulus	3/679	14/13456	0.0306952011424159	0.133964099329125	0.102477393529911	16193/18186/12927	3
GO:0036336	dendritic cell migration	3/679	14/13456	0.0306952011424159	0.133964099329125	0.102477393529911	68667/321019/76088	3
GO:0042492	gamma-delta T cell differentiation	3/679	14/13456	0.0306952011424159	0.133964099329125	0.102477393529911	20963/13655/20668	3
GO:0043652	engulfment of apoptotic cell	3/679	14/13456	0.0306952011424159	0.133964099329125	0.102477393529911	69288/83433/21825	3
GO:0044068	modulation by symbiont of host cellular process	3/679	14/13456	0.0306952011424159	0.133964099329125	0.102477393529911	29869/12125/22241	3
GO:0048745	smooth muscle tissue development	3/679	14/13456	0.0306952011424159	0.133964099329125	0.102477393529911	11622/107589/99929	3
GO:0055119	relaxation of cardiac muscle	3/679	14/13456	0.0306952011424159	0.133964099329125	0.102477393529911	19735/18578/16518	3
GO:0060343	trabecula formation	3/679	14/13456	0.0306952011424159	0.133964099329125	0.102477393529911	11504/22339/53945	3
GO:0071404	cellular response to low-density lipoprotein particle stimulus	3/679	14/13456	0.0306952011424159	0.133964099329125	0.102477393529911	16956/20963/208715	3
GO:0071549	cellular response to dexamethasone stimulus	3/679	14/13456	0.0306952011424159	0.133964099329125	0.102477393529911	83383/74747/67731	3
GO:0071880	adenylate cyclase-activating adrenergic receptor signaling pathway	3/679	14/13456	0.0306952011424159	0.133964099329125	0.102477393529911	18578/18821/105171	3
GO:0098543	detection of other organism	3/679	14/13456	0.0306952011424159	0.133964099329125	0.102477393529911	24088/107607/257632	3
GO:1901881	positive regulation of protein depolymerization	3/679	14/13456	0.0306952011424159	0.133964099329125	0.102477393529911	18008/56193/68732	3
GO:0048667	cell morphogenesis involved in neuron differentiation	32/679	449/13456	0.0308507879522305	0.134514163561833	0.102898171552711	14025/29869/17295/16560/18612/380684/14026/15529/15205/22339/11302/18186/18187/16782/18128/14725/15572/11787/22241/19277/17921/140571/171207/58235/21983/233489/217692/15901/59036/17755/211323/12168	32
GO:0032231	regulation of actin filament bundle assembly	9/679	87/13456	0.031022516839287	0.134998419370874	0.103268608657583	17295/56193/14026/68732/50873/18186/11856/72754/15901	9
GO:0015849	organic acid transport	16/679	190/13456	0.0310328827520979	0.134998419370874	0.103268608657583	19015/20493/20963/17869/21926/54393/19735/14725/16176/26570/74152/26970/208638/17920/384783/21825	16
GO:0002224	toll-like receptor signaling pathway	10/679	101/13456	0.0310508227331515	0.134998419370874	0.103268608657583	171285/58185/16364/21926/71398/54123/19260/24088/12475/257632	10
GO:0032535	regulation of cellular component size	24/679	317/13456	0.0311211448406801	0.135046188097975	0.103305149900125	14025/29869/11622/56193/14026/68732/22339/11302/18186/24088/21916/22241/171207/260409/101497/12985/233489/279561/17755/16534/19229/211323/12168/99889	24
GO:0048568	embryonic organ development	24/679	317/13456	0.0311211448406801	0.135046188097975	0.103305149900125	21385/18591/109934/11622/17311/15251/17869/15205/22339/21425/13819/18128/17921/19143/16909/17920/226841/12142/12393/231214/17684/12702/16658/140810	24
GO:0045834	positive regulation of lipid metabolic process	11/679	116/13456	0.0322988232523928	0.140023088995135	0.107112288039013	18591/19015/57875/11307/21926/16176/19225/384783/257632/19229/110196	11
GO:0043010	camera-type eye development	19/679	238/13456	0.0324876299573391	0.140707603773366	0.107635915568008	21385/18591/12576/14686/11622/15251/22339/18186/227731/29815/21916/58235/244585/17342/231214/17684/16323/387217/12168	19
GO:0001654	eye development	21/679	270/13456	0.0326522579513055	0.141169860191921	0.107989523983645	21385/18591/12576/14686/11622/15251/22339/18186/227731/29815/21916/58235/244585/17342/12142/231214/17684/16323/235542/387217/12168	21
GO:0099537	trans-synaptic signaling	33/679	468/13456	0.0326592367335361	0.141169860191921	0.107989523983645	26556/17295/19157/109934/20620/50873/21926/54393/19262/16176/26570/20912/15572/19225/17920/13655/21983/20296/227120/13653/74732/235380/211612/217692/269642/12772/216856/27062/18733/19229/723827/387217/387174	33
GO:0006879	cellular iron ion homeostasis	6/679	48/13456	0.0326873973291486	0.141169860191921	0.107989523983645	15216/15251/17869/53945/68428/14725	6
GO:0014065	phosphatidylinositol 3-kinase signaling	10/679	102/13456	0.032937293956965	0.142114276864554	0.108711966485049	18591/19015/15170/22339/21926/18705/12985/268857/18413/211323	10
GO:2001235	positive regulation of apoptotic signaling pathway	12/679	131/13456	0.0329828464375372	0.142176057749687	0.108759226490603	12122/12759/17869/21926/68428/11910/20612/12125/83925/21825/16323/18413	12
GO:0038034	signal transduction in absence of ligand	7/679	61/13456	0.0332031963965696	0.142771292090184	0.109214557911925	17311/20583/21926/12125/16176/79201/16323	7
GO:0097192	extrinsic apoptotic signaling pathway in absence of ligand	7/679	61/13456	0.0332031963965696	0.142771292090184	0.109214557911925	17311/20583/21926/12125/16176/79201/16323	7
GO:0001782	B cell homeostasis	5/679	36/13456	0.033277755032444	0.142771292090184	0.109214557911925	11622/15251/12125/18733/319817	5
GO:0031646	positive regulation of nervous system process	5/679	36/13456	0.033277755032444	0.142771292090184	0.109214557911925	72948/16193/216856/19204/211323	5
GO:0110151	positive regulation of biomineralization	5/679	36/13456	0.033277755032444	0.142771292090184	0.109214557911925	80752/12156/22420/12168/110789	5
GO:0051223	regulation of protein transport	31/679	436/13456	0.0341221042002724	0.146255949453522	0.111880187029935	13121/19015/58185/15251/50873/83433/11307/21926/16193/14725/16176/26570/19260/24088/18576/75767/19225/20296/68667/384783/233489/19726/225608/77128/17386/216856/16534/18111/11727/667118/99889	31
GO:0051495	positive regulation of cytoskeleton organization	15/679	177/13456	0.0343010091111172	0.146882841839951	0.112359735641143	12576/15162/18008/17295/56193/14026/68732/18186/260409/12985/72754/15901/17755/19229/99889	15
GO:0050871	positive regulation of B cell activation	8/679	75/13456	0.0347908911060677	0.146882841839951	0.112359735641143	20963/12053/16193/227059/12142/384783/321019/257632	8
GO:0007411	axon guidance	13/679	147/13456	0.0348563719580849	0.146882841839951	0.112359735641143	18612/14026/22339/18186/18187/16782/18128/14725/11787/19277/140571/58235/12168	13
GO:0097485	neuron projection guidance	13/679	147/13456	0.0348563719580849	0.146882841839951	0.112359735641143	18612/14026/22339/18186/18187/16782/18128/14725/11787/19277/140571/58235/12168	13
GO:0006694	steroid biosynthetic process	10/679	103/13456	0.0349026738458433	0.146882841839951	0.112359735641143	13121/78925/20583/11307/21926/12156/66234/13653/110196/208715	10
GO:0007416	synapse assembly	10/679	103/13456	0.0349026738458433	0.146882841839951	0.112359735641143	18591/24088/58235/12217/17920/21983/217692/14362/216856/211323	10
GO:0008630	intrinsic apoptotic signaling pathway in response to DNA damage	10/679	103/13456	0.0349026738458433	0.146882841839951	0.112359735641143	29813/12122/74747/12759/17869/20583/21926/68428/12125/12051	10
GO:0050680	negative regulation of epithelial cell proliferation	10/679	103/13456	0.0349026738458433	0.146882841839951	0.112359735641143	19015/12576/18612/20583/21926/20293/21825/12571/268857/12766	10
GO:0001893	maternal placenta development	4/679	25/13456	0.0349459836802871	0.146882841839951	0.112359735641143	19225/12142/17684/12168	4
GO:0002478	antigen processing and presentation of exogenous peptide antigen	4/679	25/13456	0.0349459836802871	0.146882841839951	0.112359735641143	13034/14991/15001/15040	4
GO:0003351	epithelial cilium movement involved in extracellular fluid movement	4/679	25/13456	0.0349459836802871	0.146882841839951	0.112359735641143	13411/269209/19726/320277	4
GO:0032958	inositol phosphate biosynthetic process	4/679	25/13456	0.0349459836802871	0.146882841839951	0.112359735641143	18106/56193/19204/19229	4
GO:0034123	positive regulation of toll-like receptor signaling pathway	4/679	25/13456	0.0349459836802871	0.146882841839951	0.112359735641143	58185/71398/19260/24088	4
GO:0045672	positive regulation of osteoclast differentiation	4/679	25/13456	0.0349459836802871	0.146882841839951	0.112359735641143	20302/14281/83433/21926	4
GO:0055022	negative regulation of cardiac muscle tissue growth	4/679	25/13456	0.0349459836802871	0.146882841839951	0.112359735641143	74116/19735/16468/17684	4
GO:0061117	negative regulation of heart growth	4/679	25/13456	0.0349459836802871	0.146882841839951	0.112359735641143	74116/19735/16468/17684	4
GO:0071402	cellular response to lipoprotein particle stimulus	4/679	25/13456	0.0349459836802871	0.146882841839951	0.112359735641143	16956/20963/11307/208715	4
GO:0090312	positive regulation of protein deacetylation	4/679	25/13456	0.0349459836802871	0.146882841839951	0.112359735641143	14245/12053/22339/81703	4
GO:1902914	regulation of protein polyubiquitination	4/679	25/13456	0.0349459836802871	0.146882841839951	0.112359735641143	50873/19260/211949/257632	4
GO:1903115	regulation of actin filament-based movement	4/679	25/13456	0.0349459836802871	0.146882841839951	0.112359735641143	18578/68667/18821/16518	4
GO:1904031	positive regulation of cyclin-dependent protein kinase activity	4/679	25/13456	0.0349459836802871	0.146882841839951	0.112359735641143	18591/12576/23834/12443	4
GO:0006898	receptor-mediated endocytosis	16/679	193/13456	0.0351265336142117	0.147505517538645	0.112836058648099	15216/20963/12759/22339/14725/20612/73094/22241/17920/544817/233489/215114/241576/233979/12475/227333	16
GO:0006942	regulation of striated muscle contraction	6/679	49/13456	0.0357213780191906	0.149589432146601	0.114430173328313	19735/18578/68667/18821/16518/21957	6
GO:0006949	syncytium formation	6/679	49/13456	0.0357213780191906	0.149589432146601	0.114430173328313	13549/67220/83433/16190/15945/226841	6
GO:0060415	muscle tissue morphogenesis	6/679	49/13456	0.0357213780191906	0.149589432146601	0.114430173328313	17069/107589/18128/14725/12156/14362	6
GO:1901796	regulation of signal transduction by p53 class mediator	7/679	62/13456	0.0358668732688904	0.150060668308813	0.114790650903144	29813/20583/50873/68428/110109/67239/59014	7
GO:0150063	visual system development	21/679	273/13456	0.0361563777930298	0.150372287280338	0.115029027454296	21385/18591/12576/14686/11622/15251/22339/18186/227731/29815/21916/58235/244585/17342/12142/231214/17684/16323/235542/387217/12168	21
GO:0007626	locomotory behavior	14/679	163/13456	0.0362793647848032	0.150372287280338	0.115029027454296	29813/20273/50873/21916/15572/17920/231380/13653/17201/216856/78286/211323/105171/620246	14
GO:0007254	JNK cascade	12/679	133/13456	0.0364606939950783	0.150372287280338	0.115029027454296	17873/20963/21926/215653/16176/14013/19260/107607/59036/257632/19229/330177	12
GO:0044089	positive regulation of cellular component biogenesis	29/679	405/13456	0.0365312091295651	0.150372287280338	0.115029027454296	12576/12122/17295/11303/12124/11622/56193/14026/68732/20963/72948/12759/22339/21926/18186/12125/22241/353047/21983/260409/12985/72754/15901/216856/17755/53860/19229/140810/99889	29
GO:0090407	organophosphate biosynthetic process	27/679	372/13456	0.0368995296328009	0.150372287280338	0.115029027454296	18591/12709/19015/18106/56193/14245/22169/17869/110197/14450/50873/83433/18719/14933/110639/80914/99010/231510/18705/67375/226518/12495/19204/19229/110196/227333/208715	27
GO:0032873	negative regulation of stress-activated MAPK cascade	5/679	37/13456	0.0369384693237368	0.150372287280338	0.115029027454296	14013/19260/15505/59036/330177	5
GO:0045581	negative regulation of T cell differentiation	5/679	37/13456	0.0369384693237368	0.150372287280338	0.115029027454296	16950/12053/16190/319817/67122	5
GO:0048645	animal organ formation	5/679	37/13456	0.0369384693237368	0.150372287280338	0.115029027454296	15205/18128/14725/12156/17684	5
GO:0055117	regulation of cardiac muscle contraction	5/679	37/13456	0.0369384693237368	0.150372287280338	0.115029027454296	19735/18578/68667/18821/16518	5
GO:0061756	leukocyte adhesion to vascular endothelial cell	5/679	37/13456	0.0369384693237368	0.150372287280338	0.115029027454296	54446/21926/16193/12772/19204	5
GO:0070303	negative regulation of stress-activated protein kinase signaling cascade	5/679	37/13456	0.0369384693237368	0.150372287280338	0.115029027454296	14013/19260/15505/59036/330177	5
GO:0120163	negative regulation of cold-induced thermogenesis	5/679	37/13456	0.0369384693237368	0.150372287280338	0.115029027454296	18128/16168/227120/15901/105171	5
GO:2000772	regulation of cellular senescence	5/679	37/13456	0.0369384693237368	0.150372287280338	0.115029027454296	14991/20620/12053/12571/15364	5
GO:0050728	negative regulation of inflammatory response	10/679	104/13456	0.0369483329507259	0.150372287280338	0.115029027454296	19015/109934/57781/19883/23959/213208/13024/268857/12702/257632	10
GO:0002719	negative regulation of cytokine production involved in immune response	3/679	15/13456	0.0369654194786244	0.150372287280338	0.115029027454296	15216/12053/21926	3
GO:0003085	negative regulation of systemic arterial blood pressure	3/679	15/13456	0.0369654194786244	0.150372287280338	0.115029027454296	11622/21926/12168	3
GO:0008209	androgen metabolic process	3/679	15/13456	0.0369654194786244	0.150372287280338	0.115029027454296	78925/20750/99929	3
GO:0010878	cholesterol storage	3/679	15/13456	0.0369654194786244	0.150372287280338	0.115029027454296	19015/16956/69863	3
GO:0010888	negative regulation of lipid storage	3/679	15/13456	0.0369654194786244	0.150372287280338	0.115029027454296	19015/11307/69863	3
GO:0019048	modulation by virus of host process	3/679	15/13456	0.0369654194786244	0.150372287280338	0.115029027454296	17869/12125/68441	3
GO:0033033	negative regulation of myeloid cell apoptotic process	3/679	15/13456	0.0369654194786244	0.150372287280338	0.115029027454296	17311/23845/257632	3
GO:0034162	toll-like receptor 9 signaling pathway	3/679	15/13456	0.0369654194786244	0.150372287280338	0.115029027454296	171285/58185/19260	3
GO:0035728	response to hepatocyte growth factor	3/679	15/13456	0.0369654194786244	0.150372287280338	0.115029027454296	16193/18186/12927	3
GO:0042772	DNA damage response	signal transduction resulting in transcription	3/679	15/13456	0.0369654194786244	0.150372287280338	0.115029027454296	29813/83383/28019	3
GO:0045056	transcytosis	3/679	15/13456	0.0369654194786244	0.150372287280338	0.115029027454296	14725/233489/19204	3
GO:0046325	negative regulation of glucose import	3/679	15/13456	0.0369654194786244	0.150372287280338	0.115029027454296	17869/21926/20912	3
GO:0048268	clathrin coat assembly	3/679	15/13456	0.0369654194786244	0.150372287280338	0.115029027454296	73094/233489/215114	3
GO:0048670	regulation of collateral sprouting	3/679	15/13456	0.0369654194786244	0.150372287280338	0.115029027454296	14025/29869/22241	3
GO:1901550	regulation of endothelial cell development	3/679	15/13456	0.0369654194786244	0.150372287280338	0.115029027454296	22339/21926/16176	3
GO:1902176	negative regulation of oxidative stress-induced intrinsic apoptotic signaling pathway	3/679	15/13456	0.0369654194786244	0.150372287280338	0.115029027454296	15251/50873/15505	3
GO:1903140	regulation of establishment of endothelial barrier	3/679	15/13456	0.0369654194786244	0.150372287280338	0.115029027454296	22339/21926/16176	3
GO:0090100	positive regulation of transmembrane receptor protein serine/threonine kinase signaling pathway	8/679	76/13456	0.0372390896000359	0.151350299874432	0.115777169545976	15216/15205/18128/12156/17684/21825/16323/12168	8
GO:0048880	sensory system development	21/679	274/13456	0.037384232642907	0.151804662792607	0.116124739736829	21385/18591/12576/14686/11622/15251/22339/18186/227731/29815/21916/58235/244585/17342/12142/231214/17684/16323/235542/387217/12168	21
GO:0031667	response to nutrient levels	19/679	242/13456	0.0375450428473674	0.152321778111601	0.116520313105443	57875/29869/15216/16956/58809/20583/21425/17691/11910/227731/73094/20750/22241/75747/99586/52639/211389/68441/12096	19
GO:0090257	regulation of muscle system process	14/679	164/13456	0.0379098731731156	0.153664953414089	0.117547790651607	67731/74116/19735/18128/18578/20190/19225/68667/16468/18821/16518/19204/110196/21957	14
GO:0003013	circulatory system process	23/679	307/13456	0.0379727479455624	0.153782872462811	0.117637994197341	18591/17295/109934/20303/11622/15251/20112/22339/13819/21926/19735/18578/19277/19225/240672/68667/17201/18821/16518/78286/16598/19204/12168	23
GO:0002526	acute inflammatory response	7/679	63/13456	0.0386679841401218	0.156043141671839	0.119367013377681	21926/12511/16193/16176/19225/213208/15040	7
GO:0008593	regulation of Notch signaling pathway	7/679	63/13456	0.0386679841401218	0.156043141671839	0.119367013377681	12053/15205/18128/244418/257632/69068/67122	7
GO:0034121	regulation of toll-like receptor signaling pathway	7/679	63/13456	0.0386679841401218	0.156043141671839	0.119367013377681	58185/16364/71398/54123/19260/24088/257632	7
GO:0090288	negative regulation of cellular response to growth factor stimulus	7/679	63/13456	0.0386679841401218	0.156043141671839	0.119367013377681	18128/14725/12509/14733/22057/21825/14362	7
GO:0007584	response to nutrient	6/679	50/13456	0.0389305238440357	0.156963458403942	0.120071020349699	16956/20583/20750/99586/211389/12096	6
GO:0008217	regulation of blood pressure	10/679	105/13456	0.0390755836054134	0.157269722875192	0.120305300913684	18591/11622/20112/21926/19277/19225/17201/78286/19204/12168	10
GO:0048675	axon extension	10/679	105/13456	0.0390755836054134	0.157269722875192	0.120305300913684	29869/22339/11302/18186/18187/22241/171207/17755/211323/12168	10
GO:0017157	regulation of exocytosis	14/679	165/13456	0.03959215899995	0.158685187215836	0.121388076799091	19157/109934/20963/50873/18128/20912/16190/17920/100503659/235442/12772/68891/27062/19204	14
GO:0000027	ribosomal large subunit assembly	4/679	26/13456	0.0397061573459661	0.158685187215836	0.121388076799091	235036/110109/67239/59014	4
GO:0030279	negative regulation of ossification	4/679	26/13456	0.0397061573459661	0.158685187215836	0.121388076799091	15251/18128/68667/19229	4
GO:0031063	regulation of histone deacetylation	4/679	26/13456	0.0397061573459661	0.158685187215836	0.121388076799091	14245/12053/22339/81703	4
GO:0051955	regulation of amino acid transport	4/679	26/13456	0.0397061573459661	0.158685187215836	0.121388076799091	21926/54393/19735/16176	4
GO:0061005	cell differentiation involved in kidney development	4/679	26/13456	0.0397061573459661	0.158685187215836	0.121388076799091	18591/15205/18128/19277	4
GO:0071604	transforming growth factor beta production	4/679	26/13456	0.0397061573459661	0.158685187215836	0.121388076799091	17295/15251/19225/21825	4
GO:1901186	positive regulation of ERBB signaling pathway	4/679	26/13456	0.0397061573459661	0.158685187215836	0.121388076799091	29815/11839/215114/227333	4
GO:0019218	regulation of steroid metabolic process	8/679	77/13456	0.0398004246600954	0.158922397414697	0.121569533495471	20583/11307/21926/12156/19883/69863/13653/110196	8
GO:0051090	regulation of DNA-binding transcription factor activity	24/679	325/13456	0.039861813671827	0.158969048951646	0.121605220130433	15162/71371/15468/171285/18755/20963/12759/15205/22339/17691/21926/16193/16176/24088/70461/269209/107607/12985/73845/15901/14362/268857/257632/15364	24
GO:0002244	hematopoietic progenitor cell differentiation	11/679	120/13456	0.0399168767468655	0.158969048951646	0.121605220130433	15170/15205/22339/18128/66614/17684/12571/16323/104759/68519/59014	11
GO:0010508	positive regulation of autophagy	11/679	120/13456	0.0399168767468655	0.158969048951646	0.121605220130433	12122/15251/20620/50873/21425/12125/24088/22241/75747/107607/257632	11
GO:0010677	negative regulation of cellular carbohydrate metabolic process	5/679	38/13456	0.0408367518014844	0.161642516695962	0.123650320328888	74747/56193/50873/17691/16193	5
GO:0010883	regulation of lipid storage	5/679	38/13456	0.0408367518014844	0.161642516695962	0.123650320328888	19015/16956/11307/69863/69573	5
GO:0016925	protein sumoylation	5/679	38/13456	0.0408367518014844	0.161642516695962	0.123650320328888	14025/11624/68667/13653/30877	5
GO:0035690	cellular response to drug	5/679	38/13456	0.0408367518014844	0.161642516695962	0.123650320328888	20303/17869/107589/16176/18578	5
GO:0042461	photoreceptor cell development	5/679	38/13456	0.0408367518014844	0.161642516695962	0.123650320328888	18591/14686/22339/244585/12142	5
GO:0072583	clathrin-dependent endocytosis	5/679	38/13456	0.0408367518014844	0.161642516695962	0.123650320328888	20612/73094/233489/215114/227333	5
GO:1903307	positive regulation of regulated secretory pathway	5/679	38/13456	0.0408367518014844	0.161642516695962	0.123650320328888	20963/16190/68891/27062/19204	5
GO:0033673	negative regulation of kinase activity	16/679	197/13456	0.041179332753543	0.162856926754238	0.124579297406118	12576/15170/83383/17873/50873/16193/19735/16176/19260/19277/75590/319520/72828/240672/384783/235584	16
GO:0000079	regulation of cyclin-dependent protein serine/threonine kinase activity	7/679	64/13456	0.0416086073221124	0.163984745047841	0.125442035107357	18591/12576/83383/23834/12452/218630/12443	7
GO:0008589	regulation of smoothened signaling pathway	7/679	64/13456	0.0416086073221124	0.163984745047841	0.125442035107357	68099/19883/269209/244585/268935/12393/140810	7
GO:0032945	negative regulation of mononuclear cell proliferation	7/679	64/13456	0.0416086073221124	0.163984745047841	0.125442035107357	15170/14991/171285/12142/213208/245126/12519	7
GO:0050672	negative regulation of lymphocyte proliferation	7/679	64/13456	0.0416086073221124	0.163984745047841	0.125442035107357	15170/14991/171285/12142/213208/245126/12519	7
GO:0045927	positive regulation of growth	18/679	229/13456	0.041717131413383	0.164270226811176	0.12566041769757	21385/14025/19015/11622/50873/22339/18186/81879/18128/73094/19374/233489/17755/15364/19229/110196/211323/12168	18
GO:0002768	immune response-regulating cell surface receptor signaling pathway	13/679	151/13456	0.0418905719332201	0.164810616629229	0.126073795164529	15170/14991/18755/20963/227059/19260/24088/18578/21682/12927/16534/17060/319817	13
GO:0051347	positive regulation of transferase activity	31/679	444/13456	0.0419713308252575	0.164985749496176	0.126207765084949	18591/12576/17295/17873/23834/17311/20963/12759/17869/16012/230779/22339/21926/215653/12156/16176/11839/15505/16797/13653/21825/213452/257632/69068/19229/330177/211323/12443/232801/11727/105171	31
GO:0042475	odontogenesis of dentin-containing tooth	6/679	51/13456	0.0423172374041126	0.16605867643407	0.127028513006175	80752/12156/12125/58235/22420/12393	6
GO:0070228	regulation of lymphocyte apoptotic process	6/679	51/13456	0.0423172374041126	0.16605867643407	0.127028513006175	15251/17869/227059/20612/384783/76088	6
GO:0051346	negative regulation of hydrolase activity	19/679	246/13456	0.0431578003023539	0.168533252857224	0.128921468978748	14038/57875/11622/15370/22339/74116/21926/16193/209378/19735/20713/140571/19225/107895/233489/21825/223701/78709/15511	19
GO:2001233	regulation of apoptotic signaling pathway	24/679	328/13456	0.0435694094736363	0.168533252857224	0.128921468978748	29813/12122/15251/12759/17869/20583/50873/22339/21926/18186/68428/11910/20612/12125/16176/15505/19225/79201/83925/21825/16323/223701/18413/414801	24
GO:0001837	epithelial to mesenchymal transition	10/679	107/13456	0.0435798021661001	0.168533252857224	0.128921468978748	16950/15251/20583/22339/18569/16193/18128/12156/16176/629378	10
GO:0001911	negative regulation of leukocyte mediated cytotoxicity	3/679	16/13456	0.0438364172633905	0.168533252857224	0.128921468978748	14991/171285/15040	3
GO:0001963	synaptic transmission	dopaminergic	3/679	16/13456	0.0438364172633905	0.168533252857224	0.128921468978748	50873/19225/269642	3
GO:0002902	regulation of B cell apoptotic process	3/679	16/13456	0.0438364172633905	0.168533252857224	0.128921468978748	17869/227059/384783	3
GO:0003176	aortic valve development	3/679	16/13456	0.0438364172633905	0.168533252857224	0.128921468978748	18128/12156/12168	3
GO:0003181	atrioventricular valve morphogenesis	3/679	16/13456	0.0438364172633905	0.168533252857224	0.128921468978748	18128/12156/12168	3
GO:0003272	endocardial cushion formation	3/679	16/13456	0.0438364172633905	0.168533252857224	0.128921468978748	20583/18128/12156	3
GO:0003309	type B pancreatic cell differentiation	3/679	16/13456	0.0438364172633905	0.168533252857224	0.128921468978748	12571/19726/667118	3
GO:0010863	positive regulation of phospholipase C activity	3/679	16/13456	0.0438364172633905	0.168533252857224	0.128921468978748	11856/19204/11727	3
GO:0021983	pituitary gland development	3/679	16/13456	0.0438364172633905	0.168533252857224	0.128921468978748	15205/12156/15364	3
GO:0032616	interleukin-13 production	3/679	16/13456	0.0438364172633905	0.168533252857224	0.128921468978748	16364/15040/232801	3
GO:0035116	embryonic hindlimb morphogenesis	3/679	16/13456	0.0438364172633905	0.168533252857224	0.128921468978748	18128/14013/244585	3
GO:0043094	cellular metabolic compound salvage	3/679	16/13456	0.0438364172633905	0.168533252857224	0.128921468978748	67873/80914/66902	3
GO:0043373	CD4-positive	alpha-beta T cell lineage commitment	3/679	16/13456	0.0438364172633905	0.168533252857224	0.128921468978748	16950/16364/16193	3
GO:0044321	response to leptin	3/679	16/13456	0.0438364172633905	0.168533252857224	0.128921468978748	15468/14725/12443	3
GO:0045838	positive regulation of membrane potential	3/679	16/13456	0.0438364172633905	0.168533252857224	0.128921468978748	12122/17869/50873	3
GO:0046629	gamma-delta T cell activation	3/679	16/13456	0.0438364172633905	0.168533252857224	0.128921468978748	20963/13655/20668	3
GO:0071542	dopaminergic neuron differentiation	3/679	16/13456	0.0438364172633905	0.168533252857224	0.128921468978748	15251/22339/242620	3
GO:0071548	response to dexamethasone	3/679	16/13456	0.0438364172633905	0.168533252857224	0.128921468978748	83383/74747/67731	3
GO:0090026	positive regulation of monocyte chemotaxis	3/679	16/13456	0.0438364172633905	0.168533252857224	0.128921468978748	15945/20296/12772	3
GO:0099174	regulation of presynapse organization	3/679	16/13456	0.0438364172633905	0.168533252857224	0.128921468978748	233489/14362/216856	3
GO:2000251	positive regulation of actin cytoskeleton reorganization	3/679	16/13456	0.0438364172633905	0.168533252857224	0.128921468978748	15162/18186/12985	3
GO:0097191	extrinsic apoptotic signaling pathway	15/679	183/13456	0.04395159805682	0.168833480468055	0.129151131576248	12122/17311/20583/22339/21926/18186/11910/20612/12125/16176/79201/83925/21825/16323/414801	15
GO:0034101	erythrocyte homeostasis	11/679	122/13456	0.0441591203284141	0.169202285972173	0.129433253629624	15251/12053/22339/13819/208638/16909/17684/12571/16323/16598/16658	11
GO:0061351	neural precursor cell proliferation	11/679	122/13456	0.0441591203284141	0.169202285972173	0.129433253629624	16560/12227/15251/22339/18128/14725/16176/19883/242620/15364/68519	11
GO:2000241	regulation of reproductive process	11/679	122/13456	0.0441591203284141	0.169202285972173	0.129433253629624	12576/18792/20112/22339/18128/14764/17684/16323/19204/18413/243866	11
GO:0010827	regulation of glucose transmembrane transport	7/679	65/13456	0.0446906101132731	0.169615002181553	0.129748965686934	17295/22612/17869/21926/16176/20912/384783	7
GO:0032024	positive regulation of insulin secretion	7/679	65/13456	0.0446906101132731	0.169615002181553	0.129748965686934	19015/15251/50873/68667/384783/216856/18111	7
GO:1903825	organic acid transmembrane transport	9/679	93/13456	0.0447573604893792	0.169615002181553	0.129748965686934	17869/21926/19735/14725/26570/74152/208638/384783/21825	9
GO:1905039	carboxylic acid transmembrane transport	9/679	93/13456	0.0447573604893792	0.169615002181553	0.129748965686934	17869/21926/19735/14725/26570/74152/208638/384783/21825	9
GO:0002066	columnar/cuboidal epithelial cell development	4/679	27/13456	0.0448167675720956	0.169615002181553	0.129748965686934	15251/12142/12571/19726	4
GO:0032647	regulation of interferon-alpha production	4/679	27/13456	0.0448167675720956	0.169615002181553	0.129748965686934	171285/54123/19260/268857	4
GO:0033032	regulation of myeloid cell apoptotic process	4/679	27/13456	0.0448167675720956	0.169615002181553	0.129748965686934	17311/26570/23845/257632	4
GO:0038084	vascular endothelial growth factor signaling pathway	4/679	27/13456	0.0448167675720956	0.169615002181553	0.129748965686934	18591/22339/18186/18187	4
GO:0071300	cellular response to retinoic acid	4/679	27/13456	0.0448167675720956	0.169615002181553	0.129748965686934	22612/11303/19229/243866	4
GO:0071385	cellular response to glucocorticoid stimulus	4/679	27/13456	0.0448167675720956	0.169615002181553	0.129748965686934	83383/74747/67731/77128	4
GO:1901532	regulation of hematopoietic progenitor cell differentiation	4/679	27/13456	0.0448167675720956	0.169615002181553	0.129748965686934	15205/22339/18128/12571	4
GO:0050807	regulation of synapse organization	14/679	168/13456	0.0449568944040883	0.169615002181553	0.129748965686934	26556/16560/21926/18187/26570/24088/19277/58235/21983/233489/217692/14362/216856/239027	14
GO:0006695	cholesterol biosynthetic process	5/679	39/13456	0.0449748039615848	0.169615002181553	0.129748965686934	13121/11307/66234/110196/208715	5
GO:0030193	regulation of blood coagulation	5/679	39/13456	0.0449748039615848	0.169615002181553	0.129748965686934	18591/18792/72828/21825/21824	5
GO:0045058	T cell selection	5/679	39/13456	0.0449748039615848	0.169615002181553	0.129748965686934	16950/16364/20963/16193/16168	5
GO:0045778	positive regulation of ossification	5/679	39/13456	0.0449748039615848	0.169615002181553	0.129748965686934	80752/12156/12393/12168/110789	5
GO:1902041	regulation of extrinsic apoptotic signaling pathway via death domain receptors	5/679	39/13456	0.0449748039615848	0.169615002181553	0.129748965686934	11910/79201/83925/21825/414801	5
GO:1902653	secondary alcohol biosynthetic process	5/679	39/13456	0.0449748039615848	0.169615002181553	0.129748965686934	13121/11307/66234/110196/208715	5
GO:1902991	regulation of amyloid precursor protein catabolic process	5/679	39/13456	0.0449748039615848	0.169615002181553	0.129748965686934	12759/11307/21926/239606/233489	5
GO:0010975	regulation of neuron projection development	28/679	396/13456	0.0450139195797918	0.169621988350341	0.12975430983788	14025/29869/17295/16560/15529/15205/110197/11504/22339/11302/16193/18186/19735/20713/15572/22241/140571/171207/233489/13803/217692/15901/14362/244418/17755/19229/211323/12168	28
GO:0070201	regulation of establishment of protein localization	32/679	464/13456	0.0451920717060659	0.170152448640209	0.130160091596941	13121/19015/58185/15251/50873/83433/11307/21926/16193/14725/16176/26570/19260/24088/15505/18576/75767/19225/20296/68667/384783/233489/19726/225608/77128/17386/216856/16534/18111/11727/667118/99889	32
GO:0051209	release of sequestered calcium ion into cytosol	8/679	79/13456	0.0452691365879357	0.170301743593623	0.130274296505343	15170/20190/72828/15945/18821/233979/12766/19229	8
GO:0006936	muscle contraction	15/679	184/13456	0.0457298292081718	0.171892801449709	0.131491394689584	21385/26556/17295/107589/19735/21916/18578/20190/19225/68667/18821/16518/233979/19204/21957	15
GO:0051091	positive regulation of DNA-binding transcription factor activity	16/679	200/13456	0.0461857849548356	0.173463443163706	0.132692875308838	71371/18755/12759/22339/21926/16193/16176/24088/70461/269209/107607/12985/73845/14362/257632/15364	16
GO:0050890	cognition	17/679	216/13456	0.0463830614142067	0.173951407636684	0.133066149399258	29813/13411/12227/15251/20620/50873/16176/26570/24088/15572/19225/21983/231380/13653/233489/211612/18733	17
GO:0050851	antigen receptor-mediated signaling pathway	11/679	123/13456	0.0463921372739311	0.173951407636684	0.133066149399258	15170/18755/20963/227059/19260/18578/21682/12927/16534/17060/319817	11
GO:1903792	negative regulation of anion transport	14/679	169/13456	0.0468533920739521	0.175536329811218	0.134278554022641	13121/58185/17869/50873/21926/54393/19735/16176/20912/18576/75767/384783/21825/12495	14
GO:0032970	regulation of actin filament-based process	23/679	314/13456	0.0469609429674586	0.175794582555816	0.134476107458754	15162/17295/69288/56193/14026/68732/50873/18186/24088/21916/18578/11856/260409/101497/12985/68667/18821/72754/16518/15901/19229/78321/99889	23
GO:0034329	cell junction assembly	20/679	265/13456	0.0473594192862355	0.177140572383684	0.135505738008794	18591/18755/20583/22339/21926/18186/19262/16176/24088/19277/11856/58235/12217/17920/21983/217692/14362/216856/19229/211323	20
GO:0032984	protein-containing complex disassembly	15/679	185/13456	0.0475582112320476	0.177738076788408	0.135962805942108	18008/74747/56193/14026/68732/17869/21926/21916/271221/66643/17755/101612/211323/70381/140810	15
GO:0019915	lipid storage	7/679	66/13456	0.047915644354017	0.178633917362396	0.136648089592731	19015/16956/11307/21926/16176/69863/69573	7
GO:0055006	cardiac cell development	7/679	66/13456	0.047915644354017	0.178633917362396	0.136648089592731	17295/22339/74116/18569/19735/18128/110196	7
GO:1903201	regulation of oxidative stress-induced cell death	7/679	66/13456	0.047915644354017	0.178633917362396	0.136648089592731	17295/15251/50873/21926/26570/15505/14362	7
GO:0000041	transition metal ion transport	8/679	80/13456	0.048179488077746	0.179031044677469	0.136951876744304	15216/227059/53945/68428/14725/58235/66532/214922	8
GO:0008585	female gonad development	8/679	80/13456	0.048179488077746	0.179031044677469	0.136951876744304	11622/71371/17311/380684/11504/22339/99929/16323	8
GO:0032963	collagen metabolic process	8/679	80/13456	0.048179488077746	0.179031044677469	0.136951876744304	18591/19015/15251/16193/20296/15901/17386/210719	8
GO:0051283	negative regulation of sequestering of calcium ion	8/679	80/13456	0.048179488077746	0.179031044677469	0.136951876744304	15170/20190/72828/15945/18821/233979/12766/19229	8
GO:0032273	positive regulation of protein polymerization	10/679	109/13456	0.0484245672028233	0.179687831735495	0.137454293631721	12576/17295/14026/68732/72948/260409/12985/17755/19229/99889	10
GO:0055001	muscle cell development	12/679	139/13456	0.0484351866299323	0.179687831735495	0.137454293631721	26556/17295/15205/22339/74116/19735/18128/21916/20190/110196/21957/78321	12
GO:0007272	ensheathment of neurons	11/679	124/13456	0.0487009887779456	0.180379903105947	0.137983701663692	19015/14245/72948/12759/21926/24088/14733/17196/225608/211323/387217	11
GO:0008366	axon ensheathment	11/679	124/13456	0.0487009887779456	0.180379903105947	0.137983701663692	19015/14245/72948/12759/21926/24088/14733/17196/225608/211323/387217	11
GO:0003012	muscle system process	20/679	266/13456	0.0489021633797864	0.18083074549536	0.138328578785184	21385/26556/17295/67731/107589/74116/19735/18128/21916/18578/20190/19225/68667/16468/18821/16518/233979/19204/110196/21957	20
GO:1904951	positive regulation of establishment of protein localization	20/679	266/13456	0.0489021633797864	0.18083074549536	0.138328578785184	19015/15251/50873/83433/11307/21926/16193/14725/19260/24088/19225/20296/68667/384783/77128/17386/216856/16534/18111/11727	20
GO:0032964	collagen biosynthetic process	5/679	40/13456	0.0493541451989708	0.18147016877683	0.138817713050077	18591/19015/16193/20296/210719	5
GO:0034205	amyloid-beta formation	5/679	40/13456	0.0493541451989708	0.18147016877683	0.138817713050077	12759/11307/21926/239606/233489	5
GO:0043029	T cell homeostasis	5/679	40/13456	0.0493541451989708	0.18147016877683	0.138817713050077	11622/12125/79201/53374/319817	5
GO:0045682	regulation of epidermis development	5/679	40/13456	0.0493541451989708	0.18147016877683	0.138817713050077	19015/18612/18755/15205/18128	5
GO:0046638	positive regulation of alpha-beta T cell differentiation	5/679	40/13456	0.0493541451989708	0.18147016877683	0.138817713050077	12522/20963/16193/16190/12772	5
GO:0048286	lung alveolus development	5/679	40/13456	0.0493541451989708	0.18147016877683	0.138817713050077	319939/22339/26570/12168/319817	5
GO:1900046	regulation of hemostasis	5/679	40/13456	0.0493541451989708	0.18147016877683	0.138817713050077	18591/18792/72828/21825/21824	5
GO:0001657	ureteric bud development	6/679	53/13456	0.0496311684104753	0.181608584087205	0.13892359544919	17869/15205/22339/12156/22420/381157	6
GO:0008347	glial cell migration	6/679	53/13456	0.0496311684104753	0.181608584087205	0.13892359544919	20302/83433/20293/20296/12772/321019	6
GO:0032233	positive regulation of actin filament bundle assembly	6/679	53/13456	0.0496311684104753	0.181608584087205	0.13892359544919	56193/14026/68732/18186/72754/15901	6
GO:0048002	antigen processing and presentation of peptide antigen	6/679	53/13456	0.0496311684104753	0.181608584087205	0.13892359544919	13034/15216/14991/83433/15001/15040	6
GO:0072163	mesonephric epithelium development	6/679	53/13456	0.0496311684104753	0.181608584087205	0.13892359544919	17869/15205/22339/12156/22420/381157	6
GO:0072164	mesonephric tubule development	6/679	53/13456	0.0496311684104753	0.181608584087205	0.13892359544919	17869/15205/22339/12156/22420/381157	6
GO:0001101	response to acid chemical	9/679	95/13456	0.0501156113941137	0.18221486520979	0.139387377234757	71962/50873/22339/21926/75747/16598/723827/68441/387174	9
GO:0006937	regulation of muscle contraction	9/679	95/13456	0.0501156113941137	0.18221486520979	0.139387377234757	19735/18578/20190/19225/68667/18821/16518/19204/21957	9
GO:0006858	extracellular transport	4/679	28/13456	0.0502772123689579	0.18221486520979	0.139387377234757	13411/269209/19726/320277	4
GO:0010830	regulation of myotube differentiation	4/679	28/13456	0.0502772123689579	0.18221486520979	0.139387377234757	17691/18128/79362/12180	4
GO:0010862	positive regulation of pathway-restricted SMAD protein phosphorylation	4/679	28/13456	0.0502772123689579	0.18221486520979	0.139387377234757	15216/12156/16323/12168	4
GO:0032369	negative regulation of lipid transport	4/679	28/13456	0.0502772123689579	0.18221486520979	0.139387377234757	21926/16176/384783/21825	4
GO:0044848	biological phase	4/679	28/13456	0.0502772123689579	0.18221486520979	0.139387377234757	19015/18128/19225/12571	4
GO:0045907	positive regulation of vasoconstriction	4/679	28/13456	0.0502772123689579	0.18221486520979	0.139387377234757	18591/19225/68667/19204	4
GO:0046329	negative regulation of JNK cascade	4/679	28/13456	0.0502772123689579	0.18221486520979	0.139387377234757	14013/19260/59036/330177	4
GO:0050999	regulation of nitric-oxide synthase activity	4/679	28/13456	0.0502772123689579	0.18221486520979	0.139387377234757	21926/16176/107607/19229	4
GO:0071827	plasma lipoprotein particle organization	4/679	28/13456	0.0502772123689579	0.18221486520979	0.139387377234757	11303/16956/11307/26970	4
GO:0090075	relaxation of muscle	4/679	28/13456	0.0502772123689579	0.18221486520979	0.139387377234757	19735/18578/18821/16518	4
GO:0008645	hexose transmembrane transport	8/679	81/13456	0.0512089184767463	0.182414360905785	0.139539983784187	117591/17295/22612/17869/21926/16176/20912/384783	8
GO:0014812	muscle cell migration	8/679	81/13456	0.0512089184767463	0.182414360905785	0.139539983784187	18591/19015/17295/67220/18792/17869/11504/13653	8
GO:0030048	actin filament-based movement	8/679	81/13456	0.0512089184767463	0.182414360905785	0.139539983784187	14026/18578/11787/17921/17920/68667/18821/16518	8
GO:0045446	endothelial cell differentiation	8/679	81/13456	0.0512089184767463	0.182414360905785	0.139539983784187	17295/22339/21926/18128/16176/12226/15901/12168	8
GO:1904659	glucose transmembrane transport	8/679	81/13456	0.0512089184767463	0.182414360905785	0.139539983784187	117591/17295/22612/17869/21926/16176/20912/384783	8
GO:0051341	regulation of oxidoreductase activity	7/679	67/13456	0.0512851427872625	0.182414360905785	0.139539983784187	50873/21926/16176/107607/12856/257632/19229	7
GO:1904029	regulation of cyclin-dependent protein kinase activity	7/679	67/13456	0.0512851427872625	0.182414360905785	0.139539983784187	18591/12576/83383/23834/12452/218630/12443	7
GO:0006595	polyamine metabolic process	3/679	17/13456	0.0512940206413457	0.182414360905785	0.139539983784187	20810/18263/330817	3
GO:0006691	leukotriene metabolic process	3/679	17/13456	0.0512940206413457	0.182414360905785	0.139539983784187	20963/24088/319446	3
GO:0030810	positive regulation of nucleotide biosynthetic process	3/679	17/13456	0.0512940206413457	0.182414360905785	0.139539983784187	17869/50873/83433	3
GO:0034138	toll-like receptor 3 signaling pathway	3/679	17/13456	0.0512940206413457	0.182414360905785	0.139539983784187	171285/21926/19260	3
GO:0034368	protein-lipid complex remodeling	3/679	17/13456	0.0512940206413457	0.182414360905785	0.139539983784187	16956/11307/26970	3
GO:0034369	plasma lipoprotein particle remodeling	3/679	17/13456	0.0512940206413457	0.182414360905785	0.139539983784187	16956/11307/26970	3
GO:0034505	tooth mineralization	3/679	17/13456	0.0512940206413457	0.182414360905785	0.139539983784187	80752/58235/22420	3
GO:0035115	embryonic forelimb morphogenesis	3/679	17/13456	0.0512940206413457	0.182414360905785	0.139539983784187	14013/244585/12393	3
GO:0043011	myeloid dendritic cell differentiation	3/679	17/13456	0.0512940206413457	0.182414360905785	0.139539983784187	16364/381319/18733	3
GO:0045606	positive regulation of epidermal cell differentiation	3/679	17/13456	0.0512940206413457	0.182414360905785	0.139539983784187	18612/18755/18128	3
GO:0045624	positive regulation of T-helper cell differentiation	3/679	17/13456	0.0512940206413457	0.182414360905785	0.139539983784187	16193/16190/12772	3
GO:0045761	regulation of adenylate cyclase activity	3/679	17/13456	0.0512940206413457	0.182414360905785	0.139539983784187	54393/74191/110789	3
GO:0048265	response to pain	3/679	17/13456	0.0512940206413457	0.182414360905785	0.139539983784187	21825/246228/18413	3
GO:0048841	regulation of axon extension involved in axon guidance	3/679	17/13456	0.0512940206413457	0.182414360905785	0.139539983784187	22339/18186/12168	3
GO:0051000	positive regulation of nitric-oxide synthase activity	3/679	17/13456	0.0512940206413457	0.182414360905785	0.139539983784187	21926/107607/19229	3
GO:1900373	positive regulation of purine nucleotide biosynthetic process	3/679	17/13456	0.0512940206413457	0.182414360905785	0.139539983784187	17869/50873/83433	3
GO:2000310	regulation of NMDA receptor activity	3/679	17/13456	0.0512940206413457	0.182414360905785	0.139539983784187	19739/20296/19229	3
GO:0050804	modulation of chemical synaptic transmission	25/679	351/13456	0.0520930024500766	0.185111121899101	0.141602902423973	26556/17295/19157/109934/20620/50873/21926/54393/19262/16176/26570/15572/19225/17920/20296/227120/13653/217692/12772/216856/18733/19229/723827/387217/387174	25
GO:0032147	activation of protein kinase activity	14/679	172/13456	0.0528766048236248	0.187749067985289	0.143620829917523	18591/17295/17873/20963/16012/22339/21926/12156/16176/21825/19229/330177/211323/11727	14
GO:0099177	regulation of trans-synaptic signaling	25/679	352/13456	0.0535241599651969	0.189294543993452	0.144803059737846	26556/17295/19157/109934/20620/50873/21926/54393/19262/16176/26570/15572/19225/17920/20296/227120/13653/217692/12772/216856/18733/19229/723827/387217/387174	25
GO:0001823	mesonephros development	6/679	54/13456	0.0535613736079891	0.189294543993452	0.144803059737846	17869/15205/22339/12156/22420/381157	6
GO:0030888	regulation of B cell proliferation	6/679	54/13456	0.0535613736079891	0.189294543993452	0.144803059737846	11622/12053/227059/12142/384783/321019	6
GO:0042130	negative regulation of T cell proliferation	6/679	54/13456	0.0535613736079891	0.189294543993452	0.144803059737846	15170/14991/171285/213208/245126/12519	6
GO:0051279	regulation of release of sequestered calcium ion into cytosol	6/679	54/13456	0.0535613736079891	0.189294543993452	0.144803059737846	15170/72828/15945/18821/12766/19229	6
GO:0051952	regulation of amine transport	6/679	54/13456	0.0535613736079891	0.189294543993452	0.144803059737846	21926/54393/19735/16176/12495/269642	6
GO:0015718	monocarboxylic acid transport	10/679	111/13456	0.0536180304753129	0.189347769374418	0.144843775111131	20493/20963/17869/21926/54393/16176/26570/74152/26970/17920	10
GO:0010712	regulation of collagen metabolic process	5/679	41/13456	0.0539756225433334	0.189874060136981	0.145246367341859	18591/19015/16193/20296/210719	5
GO:0010812	negative regulation of cell-substrate adhesion	5/679	41/13456	0.0539756225433334	0.189874060136981	0.145246367341859	12053/18128/11856/12927/21825	5
GO:0045740	positive regulation of DNA replication	5/679	41/13456	0.0539756225433334	0.189874060136981	0.145246367341859	18591/17295/16193/29815/268936	5
GO:0051926	negative regulation of calcium ion transport	5/679	41/13456	0.0539756225433334	0.189874060136981	0.145246367341859	11622/15205/19225/100503659/18821	5
GO:0099601	regulation of neurotransmitter receptor activity	5/679	41/13456	0.0539756225433334	0.189874060136981	0.145246367341859	26556/19739/20296/216856/19229	5
GO:0050772	positive regulation of axonogenesis	8/679	82/13456	0.0543585588777579	0.190778843493873	0.145938491878118	14025/22339/18186/140571/233489/17755/211323/12168	8
GO:0051282	regulation of sequestering of calcium ion	8/679	82/13456	0.0543585588777579	0.190778843493873	0.145938491878118	15170/20190/72828/15945/18821/233979/12766/19229	8
GO:1902882	regulation of response to oxidative stress	8/679	82/13456	0.0543585588777579	0.190778843493873	0.145938491878118	17295/15251/50873/21926/26570/15505/75747/14362	8
GO:1901653	cellular response to peptide	18/679	237/13456	0.0549262071041267	0.192622569135581	0.147348871219245	16956/14245/15370/83433/64898/19262/16176/19260/29815/18576/12927/75747/235442/107607/384783/12702/257632/12096	18
GO:0016064	immunoglobulin mediated immune response	9/679	97/13456	0.0558798563786059	0.195184352013292	0.149308536781975	15170/12053/21926/54123/22256/16190/12051/257632/15040	9
GO:0043280	positive regulation of cysteine-type endopeptidase activity involved in apoptotic process	9/679	97/13456	0.0558798563786059	0.195184352013292	0.149308536781975	12122/83383/20963/17869/21926/12125/79201/107607/215114	9
GO:0055076	transition metal ion homeostasis	9/679	97/13456	0.0558798563786059	0.195184352013292	0.149308536781975	15216/15251/17869/13819/227059/53945/68428/14725/233489	9
GO:0017158	regulation of calcium ion-dependent exocytosis	4/679	29/13456	0.0560854860354539	0.195184352013292	0.149308536781975	18128/20912/100503659/27062	4
GO:0030808	regulation of nucleotide biosynthetic process	4/679	29/13456	0.0560854860354539	0.195184352013292	0.149308536781975	17869/50873/83433/12495	4
GO:0045923	positive regulation of fatty acid metabolic process	4/679	29/13456	0.0560854860354539	0.195184352013292	0.149308536781975	19015/16176/19225/384783	4
GO:0048713	regulation of oligodendrocyte differentiation	4/679	29/13456	0.0560854860354539	0.195184352013292	0.149308536781975	15205/18128/19262/24088	4
GO:0099172	presynapse organization	4/679	29/13456	0.0560854860354539	0.195184352013292	0.149308536781975	12217/233489/14362/216856	4
GO:1900371	regulation of purine nucleotide biosynthetic process	4/679	29/13456	0.0560854860354539	0.195184352013292	0.149308536781975	17869/50873/83433/12495	4
GO:2000516	positive regulation of CD4-positive	alpha-beta T cell activation	4/679	29/13456	0.0560854860354539	0.195184352013292	0.149308536781975	12522/16193/16190/12772	4
GO:0031331	positive regulation of cellular catabolic process	24/679	337/13456	0.0562059981920998	0.195454319152359	0.149515051280179	12122/12227/15251/20620/12759/17869/50873/21425/83433/21926/16193/12125/16176/24088/22241/75747/22057/107607/384783/59036/257632/19229/231002/15511	24
GO:0032868	response to insulin	15/679	190/13456	0.0574716096128885	0.19964802205049	0.152723073014296	16956/14245/64898/19262/16176/20912/29815/18576/12927/75747/235442/13653/384783/12702/12096	15
GO:0015749	monosaccharide transmembrane transport	8/679	83/13456	0.057629393158354	0.19964802205049	0.152723073014296	117591/17295/22612/17869/21926/16176/20912/384783	8
GO:0061041	regulation of wound healing	8/679	83/13456	0.057629393158354	0.19964802205049	0.152723073014296	18591/18792/107589/21926/72828/20296/21825/21824	8
GO:0006720	isoprenoid metabolic process	6/679	55/13456	0.0576751206055348	0.19964802205049	0.152723073014296	19015/77974/19682/110196/20148/208715	6
GO:0034394	protein localization to cell surface	6/679	55/13456	0.0576751206055348	0.19964802205049	0.152723073014296	15216/21926/269346/233489/68891/211323	6
GO:0050709	negative regulation of protein secretion	6/679	55/13456	0.0576751206055348	0.19964802205049	0.152723073014296	13121/58185/50873/16176/18576/75767	6
GO:0034250	positive regulation of cellular amide metabolic process	12/679	143/13456	0.0577701129078203	0.199824889024619	0.152858369460142	12759/11307/21926/16193/98956/239606/233489/21825/12051/257632/19204/19229	12
GO:1901655	cellular response to ketone	7/679	69/13456	0.0584621514102987	0.201213414535818	0.153920538175119	83383/11622/74747/67731/20750/224829/723827	7
GO:0006066	alcohol metabolic process	18/679	239/13456	0.0586403258601899	0.201213414535818	0.153920538175119	13121/18106/11303/56193/77974/11307/14933/12156/66234/69863/13849/242864/19204/19229/110196/20148/53881/208715	18
GO:0031348	negative regulation of defense response	13/679	159/13456	0.0588326438706491	0.201213414535818	0.153920538175119	19015/14991/109934/171285/57781/19883/23959/213208/13024/268857/12702/257632/15040	13
GO:0007405	neuroblast proliferation	5/679	42/13456	0.0588394235660399	0.201213414535818	0.153920538175119	15251/22339/18128/242620/68519	5
GO:0009161	ribonucleoside monophosphate metabolic process	5/679	42/13456	0.0588394235660399	0.201213414535818	0.153920538175119	14450/110639/80914/23959/99586	5
GO:0034198	cellular response to amino acid starvation	5/679	42/13456	0.0588394235660399	0.201213414535818	0.153920538175119	21425/11910/22241/75747/68441	5
GO:0043030	regulation of macrophage activation	5/679	42/13456	0.0588394235660399	0.201213414535818	0.153920538175119	171285/83433/16190/19883/21825	5
GO:0045620	negative regulation of lymphocyte differentiation	5/679	42/13456	0.0588394235660399	0.201213414535818	0.153920538175119	16950/12053/16190/319817/67122	5
GO:0050818	regulation of coagulation	5/679	42/13456	0.0588394235660399	0.201213414535818	0.153920538175119	18591/18792/72828/21825/21824	5
GO:2000179	positive regulation of neural precursor cell proliferation	5/679	42/13456	0.0588394235660399	0.201213414535818	0.153920538175119	15251/22339/18128/14725/242620	5
GO:0046661	male sex differentiation	9/679	98/13456	0.058916548953716	0.201213414535818	0.153920538175119	12124/71371/14725/12125/17684/16323/381157/15364/12443	9
GO:0007409	axonogenesis	23/679	322/13456	0.0590191968028657	0.201213414535818	0.153920538175119	14025/29869/18612/380684/14026/22339/11302/18186/18187/16782/18128/14725/11787/22241/19277/140571/171207/58235/233489/217692/17755/211323/12168	23
GO:0002089	lens morphogenesis in camera-type eye	3/679	18/13456	0.0593208265173699	0.201213414535818	0.153920538175119	29815/58235/17684	3
GO:0002363	alpha-beta T cell lineage commitment	3/679	18/13456	0.0593208265173699	0.201213414535818	0.153920538175119	16950/16364/16193	3
GO:0002495	antigen processing and presentation of peptide antigen via MHC class II	3/679	18/13456	0.0593208265173699	0.201213414535818	0.153920538175119	13034/83433/15001	3
GO:0003171	atrioventricular valve development	3/679	18/13456	0.0593208265173699	0.201213414535818	0.153920538175119	18128/12156/12168	3
GO:0010743	regulation of macrophage derived foam cell differentiation	3/679	18/13456	0.0593208265173699	0.201213414535818	0.153920538175119	16956/18755/11307	3
GO:0014047	glutamate secretion	3/679	18/13456	0.0593208265173699	0.201213414535818	0.153920538175119	54393/16176/17920	3
GO:0031342	negative regulation of cell killing	3/679	18/13456	0.0593208265173699	0.201213414535818	0.153920538175119	14991/171285/15040	3
GO:0034114	regulation of heterotypic cell-cell adhesion	3/679	18/13456	0.0593208265173699	0.201213414535818	0.153920538175119	21926/16176/17196	3
GO:0036314	response to sterol	3/679	18/13456	0.0593208265173699	0.201213414535818	0.153920538175119	19883/235283/16323	3
GO:0043171	peptide catabolic process	3/679	18/13456	0.0593208265173699	0.201213414535818	0.153920538175119	19155/279028/17386	3
GO:0048820	hair follicle maturation	3/679	18/13456	0.0593208265173699	0.201213414535818	0.153920538175119	19015/18128/19225	3
GO:0120178	steroid hormone biosynthetic process	3/679	18/13456	0.0593208265173699	0.201213414535818	0.153920538175119	78925/12156/13653	3
GO:1900274	regulation of phospholipase C activity	3/679	18/13456	0.0593208265173699	0.201213414535818	0.153920538175119	11856/19204/11727	3
GO:1903975	regulation of glial cell migration	3/679	18/13456	0.0593208265173699	0.201213414535818	0.153920538175119	83433/12772/321019	3
GO:0007389	pattern specification process	21/679	289/13456	0.0596744127414198	0.202262045270993	0.15472270043392	21385/13411/12227/15251/15205/18186/18187/18128/14725/12156/79362/22420/244585/231214/17684/19726/235542/242620/12168/16658/67122	21
GO:0008584	male gonad development	8/679	84/13456	0.0610222560101202	0.206216265299233	0.157747526965559	12124/71371/14725/12125/17684/16323/15364/12443	8
GO:0034219	carbohydrate transmembrane transport	8/679	84/13456	0.0610222560101202	0.206216265299233	0.157747526965559	117591/17295/22612/17869/21926/16176/20912/384783	8
GO:0045639	positive regulation of myeloid cell differentiation	8/679	84/13456	0.0610222560101202	0.206216265299233	0.157747526965559	20302/17311/15251/14281/83433/21926/12985/16323	8
GO:0051208	sequestering of calcium ion	8/679	84/13456	0.0610222560101202	0.206216265299233	0.157747526965559	15170/20190/72828/15945/18821/233979/12766/19229	8
GO:0045786	negative regulation of cell cycle	27/679	391/13456	0.0611156004940066	0.206378496623678	0.157871627701213	12576/83383/14991/23834/15468/12227/20620/17869/15370/20112/21926/18128/12156/140917/11787/28019/75430/19225/20293/12226/21825/12571/16323/59036/18413/330177/12443	27
GO:0045861	negative regulation of proteolysis	16/679	208/13456	0.0616091137749575	0.207510583890394	0.158737631003011	14038/15216/15370/22339/74116/21926/16193/209378/20713/19225/233489/21825/223701/13024/78709/15511	16
GO:0006469	negative regulation of protein kinase activity	14/679	176/13456	0.0617074653859075	0.207510583890394	0.158737631003011	12576/15170/83383/17873/16193/19735/16176/19260/19277/75590/319520/72828/240672/235584	14
GO:0050803	regulation of synapse structure or activity	14/679	176/13456	0.0617074653859075	0.207510583890394	0.158737631003011	26556/16560/21926/18187/26570/24088/19277/58235/21983/233489/217692/14362/216856/239027	14
GO:0016055	Wnt signaling pathway	22/679	307/13456	0.0619690755696391	0.207510583890394	0.158737631003011	17869/20583/50873/18128/12156/24088/56811/19277/22420/17342/68667/13653/235542/59036/14362/15364/723827/12443/20668/67122/629378/387174	22
GO:0019935	cyclic-nucleotide-mediated signaling	6/679	56/13456	0.0619729900901433	0.207510583890394	0.158737631003011	11622/19735/70461/18576/21825/19229	6
GO:0030330	DNA damage response	signal transduction by p53 class mediator	6/679	56/13456	0.0619729900901433	0.207510583890394	0.158737631003011	29813/83383/20583/28019/17920/12051	6
GO:0050810	regulation of steroid biosynthetic process	6/679	56/13456	0.0619729900901433	0.207510583890394	0.158737631003011	20583/11307/21926/12156/13653/110196	6
GO:0007569	cell aging	9/679	99/13456	0.0620573188864354	0.207510583890394	0.158737631003011	21385/14991/20620/12053/18569/12571/15364/387217/387174	9
GO:0060759	regulation of response to cytokine stimulus	9/679	99/13456	0.0620573188864354	0.207510583890394	0.158737631003011	15251/20963/50873/83433/54123/16193/16177/24088/77128	9
GO:0001755	neural crest cell migration	4/679	30/13456	0.0622382610641263	0.207510583890394	0.158737631003011	17311/15251/18186/18187	4
GO:0002455	humoral immune response mediated by circulating immunoglobulin	4/679	30/13456	0.0622382610641263	0.207510583890394	0.158737631003011	15170/21926/12051/257632	4
GO:0030501	positive regulation of bone mineralization	4/679	30/13456	0.0622382610641263	0.207510583890394	0.158737631003011	80752/12156/12168/110789	4
GO:0032607	interferon-alpha production	4/679	30/13456	0.0622382610641263	0.207510583890394	0.158737631003011	171285/54123/19260/268857	4
GO:0035774	positive regulation of insulin secretion involved in cellular response to glucose stimulus	4/679	30/13456	0.0622382610641263	0.207510583890394	0.158737631003011	19015/15251/50873/68667	4
GO:0043243	positive regulation of protein-containing complex disassembly	4/679	30/13456	0.0622382610641263	0.207510583890394	0.158737631003011	18008/56193/68732/21926	4
GO:1904037	positive regulation of epithelial cell apoptotic process	4/679	30/13456	0.0622382610641263	0.207510583890394	0.158737631003011	14991/18569/20293/21825	4
GO:0042476	odontogenesis	7/679	70/13456	0.0622714098405706	0.207510583890394	0.158737631003011	80752/12156/12125/58235/22420/12393/16323	7
GO:2000177	regulation of neural precursor cell proliferation	7/679	70/13456	0.0622714098405706	0.207510583890394	0.158737631003011	12227/15251/22339/18128/14725/16176/242620	7
GO:0031346	positive regulation of cell projection organization	23/679	324/13456	0.0623473263025767	0.207611579611799	0.158814888852981	14025/17295/68732/11504/22339/16193/18186/19735/20713/15572/140571/353047/260409/235442/233489/13803/14362/17755/53860/19229/211323/12168/140810	23
GO:0034248	regulation of cellular amide metabolic process	25/679	358/13456	0.0627085454702074	0.208661768260515	0.159618242855837	29813/53422/12227/12759/11307/21926/16193/19735/98956/26570/15572/319765/239606/22057/242248/233489/21825/13803/12051/257632/19204/19229/11727/231002/116905	25
GO:0002429	immune response-activating cell surface receptor signaling pathway	12/679	145/13456	0.0628601393497009	0.209013407099955	0.159887233069709	15170/18755/20963/227059/19260/24088/18578/21682/12927/16534/17060/319817	12
GO:0031589	cell-substrate adhesion	19/679	258/13456	0.063597477603921	0.211310743104415	0.161644606925679	18591/19015/12032/68732/18792/12053/22339/18186/18128/19262/12125/20750/11856/12927/13612/20130/21825/12571/19229	19
GO:0198738	cell-cell signaling by wnt	22/679	308/13456	0.0637227165290569	0.211385664052747	0.161701918575175	17869/20583/50873/18128/12156/24088/56811/19277/22420/17342/68667/13653/235542/59036/14362/15364/723827/12443/20668/67122/629378/387174	22
GO:0060070	canonical Wnt signaling pathway	16/679	209/13456	0.0637572916517506	0.211385664052747	0.161701918575175	17869/20583/50873/18128/56811/19277/22420/17342/68667/13653/235542/59036/14362/20668/67122/629378	16
GO:0045912	negative regulation of carbohydrate metabolic process	5/679	43/13456	0.0639450921354641	0.211385664052747	0.161701918575175	74747/56193/50873/17691/16193	5
GO:0048538	thymus development	5/679	43/13456	0.0639450921354641	0.211385664052747	0.161701918575175	15205/12125/16468/17684/16658	5
GO:0050994	regulation of lipid catabolic process	5/679	43/13456	0.0639450921354641	0.211385664052747	0.161701918575175	21926/16176/70461/18576/384783	5
GO:0090311	regulation of protein deacetylation	5/679	43/13456	0.0639450921354641	0.211385664052747	0.161701918575175	14245/72948/12053/22339/81703	5
GO:0090342	regulation of cell aging	5/679	43/13456	0.0639450921354641	0.211385664052747	0.161701918575175	14991/20620/12053/12571/15364	5
GO:0010950	positive regulation of endopeptidase activity	11/679	130/13456	0.0641911300315021	0.21161463582086	0.161877073188282	12122/83383/20963/17869/21926/12125/79201/107607/233489/215114/17196	11
GO:0035148	tube formation	11/679	130/13456	0.0641911300315021	0.21161463582086	0.161877073188282	15251/22339/18128/14725/12125/19143/22420/21817/231214/17684/14362	11
GO:0051017	actin filament bundle assembly	11/679	130/13456	0.0641911300315021	0.21161463582086	0.161877073188282	17295/56193/14026/68732/50873/18186/11856/72754/15901/19229/17118	11
GO:0009896	positive regulation of catabolic process	27/679	393/13456	0.0642003102083936	0.21161463582086	0.161877073188282	12122/12227/15251/20620/12759/17869/50873/21425/83433/21926/16193/12125/16176/24088/22241/75747/99929/22057/107607/384783/235542/59036/77128/257632/19229/231002/15511	27
GO:0046546	development of primary male sexual characteristics	8/679	85/13456	0.0645378313844669	0.212573233330024	0.162610363485274	12124/71371/14725/12125/17684/16323/15364/12443	8
GO:0032368	regulation of lipid transport	10/679	115/13456	0.0650778527005276	0.214196952633985	0.16385244642337	11303/20963/11307/21926/54393/16176/20750/69863/384783/21825	10
GO:0002824	positive regulation of adaptive immune response based on somatic recombination of immune receptors built from immunoglobulin superfamily domains	9/679	100/13456	0.0653028063869225	0.214782062625196	0.16430003310613	14991/58185/21926/16193/16177/16176/12772/257632/15040	9
GO:0002757	immune response-activating signal transduction	12/679	146/13456	0.0655127743505661	0.215317074977456	0.164709297018182	15170/18755/20963/227059/19260/24088/18578/21682/12927/16534/17060/319817	12
GO:0032869	cellular response to insulin stimulus	13/679	162/13456	0.0662278918475322	0.217160141004664	0.166119171779537	16956/14245/64898/19262/16176/29815/18576/12927/75747/235442/384783/12702/12096	13
GO:1902905	positive regulation of supramolecular fiber organization	13/679	162/13456	0.0662278918475322	0.217160141004664	0.166119171779537	12576/17295/56193/14026/68732/18186/260409/12985/72754/15901/17755/19229/99889	13
GO:0002312	B cell activation involved in immune response	7/679	71/13456	0.0662286270565206	0.217160141004664	0.166119171779537	17079/12053/16193/22256/321019/12051/19229	7
GO:0007589	body fluid secretion	6/679	57/13456	0.0664552013223852	0.217160141004664	0.166119171779537	15251/22339/279561/17386/16534/12443	6
GO:0015837	amine transport	6/679	57/13456	0.0664552013223852	0.217160141004664	0.166119171779537	21926/54393/19735/16176/12495/269642	6
GO:0015914	phospholipid transport	6/679	57/13456	0.0664552013223852	0.217160141004664	0.166119171779537	11303/11307/11981/235527/71795/16534	6
GO:0048708	astrocyte differentiation	6/679	57/13456	0.0664552013223852	0.217160141004664	0.166119171779537	15205/83433/18128/12156/16176/15364	6
GO:0090398	cellular senescence	6/679	57/13456	0.0664552013223852	0.217160141004664	0.166119171779537	21385/14991/20620/12053/12571/15364	6
GO:0002438	acute inflammatory response to antigenic stimulus	3/679	19/13456	0.0678967201521033	0.21997570827927	0.168272972663913	12511/213208/15040	3
GO:0008207	C21-steroid hormone metabolic process	3/679	19/13456	0.0678967201521033	0.21997570827927	0.168272972663913	78925/12156/13653	3
GO:0032703	negative regulation of interleukin-2 production	3/679	19/13456	0.0678967201521033	0.21997570827927	0.168272972663913	171285/213208/257632	3
GO:0034367	protein-containing complex remodeling	3/679	19/13456	0.0678967201521033	0.21997570827927	0.168272972663913	16956/11307/26970	3
GO:0043369	CD4-positive or CD8-positive	alpha-beta T cell lineage commitment	3/679	19/13456	0.0678967201521033	0.21997570827927	0.168272972663913	16950/16364/16193	3
GO:0050857	positive regulation of antigen receptor-mediated signaling pathway	3/679	19/13456	0.0678967201521033	0.21997570827927	0.168272972663913	18755/227059/16534	3
GO:0051770	positive regulation of nitric-oxide synthase biosynthetic process	3/679	19/13456	0.0678967201521033	0.21997570827927	0.168272972663913	24088/20296/257632	3
GO:0060563	neuroepithelial cell differentiation	3/679	19/13456	0.0678967201521033	0.21997570827927	0.168272972663913	15205/80752/12156	3
GO:0090025	regulation of monocyte chemotaxis	3/679	19/13456	0.0678967201521033	0.21997570827927	0.168272972663913	15945/20296/12772	3
GO:0140058	neuron projection arborization	3/679	19/13456	0.0678967201521033	0.21997570827927	0.168272972663913	18186/14725/21983	3
GO:0150146	cell junction disassembly	3/679	19/13456	0.0678967201521033	0.21997570827927	0.168272972663913	20583/83433/212307	3
GO:2000810	regulation of bicellular tight junction assembly	3/679	19/13456	0.0678967201521033	0.21997570827927	0.168272972663913	18755/20583/21926	3
GO:0009743	response to carbohydrate	12/679	147/13456	0.0682377878965645	0.220481598811492	0.16865995950153	19015/15251/20112/50873/16176/18576/68667/13653/384783/21825/18111/667118	12
GO:0001523	retinoid metabolic process	4/679	31/13456	0.0687309729159727	0.220481598811492	0.16865995950153	19015/77974/19682/20148	4
GO:0001569	branching involved in blood vessel morphogenesis	4/679	31/13456	0.0687309729159727	0.220481598811492	0.16865995950153	11622/22339/18186/67122	4
GO:0009620	response to fungus	4/679	31/13456	0.0687309729159727	0.220481598811492	0.16865995950153	20963/56620/24088/11727	4
GO:0010463	mesenchymal cell proliferation	4/679	31/13456	0.0687309729159727	0.220481598811492	0.16865995950153	17869/22339/12156/384783	4
GO:0019884	antigen processing and presentation of exogenous antigen	4/679	31/13456	0.0687309729159727	0.220481598811492	0.16865995950153	13034/14991/15001/15040	4
GO:0021879	forebrain neuron differentiation	4/679	31/13456	0.0687309729159727	0.220481598811492	0.16865995950153	15205/18186/18187/16323	4
GO:0042491	inner ear auditory receptor cell differentiation	4/679	31/13456	0.0687309729159727	0.220481598811492	0.16865995950153	15205/18128/17921/17920	4
GO:0050432	catecholamine secretion	4/679	31/13456	0.0687309729159727	0.220481598811492	0.16865995950153	17069/54393/12495/27062	4
GO:0060986	endocrine hormone secretion	4/679	31/13456	0.0687309729159727	0.220481598811492	0.16865995950153	16176/75767/235442/16323	4
GO:0070229	negative regulation of lymphocyte apoptotic process	4/679	31/13456	0.0687309729159727	0.220481598811492	0.16865995950153	15251/227059/384783/76088	4
GO:0070884	regulation of calcineurin-NFAT signaling cascade	4/679	31/13456	0.0687309729159727	0.220481598811492	0.16865995950153	54446/21926/211323/100504518	4
GO:0071384	cellular response to corticosteroid stimulus	4/679	31/13456	0.0687309729159727	0.220481598811492	0.16865995950153	83383/74747/67731/77128	4
GO:0071825	protein-lipid complex subunit organization	4/679	31/13456	0.0687309729159727	0.220481598811492	0.16865995950153	11303/16956/11307/26970	4
GO:0009988	cell-cell recognition	5/679	44/13456	0.0692915467077668	0.221967009580404	0.16979624171954	171285/12511/13524/76088/15511	5
GO:0016126	sterol biosynthetic process	5/679	44/13456	0.0692915467077668	0.221967009580404	0.16979624171954	13121/11307/66234/110196/208715	5
GO:0014074	response to purine-containing compound	7/679	72/13456	0.0703341128472881	0.225148299353626	0.17222980627643	11622/16176/20190/68667/12916/208715/442846	7
GO:0044283	small molecule biosynthetic process	30/679	449/13456	0.0710054429368186	0.226712603426598	0.173426438843582	13121/18106/67873/16956/56193/15251/20963/20583/11307/17691/21926/16193/266645/11910/12156/16176/20750/66234/23959/19225/99586/13653/13849/12495/104263/19204/19229/110196/66902/208715	30
GO:0006690	icosanoid metabolic process	6/679	58/13456	0.0711216163649346	0.226712603426598	0.173426438843582	20963/16176/24088/19225/13849/319446	6
GO:0010611	regulation of cardiac muscle hypertrophy	6/679	58/13456	0.0711216163649346	0.226712603426598	0.173426438843582	67731/74116/19735/18128/16468/110196	6
GO:0014743	regulation of muscle hypertrophy	6/679	58/13456	0.0711216163649346	0.226712603426598	0.173426438843582	67731/74116/19735/18128/16468/110196	6
GO:0018958	phenol-containing compound metabolic process	6/679	58/13456	0.0711216163649346	0.226712603426598	0.173426438843582	72472/17069/50873/13819/26570/16522	6
GO:0045913	positive regulation of carbohydrate metabolic process	6/679	58/13456	0.0711216163649346	0.226712603426598	0.173426438843582	18591/18106/15251/17869/384783/19204	6
GO:0031644	regulation of nervous system process	10/679	117/13456	0.071354554451592	0.227295963515498	0.173872686918247	26556/14245/72948/50873/21926/16193/216856/19204/19229/211323	10
GO:0007368	determination of left/right symmetry	8/679	87/13456	0.0719390953504452	0.22899773568897	0.175174477305317	21385/13411/15251/18128/244585/231214/17684/19726	8
GO:0061572	actin filament bundle organization	11/679	133/13456	0.073017286620995	0.232267427462452	0.177675665998934	17295/56193/14026/68732/50873/18186/11856/72754/15901/19229/17118	11
GO:0030216	keratinocyte differentiation	7/679	73/13456	0.0745879520614574	0.236904749437499	0.181223039297763	18612/18755/18128/14284/19143/19225/56338	7
GO:0071230	cellular response to amino acid stimulus	7/679	73/13456	0.0745879520614574	0.236904749437499	0.181223039297763	71962/50873/21926/75747/723827/68441/387174	7
GO:0051701	biological process involved in interaction with host	10/679	118/13456	0.0746312413649765	0.236904749437499	0.181223039297763	29869/17869/17069/18186/20612/12125/22241/58235/233979/68441	10
GO:0002027	regulation of heart rate	5/679	45/13456	0.0748771008515328	0.237024035518899	0.18131428857102	13819/21926/68667/17201/16518	5
GO:0045646	regulation of erythrocyte differentiation	5/679	45/13456	0.0748771008515328	0.237024035518899	0.18131428857102	15251/16909/12571/16323/16658	5
GO:0051785	positive regulation of nuclear division	5/679	45/13456	0.0748771008515328	0.237024035518899	0.18131428857102	18591/17295/21926/16176/243866	5
GO:0060191	regulation of lipase activity	5/679	45/13456	0.0748771008515328	0.237024035518899	0.18131428857102	57875/19735/11856/19204/11727	5
GO:0001937	negative regulation of endothelial cell proliferation	4/679	32/13456	0.0755579065670563	0.237679302866398	0.181815542938222	21926/20293/21825/12766	4
GO:0007520	myoblast fusion	4/679	32/13456	0.0755579065670563	0.237679302866398	0.181815542938222	13549/67220/16190/15945	4
GO:0010517	regulation of phospholipase activity	4/679	32/13456	0.0755579065670563	0.237679302866398	0.181815542938222	19735/11856/19204/11727	4
GO:0030514	negative regulation of BMP signaling pathway	4/679	32/13456	0.0755579065670563	0.237679302866398	0.181815542938222	18128/14725/22057/14362	4
GO:0045332	phospholipid translocation	4/679	32/13456	0.0755579065670563	0.237679302866398	0.181815542938222	11303/11981/235527/16534	4
GO:0061098	positive regulation of protein tyrosine kinase activity	4/679	32/13456	0.0755579065670563	0.237679302866398	0.181815542938222	18591/11839/15505/232801	4
GO:0106056	regulation of calcineurin-mediated signaling	4/679	32/13456	0.0755579065670563	0.237679302866398	0.181815542938222	54446/21926/211323/100504518	4
GO:0140354	lipid import into cell	4/679	32/13456	0.0755579065670563	0.237679302866398	0.181815542938222	21926/26570/384783/21825	4
GO:2000404	regulation of T cell migration	4/679	32/13456	0.0755579065670563	0.237679302866398	0.181815542938222	57781/15945/12772/76088	4
GO:2000278	regulation of DNA biosynthetic process	9/679	103/13456	0.075672354483901	0.237679302866398	0.181815542938222	18591/11622/17869/22339/21926/98956/13134/19229/12168	9
GO:0021782	glial cell development	8/679	88/13456	0.0758253898671231	0.237679302866398	0.181815542938222	18591/72948/12759/83433/16176/24088/225608/211323	8
GO:0030326	embryonic limb morphogenesis	8/679	88/13456	0.0758253898671231	0.237679302866398	0.181815542938222	21385/18128/12125/14013/244585/12393/73692/140810	8
GO:0035113	embryonic appendage morphogenesis	8/679	88/13456	0.0758253898671231	0.237679302866398	0.181815542938222	21385/18128/12125/14013/244585/12393/73692/140810	8
GO:2001243	negative regulation of intrinsic apoptotic signaling pathway	8/679	88/13456	0.0758253898671231	0.237679302866398	0.181815542938222	29813/12122/15251/12759/20583/50873/15505/19225	8
GO:0006919	activation of cysteine-type endopeptidase activity involved in apoptotic process	6/679	59/13456	0.0759717455339652	0.237679302866398	0.181815542938222	12122/17869/21926/12125/107607/215114	6
GO:0035282	segmentation	6/679	59/13456	0.0759717455339652	0.237679302866398	0.181815542938222	18186/18187/18128/235542/16658/67122	6
GO:0061178	regulation of insulin secretion involved in cellular response to glucose stimulus	6/679	59/13456	0.0759717455339652	0.237679302866398	0.181815542938222	19015/15251/50873/18576/68667/667118	6
GO:0001945	lymph vessel development	3/679	20/13456	0.0769993410749453	0.239109566035125	0.182909639359031	20963/22339/12168	3
GO:0003209	cardiac atrium morphogenesis	3/679	20/13456	0.0769993410749453	0.239109566035125	0.182909639359031	18128/12156/12168	3
GO:0010893	positive regulation of steroid biosynthetic process	3/679	20/13456	0.0769993410749453	0.239109566035125	0.182909639359031	11307/21926/110196	3
GO:0032689	negative regulation of interferon-gamma production	3/679	20/13456	0.0769993410749453	0.239109566035125	0.182909639359031	171285/213208/257632	3
GO:0033198	response to ATP	3/679	20/13456	0.0769993410749453	0.239109566035125	0.182909639359031	16176/20190/68667	3
GO:0035025	positive regulation of Rho protein signal transduction	3/679	20/13456	0.0769993410749453	0.239109566035125	0.182909639359031	17207/67168/244418	3
GO:0035850	epithelial cell differentiation involved in kidney development	3/679	20/13456	0.0769993410749453	0.239109566035125	0.182909639359031	18591/18128/19277	3
GO:0045686	negative regulation of glial cell differentiation	3/679	20/13456	0.0769993410749453	0.239109566035125	0.182909639359031	15205/18128/15364	3
GO:0046426	negative regulation of receptor signaling pathway via JAK-STAT	3/679	20/13456	0.0769993410749453	0.239109566035125	0.182909639359031	12702/12051/15364	3
GO:1905314	semi-lunar valve development	3/679	20/13456	0.0769993410749453	0.239109566035125	0.182909639359031	18128/12156/12168	3
GO:0032412	regulation of ion transmembrane transporter activity	13/679	166/13456	0.0770067275499765	0.239109566035125	0.182909639359031	26556/19739/83433/18578/20296/100503659/57780/18821/279561/12856/216856/19204/19229	13
GO:2001234	negative regulation of apoptotic signaling pathway	15/679	199/13456	0.0787002163403065	0.244201352952335	0.186804660893147	29813/12122/15251/12759/20583/50873/22339/21926/18186/16176/15505/19225/79201/223701/414801	15
GO:1903578	regulation of ATP metabolic process	7/679	74/13456	0.0789900060911801	0.244810008771809	0.187270259230678	74747/15251/17869/50873/83433/21926/12495	7
GO:0050808	synapse organization	22/679	316/13456	0.0790039329713943	0.244810008771809	0.187270259230678	18591/12032/26556/16560/83433/21926/18186/18187/26570/24088/19277/58235/12217/17920/21983/233489/217692/59036/14362/216856/211323/239027	22
GO:0001959	regulation of cytokine-mediated signaling pathway	8/679	89/13456	0.0798356084562791	0.247154567101008	0.189063756352357	15251/20963/50873/83433/54123/16193/16177/77128	8
GO:0048545	response to steroid hormone	12/679	151/13456	0.0798691494300489	0.247154567101008	0.189063756352357	83383/74747/15468/67731/21926/16193/20750/11839/77128/104263/15364/224829	12
GO:0001954	positive regulation of cell-matrix adhesion	5/679	46/13456	0.0806994857172722	0.248640350740995	0.190200323802426	22339/18186/20130/12571/19229	5
GO:0003143	embryonic heart tube morphogenesis	5/679	46/13456	0.0806994857172722	0.248640350740995	0.190200323802426	21385/15251/15205/18128/17684	5
GO:0050435	amyloid-beta metabolic process	5/679	46/13456	0.0806994857172722	0.248640350740995	0.190200323802426	12759/11307/21926/239606/233489	5
GO:1903510	mucopolysaccharide metabolic process	5/679	46/13456	0.0806994857172722	0.248640350740995	0.190200323802426	18591/209378/16176/16168/53374	5
GO:1990928	response to amino acid starvation	5/679	46/13456	0.0806994857172722	0.248640350740995	0.190200323802426	21425/11910/22241/75747/68441	5
GO:0002792	negative regulation of peptide secretion	6/679	60/13456	0.0810047539870159	0.248640350740995	0.190200323802426	13121/58185/50873/16176/18576/75767	6
GO:0006835	dicarboxylic acid transport	6/679	60/13456	0.0810047539870159	0.248640350740995	0.190200323802426	21926/54393/14725/16176/26570/17920	6
GO:0030510	regulation of BMP signaling pathway	6/679	60/13456	0.0810047539870159	0.248640350740995	0.190200323802426	15205/18128/14725/22057/14362/12168	6
GO:0034109	homotypic cell-cell adhesion	6/679	60/13456	0.0810047539870159	0.248640350740995	0.190200323802426	15170/56193/20963/26570/20912/72828	6
GO:0051963	regulation of synapse assembly	6/679	60/13456	0.0810047539870159	0.248640350740995	0.190200323802426	24088/58235/21983/217692/14362/216856	6
GO:1903035	negative regulation of response to wounding	6/679	60/13456	0.0810047539870159	0.248640350740995	0.190200323802426	18591/18792/21926/72828/21825/21824	6
GO:2000243	positive regulation of reproductive process	6/679	60/13456	0.0810047539870159	0.248640350740995	0.190200323802426	18792/22339/17684/16323/19204/243866	6
GO:1902806	regulation of cell cycle G1/S phase transition	10/679	120/13456	0.0814627129815086	0.249877540088832	0.191146726161747	12576/15170/12122/75604/15468/11504/20293/59036/69068/12443	10
GO:1905114	cell surface receptor signaling pathway involved in cell-cell signaling	25/679	369/13456	0.0823218298247428	0.25184368975968	0.192650755185695	17295/17869/20583/50873/18128/12156/24088/56811/19277/22420/17342/68667/13653/235542/59036/14362/216856/15364/19229/723827/12443/20668/67122/629378/387174	25
GO:0010952	positive regulation of peptidase activity	11/679	136/13456	0.0825800983115563	0.25184368975968	0.192650755185695	12122/83383/20963/17869/21926/12125/79201/107607/233489/215114/17196	11
GO:0007193	adenylate cyclase-inhibiting G protein-coupled receptor signaling pathway	4/679	33/13456	0.0827122838731813	0.25184368975968	0.192650755185695	54393/19735/14764/208990	4
GO:0009593	detection of chemical stimulus	4/679	33/13456	0.0827122838731813	0.25184368975968	0.192650755185695	14686/83433/24088/257632	4
GO:0016101	diterpenoid metabolic process	4/679	33/13456	0.0827122838731813	0.25184368975968	0.192650755185695	19015/77974/19682/20148	4
GO:0033628	regulation of cell adhesion mediated by integrin	4/679	33/13456	0.0827122838731813	0.25184368975968	0.192650755185695	15170/20963/18792/20583	4
GO:0045776	negative regulation of blood pressure	4/679	33/13456	0.0827122838731813	0.25184368975968	0.192650755185695	11622/21926/19204/12168	4
GO:0045840	positive regulation of mitotic nuclear division	4/679	33/13456	0.0827122838731813	0.25184368975968	0.192650755185695	18591/17295/21926/16176	4
GO:0050922	negative regulation of chemotaxis	4/679	33/13456	0.0827122838731813	0.25184368975968	0.192650755185695	18186/18128/20293/21825	4
GO:1902001	fatty acid transmembrane transport	4/679	33/13456	0.0827122838731813	0.25184368975968	0.192650755185695	21926/26570/384783/21825	4
GO:2000249	regulation of actin cytoskeleton reorganization	4/679	33/13456	0.0827122838731813	0.25184368975968	0.192650755185695	15162/18186/12985/19229	4
GO:0046942	carboxylic acid transport	13/679	168/13456	0.0827957247902002	0.25192923746323	0.192716195895006	20493/20963/17869/21926/54393/19735/14725/16176/26570/74152/26970/208638/17920	13
GO:0007612	learning	9/679	105/13456	0.083115823721835	0.252734288297791	0.193332028880097	12227/15251/50873/26570/24088/15572/19225/21983/231380	9
GO:0006641	triglyceride metabolic process	7/679	75/13456	0.0835399149867064	0.252763562524245	0.19335442253959	16956/14245/17691/64898/14933/231510/11810	7
GO:1900407	regulation of cellular response to oxidative stress	7/679	75/13456	0.0835399149867064	0.252763562524245	0.19335442253959	17295/15251/50873/21926/26570/15505/14362	7
GO:1901879	regulation of protein depolymerization	7/679	75/13456	0.0835399149867064	0.252763562524245	0.19335442253959	18008/56193/14026/68732/21916/17755/140810	7
GO:1901654	response to ketone	8/679	90/13456	0.0839696721711662	0.252763562524245	0.19335442253959	83383/11622/74747/67731/20750/18821/224829/723827	8
GO:0061564	axon development	24/679	353/13456	0.0847406950220774	0.252763562524245	0.19335442253959	14025/29869/18612/380684/14026/22339/11302/18186/18187/16782/18128/14725/11787/22241/19277/140571/171207/58235/226841/233489/217692/17755/211323/12168	24
GO:0009913	epidermal cell differentiation	10/679	121/13456	0.085017820254542	0.252763562524245	0.19335442253959	18612/18755/15205/18128/14284/17921/19143/19225/17920/56338	10
GO:0060401	cytosolic calcium ion transport	10/679	121/13456	0.085017820254542	0.252763562524245	0.19335442253959	15170/19739/76137/20190/72828/15945/18821/233979/12766/19229	10
GO:1990830	cellular response to leukemia inhibitory factor	10/679	121/13456	0.085017820254542	0.252763562524245	0.19335442253959	20810/17865/71371/380684/23792/18187/20750/16468/12702/104263	10
GO:1902903	regulation of supramolecular fiber organization	21/679	302/13456	0.0854127467452387	0.252763562524245	0.19335442253959	12576/17295/56193/14026/68732/12759/50873/18186/24088/21916/11856/260409/101497/12985/72754/15901/17755/19229/78321/140810/99889	21
GO:0046890	regulation of lipid biosynthetic process	11/679	137/13456	0.0859325202601404	0.252763562524245	0.19335442253959	18591/14245/20583/11307/17691/21926/12156/16176/19225/13653/110196	11
GO:0006140	regulation of nucleotide metabolic process	6/679	61/13456	0.0862194693605189	0.252763562524245	0.19335442253959	74747/15251/17869/50873/83433/12495	6
GO:0042632	cholesterol homeostasis	6/679	61/13456	0.0862194693605189	0.252763562524245	0.19335442253959	11303/16956/11307/19883/69863/235283	6
GO:0061912	selective autophagy	6/679	61/13456	0.0862194693605189	0.252763562524245	0.19335442253959	50873/329015/24088/22241/107607/257632	6
GO:1900542	regulation of purine nucleotide metabolic process	6/679	61/13456	0.0862194693605189	0.252763562524245	0.19335442253959	74747/15251/17869/50873/83433/12495	6
GO:0051402	neuron apoptotic process	17/679	235/13456	0.086375536698842	0.252763562524245	0.19335442253959	20302/18008/17865/12227/15251/50873/22339/21926/11302/18186/12125/16176/15505/20293/79201/13653/19229	17
GO:0002888	positive regulation of myeloid leukocyte mediated immunity	3/679	21/13456	0.0866045015869579	0.252763562524245	0.19335442253959	68891/19204/15040	3
GO:0032288	myelin assembly	3/679	21/13456	0.0866045015869579	0.252763562524245	0.19335442253959	72948/24088/14733	3
GO:0035136	forelimb morphogenesis	3/679	21/13456	0.0866045015869579	0.252763562524245	0.19335442253959	14013/244585/12393	3
GO:0046885	regulation of hormone biosynthetic process	3/679	21/13456	0.0866045015869579	0.252763562524245	0.19335442253959	15251/12156/13653	3
GO:0048535	lymph node development	3/679	21/13456	0.0866045015869579	0.252763562524245	0.19335442253959	16994/16168/319817	3
GO:0050974	detection of mechanical stimulus involved in sensory perception	3/679	21/13456	0.0866045015869579	0.252763562524245	0.19335442253959	17869/21926/110789	3
GO:0060259	regulation of feeding behavior	3/679	21/13456	0.0866045015869579	0.252763562524245	0.19335442253959	73094/17201/242864	3
GO:0072337	modified amino acid transport	3/679	21/13456	0.0866045015869579	0.252763562524245	0.19335442253959	14725/26570/56517	3
GO:0072525	pyridine-containing compound biosynthetic process	3/679	21/13456	0.0866045015869579	0.252763562524245	0.19335442253959	266645/67375/226518	3
GO:0150077	regulation of neuroinflammatory response	3/679	21/13456	0.0866045015869579	0.252763562524245	0.19335442253959	57781/83433/19225	3
GO:1904893	negative regulation of receptor signaling pathway via STAT	3/679	21/13456	0.0866045015869579	0.252763562524245	0.19335442253959	12702/12051/15364	3
GO:0014911	positive regulation of smooth muscle cell migration	5/679	47/13456	0.0867558741763161	0.252763562524245	0.19335442253959	18591/18792/17869/11504/13653	5
GO:0015800	acidic amino acid transport	5/679	47/13456	0.0867558741763161	0.252763562524245	0.19335442253959	21926/54393/16176/26570/17920	5
GO:0031529	ruffle organization	5/679	47/13456	0.0867558741763161	0.252763562524245	0.19335442253959	56193/14245/14026/68732/353047	5
GO:0042733	embryonic digit morphogenesis	5/679	47/13456	0.0867558741763161	0.252763562524245	0.19335442253959	21385/18128/12125/73692/140810	5
GO:1904705	regulation of vascular associated smooth muscle cell proliferation	5/679	47/13456	0.0867558741763161	0.252763562524245	0.19335442253959	18591/12576/11504/21926/18569	5
GO:1990874	vascular associated smooth muscle cell proliferation	5/679	47/13456	0.0867558741763161	0.252763562524245	0.19335442253959	18591/12576/11504/21926/18569	5
GO:0001976	nervous system process involved in regulation of systemic arterial blood pressure	2/679	10/13456	0.0874566368575759	0.252763562524245	0.19335442253959	20112/78286	2
GO:0002883	regulation of hypersensitivity	2/679	10/13456	0.0874566368575759	0.252763562524245	0.19335442253959	213208/15040	2
GO:0003183	mitral valve morphogenesis	2/679	10/13456	0.0874566368575759	0.252763562524245	0.19335442253959	18128/12168	2
GO:0003323	type B pancreatic cell development	2/679	10/13456	0.0874566368575759	0.252763562524245	0.19335442253959	12571/19726	2
GO:0006534	cysteine metabolic process	2/679	10/13456	0.0874566368575759	0.252763562524245	0.19335442253959	26570/22117	2
GO:0006700	C21-steroid hormone biosynthetic process	2/679	10/13456	0.0874566368575759	0.252763562524245	0.19335442253959	12156/13653	2
GO:0007350	blastoderm segmentation	2/679	10/13456	0.0874566368575759	0.252763562524245	0.19335442253959	18186/18187	2
GO:0009086	methionine biosynthetic process	2/679	10/13456	0.0874566368575759	0.252763562524245	0.19335442253959	67873/66902	2
GO:0010002	cardioblast differentiation	2/679	10/13456	0.0874566368575759	0.252763562524245	0.19335442253959	21385/18128	2
GO:0010819	regulation of T cell chemotaxis	2/679	10/13456	0.0874566368575759	0.252763562524245	0.19335442253959	15945/12772	2
GO:0010832	negative regulation of myotube differentiation	2/679	10/13456	0.0874566368575759	0.252763562524245	0.19335442253959	18128/79362	2
GO:0014850	response to muscle activity	2/679	10/13456	0.0874566368575759	0.252763562524245	0.19335442253959	15251/442846	2
GO:0015911	long-chain fatty acid import across plasma membrane	2/679	10/13456	0.0874566368575759	0.252763562524245	0.19335442253959	384783/21825	2
GO:0030449	regulation of complement activation	2/679	10/13456	0.0874566368575759	0.252763562524245	0.19335442253959	16176/12509	2
GO:0031392	regulation of prostaglandin biosynthetic process	2/679	10/13456	0.0874566368575759	0.252763562524245	0.19335442253959	16176/19225	2
GO:0031642	negative regulation of myelination	2/679	10/13456	0.0874566368575759	0.252763562524245	0.19335442253959	14245/21926	2
GO:0032736	positive regulation of interleukin-13 production	2/679	10/13456	0.0874566368575759	0.252763562524245	0.19335442253959	16364/15040	2
GO:0032959	inositol trisphosphate biosynthetic process	2/679	10/13456	0.0874566368575759	0.252763562524245	0.19335442253959	19204/19229	2
GO:0034116	positive regulation of heterotypic cell-cell adhesion	2/679	10/13456	0.0874566368575759	0.252763562524245	0.19335442253959	21926/16176	2
GO:0034163	regulation of toll-like receptor 9 signaling pathway	2/679	10/13456	0.0874566368575759	0.252763562524245	0.19335442253959	58185/19260	2
GO:0038065	collagen-activated signaling pathway	2/679	10/13456	0.0874566368575759	0.252763562524245	0.19335442253959	20963/72828	2
GO:0040009	regulation of growth rate	2/679	10/13456	0.0874566368575759	0.252763562524245	0.19335442253959	11622/18128	2
GO:0042359	vitamin D metabolic process	2/679	10/13456	0.0874566368575759	0.252763562524245	0.19335442253959	20583/21926	2
GO:0042448	progesterone metabolic process	2/679	10/13456	0.0874566368575759	0.252763562524245	0.19335442253959	78925/13653	2
GO:0042572	retinol metabolic process	2/679	10/13456	0.0874566368575759	0.252763562524245	0.19335442253959	77974/20148	2
GO:0043619	regulation of transcription from RNA polymerase II promoter in response to oxidative stress	2/679	10/13456	0.0874566368575759	0.252763562524245	0.19335442253959	15251/13819	2
GO:0045602	negative regulation of endothelial cell differentiation	2/679	10/13456	0.0874566368575759	0.252763562524245	0.19335442253959	22339/15901	2
GO:0046049	UMP metabolic process	2/679	10/13456	0.0874566368575759	0.252763562524245	0.19335442253959	80914/99586	2
GO:0048070	regulation of developmental pigmentation	2/679	10/13456	0.0874566368575759	0.252763562524245	0.19335442253959	17311/12125	2
GO:0050910	detection of mechanical stimulus involved in sensory perception of sound	2/679	10/13456	0.0874566368575759	0.252763562524245	0.19335442253959	17869/110789	2
GO:0060457	negative regulation of digestive system process	2/679	10/13456	0.0874566368575759	0.252763562524245	0.19335442253959	19216/279561	2
GO:0061042	vascular wound healing	2/679	10/13456	0.0874566368575759	0.252763562524245	0.19335442253959	22339/21926	2
GO:0070278	extracellular matrix constituent secretion	2/679	10/13456	0.0874566368575759	0.252763562524245	0.19335442253959	18128/12156	2
GO:0070986	left/right axis specification	2/679	10/13456	0.0874566368575759	0.252763562524245	0.19335442253959	18128/17684	2
GO:0071397	cellular response to cholesterol	2/679	10/13456	0.0874566368575759	0.252763562524245	0.19335442253959	235283/16323	2
GO:0090209	negative regulation of triglyceride metabolic process	2/679	10/13456	0.0874566368575759	0.252763562524245	0.19335442253959	17691/11810	2
GO:0097091	synaptic vesicle clustering	2/679	10/13456	0.0874566368575759	0.252763562524245	0.19335442253959	233489/216856	2
GO:0106072	negative regulation of adenylate cyclase-activating G protein-coupled receptor signaling pathway	2/679	10/13456	0.0874566368575759	0.252763562524245	0.19335442253959	18578/105171	2
GO:1902287	semaphorin-plexin signaling pathway involved in axon guidance	2/679	10/13456	0.0874566368575759	0.252763562524245	0.19335442253959	18186/140571	2
GO:1902946	protein localization to early endosome	2/679	10/13456	0.0874566368575759	0.252763562524245	0.19335442253959	22339/18186	2
GO:1902947	regulation of tau-protein kinase activity	2/679	10/13456	0.0874566368575759	0.252763562524245	0.19335442253959	12759/13653	2
GO:1903236	regulation of leukocyte tethering or rolling	2/679	10/13456	0.0874566368575759	0.252763562524245	0.19335442253959	12772/19204	2
GO:1903671	negative regulation of sprouting angiogenesis	2/679	10/13456	0.0874566368575759	0.252763562524245	0.19335442253959	21825/16598	2
GO:1905048	regulation of metallopeptidase activity	2/679	10/13456	0.0874566368575759	0.252763562524245	0.19335442253959	233489/17196	2
GO:2000434	regulation of protein neddylation	2/679	10/13456	0.0874566368575759	0.252763562524245	0.19335442253959	15251/13819	2
GO:2001269	positive regulation of cysteine-type endopeptidase activity involved in apoptotic signaling pathway	2/679	10/13456	0.0874566368575759	0.252763562524245	0.19335442253959	83383/79201	2
GO:0110053	regulation of actin filament organization	16/679	219/13456	0.0880524212178149	0.25432399833978	0.194548096038293	17295/56193/14026/68732/50873/18186/24088/21916/11856/260409/101497/12985/72754/15901/19229/99889	16
GO:0048593	camera-type eye morphogenesis	8/679	91/13456	0.0882273503452819	0.25434509105239	0.194564231153757	21385/14686/15251/22339/29815/58235/244585/17684	8
GO:0055007	cardiac muscle cell differentiation	8/679	91/13456	0.0882273503452819	0.25434509105239	0.194564231153757	17295/22339/74116/17691/19735/12156/110196/211323	8
GO:0097553	calcium ion transmembrane import into cytosol	8/679	91/13456	0.0882273503452819	0.25434509105239	0.194564231153757	15170/20190/72828/15945/18821/233979/12766/19229	8
GO:0001764	neuron migration	10/679	122/13456	0.0886659184622322	0.255286059987401	0.195284036268227	17295/215690/74747/22339/18186/18187/16177/11787/223701/211323	10
GO:1990823	response to leukemia inhibitory factor	10/679	122/13456	0.0886659184622322	0.255286059987401	0.195284036268227	20810/17865/71371/380684/23792/18187/20750/16468/12702/104263	10
GO:0050806	positive regulation of synaptic transmission	11/679	138/13456	0.0893675362131959	0.257143504957312	0.196704910368788	20620/21926/19225/20296/12772/216856/18733/19229/723827/387217/387174	11
GO:0015711	organic anion transport	15/679	203/13456	0.0895847080321681	0.257605553355925	0.197058359657155	117591/20493/20963/17869/21926/54393/240726/19735/14725/16176/26570/74152/26970/208638/17920	15
GO:0051493	regulation of cytoskeleton organization	28/679	425/13456	0.0899837779893033	0.258356368425523	0.197632704363988	12576/15162/18008/17295/69288/56193/14026/68732/72948/50873/212307/18186/24088/21916/15505/11856/28105/260409/101497/12985/72754/15901/17755/19229/78321/140810/15511/99889	28
GO:0032768	regulation of monooxygenase activity	4/679	34/13456	0.0901863509288567	0.258356368425523	0.197632704363988	21926/16176/107607/19229	4
GO:0034204	lipid translocation	4/679	34/13456	0.0901863509288567	0.258356368425523	0.197632704363988	11303/11981/235527/16534	4
GO:0046621	negative regulation of organ growth	4/679	34/13456	0.0901863509288567	0.258356368425523	0.197632704363988	74116/19735/16468/17684	4
GO:0086003	cardiac muscle cell contraction	4/679	34/13456	0.0901863509288567	0.258356368425523	0.197632704363988	18578/68667/18821/16518	4
GO:2000008	regulation of protein localization to cell surface	4/679	34/13456	0.0901863509288567	0.258356368425523	0.197632704363988	15216/21926/233489/211323	4
GO:1901215	negative regulation of neuron death	14/679	187/13456	0.09091876008203	0.25982456858553	0.198755821126846	18008/12227/15251/57781/50873/22339/16193/18186/26570/15505/20293/12985/14362/19229	14
GO:0002821	positive regulation of adaptive immune response	9/679	107/13456	0.0909842623737553	0.25982456858553	0.198755821126846	14991/58185/21926/16193/16177/16176/12772/257632/15040	9
GO:0035107	appendage morphogenesis	9/679	107/13456	0.0909842623737553	0.25982456858553	0.198755821126846	21385/18128/12125/14013/68099/244585/12393/73692/140810	9
GO:0035108	limb morphogenesis	9/679	107/13456	0.0909842623737553	0.25982456858553	0.198755821126846	21385/18128/12125/14013/68099/244585/12393/73692/140810	9
GO:0044706	multi-multicellular organism process	9/679	107/13456	0.0909842623737553	0.25982456858553	0.198755821126846	19015/171285/22339/19225/12142/17684/19204/12168/21824	9
GO:0007015	actin filament organization	23/679	339/13456	0.0915412849681074	0.260805944318806	0.199506535890901	17295/69288/56193/14026/68732/50873/18186/24088/21916/17921/11856/12927/17920/260409/101497/12985/677884/215114/72754/15901/19229/17118/99889	23
GO:0046683	response to organophosphorus	6/679	62/13456	0.0916143903703365	0.260805944318806	0.199506535890901	11622/16176/20190/68667/12916/442846	6
GO:0055092	sterol homeostasis	6/679	62/13456	0.0916143903703365	0.260805944318806	0.199506535890901	11303/16956/11307/19883/69863/235283	6
GO:0098659	inorganic cation import across plasma membrane	6/679	62/13456	0.0916143903703365	0.260805944318806	0.199506535890901	15216/227059/68667/279561/16518/16522	6
GO:0099587	inorganic ion import across plasma membrane	6/679	62/13456	0.0916143903703365	0.260805944318806	0.199506535890901	15216/227059/68667/279561/16518/16522	6
GO:0022898	regulation of transmembrane transporter activity	13/679	171/13456	0.0919833776848031	0.261692709513265	0.200184877224558	26556/19739/83433/18578/20296/100503659/57780/18821/279561/12856/216856/19204/19229	13
GO:1901652	response to peptide	21/679	305/13456	0.0922570152168561	0.262307266250549	0.200654989537697	16956/14245/15370/83433/64898/18128/19262/16176/19260/20912/29815/18576/12927/75747/235442/107607/13653/384783/12702/257632/12096	21
GO:0042552	myelination	10/679	123/13456	0.0924069610452675	0.262486181437342	0.200791852787607	14245/72948/12759/21926/24088/14733/17196/225608/211323/387217	10
GO:0007565	female pregnancy	8/679	92/13456	0.0926082617285526	0.262486181437342	0.200791852787607	19015/171285/22339/19225/12142/17684/12168/21824	8
GO:0009799	specification of symmetry	8/679	92/13456	0.0926082617285526	0.262486181437342	0.200791852787607	21385/13411/15251/18128/244585/231214/17684/19726	8
GO:0009855	determination of bilateral symmetry	8/679	92/13456	0.0926082617285526	0.262486181437342	0.200791852787607	21385/13411/15251/18128/244585/231214/17684/19726	8
GO:1904019	epithelial cell apoptotic process	8/679	92/13456	0.0926082617285526	0.262486181437342	0.200791852787607	57875/12122/14991/21926/18569/20293/21825/12168	8
GO:0002221	pattern recognition receptor signaling pathway	11/679	139/13456	0.0928851600055079	0.263062925333192	0.201233039728564	171285/58185/16364/21926/71398/54123/19260/24088/107607/12475/257632	11
GO:0045773	positive regulation of axon extension	5/679	48/13456	0.0930429063678471	0.263062925333192	0.201233039728564	22339/18186/17755/211323/12168	5
GO:0048146	positive regulation of fibroblast proliferation	5/679	48/13456	0.0930429063678471	0.263062925333192	0.201233039728564	18591/23834/17869/14284/12571	5
GO:0120254	olefinic compound metabolic process	5/679	48/13456	0.0930429063678471	0.263062925333192	0.201233039728564	78925/12156/19225/13653/13849	5
GO:2001257	regulation of cation channel activity	9/679	108/13456	0.0950774607132485	0.268648417856429	0.205505727099498	26556/19739/83433/18578/20296/100503659/18821/216856/19229	9
GO:0002053	positive regulation of mesenchymal cell proliferation	3/679	22/13456	0.0966865618084068	0.270674802799427	0.2070558337944	17869/22339/384783	3
GO:0006775	fat-soluble vitamin metabolic process	3/679	22/13456	0.0966865618084068	0.270674802799427	0.2070558337944	19015/20583/21926	3
GO:0010742	macrophage derived foam cell differentiation	3/679	22/13456	0.0966865618084068	0.270674802799427	0.2070558337944	16956/18755/11307	3
GO:0010922	positive regulation of phosphatase activity	3/679	22/13456	0.0966865618084068	0.270674802799427	0.2070558337944	56193/227059/12156	3
GO:0030224	monocyte differentiation	3/679	22/13456	0.0966865618084068	0.270674802799427	0.2070558337944	17869/22339/12571	3
GO:0033273	response to vitamin	3/679	22/13456	0.0966865618084068	0.270674802799427	0.2070558337944	20583/20750/12096	3
GO:0035024	negative regulation of Rho protein signal transduction	3/679	22/13456	0.0966865618084068	0.270674802799427	0.2070558337944	17295/12053/106952	3
GO:0035137	hindlimb morphogenesis	3/679	22/13456	0.0966865618084068	0.270674802799427	0.2070558337944	18128/14013/244585	3
GO:0045780	positive regulation of bone resorption	3/679	22/13456	0.0966865618084068	0.270674802799427	0.2070558337944	20963/20750/353047	3
GO:0046339	diacylglycerol metabolic process	3/679	22/13456	0.0966865618084068	0.270674802799427	0.2070558337944	110197/227333/11727	3
GO:0048668	collateral sprouting	3/679	22/13456	0.0966865618084068	0.270674802799427	0.2070558337944	14025/29869/22241	3
GO:0050901	leukocyte tethering or rolling	3/679	22/13456	0.0966865618084068	0.270674802799427	0.2070558337944	21926/12772/19204	3
GO:0055081	anion homeostasis	3/679	22/13456	0.0966865618084068	0.270674802799427	0.2070558337944	12709/26570/20750	3
GO:0055090	acylglycerol homeostasis	3/679	22/13456	0.0966865618084068	0.270674802799427	0.2070558337944	57875/16956/19883	3
GO:0070328	triglyceride homeostasis	3/679	22/13456	0.0966865618084068	0.270674802799427	0.2070558337944	57875/16956/19883	3
GO:0034330	cell junction organization	32/679	499/13456	0.0968944406508143	0.271090039239402	0.207373473731371	18591/12032/26556/16560/18755/20583/22339/83433/212307/21926/18186/18187/19262/16176/26570/24088/19277/11856/58235/12217/17920/21983/235442/233489/217692/59036/14362/216856/68891/19229/211323/239027	32
GO:0032006	regulation of TOR signaling	8/679	93/13456	0.0971118759628276	0.271364800112211	0.207583655251872	74747/71962/15251/83433/231510/75747/70713/68441	8
GO:0038127	ERBB signaling pathway	8/679	93/13456	0.0971118759628276	0.271364800112211	0.207583655251872	215653/29815/11839/12927/215114/225608/19229/227333	8
GO:0031952	regulation of protein autophosphorylation	4/679	35/13456	0.0979714647136289	0.272096465757437	0.208143351384146	18591/20963/22339/215653	4
GO:0035315	hair cell differentiation	4/679	35/13456	0.0979714647136289	0.272096465757437	0.208143351384146	15205/18128/17921/17920	4
GO:0042246	tissue regeneration	4/679	35/13456	0.0979714647136289	0.272096465757437	0.208143351384146	19015/12576/18792/21682	4
GO:0043090	amino acid import	4/679	35/13456	0.0979714647136289	0.272096465757437	0.208143351384146	21926/19735/26570/208638	4
GO:0045604	regulation of epidermal cell differentiation	4/679	35/13456	0.0979714647136289	0.272096465757437	0.208143351384146	18612/18755/15205/18128	4
GO:0060043	regulation of cardiac muscle cell proliferation	4/679	35/13456	0.0979714647136289	0.272096465757437	0.208143351384146	21385/18128/16468/17684	4
GO:0060711	labyrinthine layer development	4/679	35/13456	0.0979714647136289	0.272096465757437	0.208143351384146	15205/19143/226841/12702	4
GO:0061383	trabecula morphogenesis	4/679	35/13456	0.0979714647136289	0.272096465757437	0.208143351384146	11504/22339/53945/18128	4
GO:2000279	negative regulation of DNA biosynthetic process	4/679	35/13456	0.0979714647136289	0.272096465757437	0.208143351384146	11622/98956/13134/12168	4
GO:2001239	regulation of extrinsic apoptotic signaling pathway in absence of ligand	4/679	35/13456	0.0979714647136289	0.272096465757437	0.208143351384146	20583/21926/16176/16323	4
GO:0003208	cardiac ventricle morphogenesis	5/679	49/13456	0.0995567164074671	0.275658256135517	0.210867984297542	11622/15251/17069/18128/14725	5
GO:0009123	nucleoside monophosphate metabolic process	5/679	49/13456	0.0995567164074671	0.275658256135517	0.210867984297542	14450/110639/80914/23959/99586	5
GO:0050854	regulation of antigen receptor-mediated signaling pathway	5/679	49/13456	0.0995567164074671	0.275658256135517	0.210867984297542	15170/18755/227059/19260/16534	5
GO:0051851	modulation by host of symbiont process	5/679	49/13456	0.0995567164074671	0.275658256135517	0.210867984297542	83383/20303/50873/16004/242864	5
GO:0070231	T cell apoptotic process	5/679	49/13456	0.0995567164074671	0.275658256135517	0.210867984297542	15251/20612/12125/79201/76088	5
GO:0051606	detection of stimulus	10/679	125/13456	0.100167277390783	0.277180210749448	0.212032221154189	14686/17869/83433/21926/24088/107607/13134/257632/110789/620246	10
GO:0030879	mammary gland development	8/679	94/13456	0.101737515382948	0.27744248714688	0.212232852530265	21385/18612/15251/22339/12125/11839/384783/12443	8
GO:0000187	activation of MAPK activity	7/679	79/13456	0.103203320931972	0.27744248714688	0.212232852530265	17295/20963/16012/21926/12156/16176/21825	7
GO:0046916	cellular transition metal ion homeostasis	7/679	79/13456	0.103203320931972	0.27744248714688	0.212232852530265	15216/15251/17869/227059/53945/68428/14725	7
GO:2001237	negative regulation of extrinsic apoptotic signaling pathway	7/679	79/13456	0.103203320931972	0.27744248714688	0.212232852530265	20583/22339/21926/18186/16176/79201/414801	7
GO:0002323	natural killer cell activation involved in immune response	2/679	11/13456	0.103431436882306	0.27744248714688	0.212232852530265	18106/74732	2
GO:0002829	negative regulation of type 2 immune response	2/679	11/13456	0.103431436882306	0.27744248714688	0.212232852530265	12053/12772	2
GO:0002903	negative regulation of B cell apoptotic process	2/679	11/13456	0.103431436882306	0.27744248714688	0.212232852530265	227059/384783	2
GO:0003156	regulation of animal organ formation	2/679	11/13456	0.103431436882306	0.27744248714688	0.212232852530265	12156/17684	2
GO:0003174	mitral valve development	2/679	11/13456	0.103431436882306	0.27744248714688	0.212232852530265	18128/12168	2
GO:0003198	epithelial to mesenchymal transition involved in endocardial cushion formation	2/679	11/13456	0.103431436882306	0.27744248714688	0.212232852530265	20583/18128	2
GO:0006555	methionine metabolic process	2/679	11/13456	0.103431436882306	0.27744248714688	0.212232852530265	67873/66902	2
GO:0009173	pyrimidine ribonucleoside monophosphate metabolic process	2/679	11/13456	0.103431436882306	0.27744248714688	0.212232852530265	80914/99586	2
GO:0009435	NAD biosynthetic process	2/679	11/13456	0.103431436882306	0.27744248714688	0.212232852530265	67375/226518	2
GO:0010713	negative regulation of collagen metabolic process	2/679	11/13456	0.103431436882306	0.27744248714688	0.212232852530265	19015/16193	2
GO:0010744	positive regulation of macrophage derived foam cell differentiation	2/679	11/13456	0.103431436882306	0.27744248714688	0.212232852530265	16956/18755	2
GO:0030002	cellular anion homeostasis	2/679	11/13456	0.103431436882306	0.27744248714688	0.212232852530265	12709/20750	2
GO:0030157	pancreatic juice secretion	2/679	11/13456	0.103431436882306	0.27744248714688	0.212232852530265	279561/17386	2
GO:0030656	regulation of vitamin metabolic process	2/679	11/13456	0.103431436882306	0.27744248714688	0.212232852530265	20583/21926	2
GO:0030836	positive regulation of actin filament depolymerization	2/679	11/13456	0.103431436882306	0.27744248714688	0.212232852530265	56193/68732	2
GO:0032488	Cdc42 protein signal transduction	2/679	11/13456	0.103431436882306	0.27744248714688	0.212232852530265	11303/18186	2
GO:0032966	negative regulation of collagen biosynthetic process	2/679	11/13456	0.103431436882306	0.27744248714688	0.212232852530265	19015/16193	2
GO:0034350	regulation of glial cell apoptotic process	2/679	11/13456	0.103431436882306	0.27744248714688	0.212232852530265	18755/20293	2
GO:0034374	low-density lipoprotein particle remodeling	2/679	11/13456	0.103431436882306	0.27744248714688	0.212232852530265	11307/26970	2
GO:0035745	T-helper 2 cell cytokine production	2/679	11/13456	0.103431436882306	0.27744248714688	0.212232852530265	58185/16193	2
GO:0035791	platelet-derived growth factor receptor-beta signaling pathway	2/679	11/13456	0.103431436882306	0.27744248714688	0.212232852530265	18591/215114	2
GO:0042362	fat-soluble vitamin biosynthetic process	2/679	11/13456	0.103431436882306	0.27744248714688	0.212232852530265	20583/21926	2
GO:0042730	fibrinolysis	2/679	11/13456	0.103431436882306	0.27744248714688	0.212232852530265	18792/21825	2
GO:0043129	surfactant homeostasis	2/679	11/13456	0.103431436882306	0.27744248714688	0.212232852530265	22339/13819	2
GO:0043922	negative regulation by host of viral transcription	2/679	11/13456	0.103431436882306	0.27744248714688	0.212232852530265	83383/20303	2
GO:0044406	adhesion of symbiont to host	2/679	11/13456	0.103431436882306	0.27744248714688	0.212232852530265	236573/58235	2
GO:0044766	multi-organism transport	2/679	11/13456	0.103431436882306	0.27744248714688	0.212232852530265	20612/233979	2
GO:0045591	positive regulation of regulatory T cell differentiation	2/679	11/13456	0.103431436882306	0.27744248714688	0.212232852530265	14991/12053	2
GO:0045647	negative regulation of erythrocyte differentiation	2/679	11/13456	0.103431436882306	0.27744248714688	0.212232852530265	16909/16658	2
GO:0046794	transport of virus	2/679	11/13456	0.103431436882306	0.27744248714688	0.212232852530265	20612/233979	2
GO:0048485	sympathetic nervous system development	2/679	11/13456	0.103431436882306	0.27744248714688	0.212232852530265	18186/18187	2
GO:0048521	negative regulation of behavior	2/679	11/13456	0.103431436882306	0.27744248714688	0.212232852530265	242864/105171	2
GO:0051561	positive regulation of mitochondrial calcium ion concentration	2/679	11/13456	0.103431436882306	0.27744248714688	0.212232852530265	76137/21817	2
GO:0051709	regulation of killing of cells of other organism	2/679	11/13456	0.103431436882306	0.27744248714688	0.212232852530265	20963/12125	2
GO:0051797	regulation of hair follicle development	2/679	11/13456	0.103431436882306	0.27744248714688	0.212232852530265	21926/16323	2
GO:0052646	alditol phosphate metabolic process	2/679	11/13456	0.103431436882306	0.27744248714688	0.212232852530265	14933/231510	2
GO:0060192	negative regulation of lipase activity	2/679	11/13456	0.103431436882306	0.27744248714688	0.212232852530265	57875/19735	2
GO:0060576	intestinal epithelial cell development	2/679	11/13456	0.103431436882306	0.27744248714688	0.212232852530265	15251/12142	2
GO:0061052	negative regulation of cell growth involved in cardiac muscle cell development	2/679	11/13456	0.103431436882306	0.27744248714688	0.212232852530265	74116/19735	2
GO:0071281	cellular response to iron ion	2/679	11/13456	0.103431436882306	0.27744248714688	0.212232852530265	15216/53945	2
GO:0071318	cellular response to ATP	2/679	11/13456	0.103431436882306	0.27744248714688	0.212232852530265	20190/68667	2
GO:0072010	glomerular epithelium development	2/679	11/13456	0.103431436882306	0.27744248714688	0.212232852530265	18591/19277	2
GO:0090183	regulation of kidney development	2/679	11/13456	0.103431436882306	0.27744248714688	0.212232852530265	17869/22339	2
GO:1901298	regulation of hydrogen peroxide-mediated programmed cell death	2/679	11/13456	0.103431436882306	0.27744248714688	0.212232852530265	17295/15505	2
GO:1902170	cellular response to reactive nitrogen species	2/679	11/13456	0.103431436882306	0.27744248714688	0.212232852530265	12927/21825	2
GO:1902579	multi-organism localization	2/679	11/13456	0.103431436882306	0.27744248714688	0.212232852530265	20612/233979	2
GO:1903977	positive regulation of glial cell migration	2/679	11/13456	0.103431436882306	0.27744248714688	0.212232852530265	83433/12772	2
GO:2000047	regulation of cell-cell adhesion mediated by cadherin	2/679	11/13456	0.103431436882306	0.27744248714688	0.212232852530265	22339/18128	2
GO:0048598	embryonic morphogenesis	28/679	432/13456	0.104230311159466	0.27942071637096	0.213746121948741	21385/109934/15251/17869/15205/18128/14725/12125/14013/17921/319520/19143/22420/244585/17920/240672/12393/231214/73692/17684/16323/17196/59036/14362/12702/12168/16658/140810	28
GO:0002253	activation of immune response	15/679	208/13456	0.104469144666152	0.279896142742981	0.214109804873226	15170/18755/20963/227059/16176/19260/24088/18578/21682/12927/12509/16534/257632/17060/319817	15
GO:0030111	regulation of Wnt signaling pathway	16/679	225/13456	0.10514086982823	0.28146322284118	0.215308560993115	20583/50873/18128/12156/24088/56811/19277/68667/13653/235542/59036/14362/15364/20668/67122/629378	16
GO:0031668	cellular response to extracellular stimulus	13/679	175/13456	0.105177711347286	0.28146322284118	0.215308560993115	57875/235036/16956/14281/58809/20583/21425/17691/11910/22241/75747/52639/68441	13
GO:0002762	negative regulation of myeloid leukocyte differentiation	4/679	36/13456	0.106058178423777	0.283153564917908	0.216601607794941	17869/72828/12571/16658	4
GO:0034113	heterotypic cell-cell adhesion	4/679	36/13456	0.106058178423777	0.283153564917908	0.216601607794941	57781/21926/16176/17196	4
GO:0060393	regulation of pathway-restricted SMAD protein phosphorylation	4/679	36/13456	0.106058178423777	0.283153564917908	0.216601607794941	15216/12156/16323/12168	4
GO:1902475	L-alpha-amino acid transmembrane transport	4/679	36/13456	0.106058178423777	0.283153564917908	0.216601607794941	21926/19735/26570/208638	4
GO:0050886	endocrine process	5/679	50/13456	0.106292960025626	0.283614041053136	0.216953854362172	20112/16176/75767/235442/16323	5
GO:0002701	negative regulation of production of molecular mediator of immune response	3/679	23/13456	0.107218764930021	0.283755708117126	0.217062224227974	15216/12053/21926	3
GO:0032967	positive regulation of collagen biosynthetic process	3/679	23/13456	0.107218764930021	0.283755708117126	0.217062224227974	18591/20296/210719	3
GO:0033238	regulation of cellular amine metabolic process	3/679	23/13456	0.107218764930021	0.283755708117126	0.217062224227974	50873/13819/26570	3
GO:0043552	positive regulation of phosphatidylinositol 3-kinase activity	3/679	23/13456	0.107218764930021	0.283755708117126	0.217062224227974	18591/257632/19229	3
GO:0045940	positive regulation of steroid metabolic process	3/679	23/13456	0.107218764930021	0.283755708117126	0.217062224227974	11307/21926/110196	3
GO:0046473	phosphatidic acid metabolic process	3/679	23/13456	0.107218764930021	0.283755708117126	0.217062224227974	14245/110197/227333	3
GO:0048011	neurotrophin TRK receptor signaling pathway	3/679	23/13456	0.107218764930021	0.283755708117126	0.217062224227974	74747/22241/12927	3
GO:0051767	nitric-oxide synthase biosynthetic process	3/679	23/13456	0.107218764930021	0.283755708117126	0.217062224227974	24088/20296/257632	3
GO:0051769	regulation of nitric-oxide synthase biosynthetic process	3/679	23/13456	0.107218764930021	0.283755708117126	0.217062224227974	24088/20296/257632	3
GO:0055094	response to lipoprotein particle	3/679	23/13456	0.107218764930021	0.283755708117126	0.217062224227974	16956/20963/208715	3
GO:0071709	membrane assembly	3/679	23/13456	0.107218764930021	0.283755708117126	0.217062224227974	233489/216856/73712	3
GO:0090077	foam cell differentiation	3/679	23/13456	0.107218764930021	0.283755708117126	0.217062224227974	16956/18755/11307	3
GO:0099054	presynapse assembly	3/679	23/13456	0.107218764930021	0.283755708117126	0.217062224227974	12217/14362/216856	3
GO:1903859	regulation of dendrite extension	3/679	23/13456	0.107218764930021	0.283755708117126	0.217062224227974	14025/50873/233489	3
GO:0043523	regulation of neuron apoptotic process	15/679	209/13456	0.107616968352833	0.284644067369027	0.217741784954385	20302/18008/17865/12227/15251/50873/22339/21926/18186/12125/16176/15505/20293/13653/19229	15
GO:0008643	carbohydrate transport	9/679	111/13456	0.10798850720395	0.285295232032723	0.218239900925966	117591/17295/22612/17869/21926/16176/20912/11832/384783	9
GO:2001056	positive regulation of cysteine-type endopeptidase activity	9/679	111/13456	0.10798850720395	0.285295232032723	0.218239900925966	12122/83383/20963/17869/21926/12125/79201/107607/215114	9
GO:0042770	signal transduction in response to DNA damage	7/679	80/13456	0.108479578876898	0.286260314810226	0.218978152204289	29813/12122/83383/20583/28019/17920/12051	7
GO:0055017	cardiac muscle tissue growth	7/679	80/13456	0.108479578876898	0.286260314810226	0.218978152204289	21385/74116/19735/18128/16468/17684/110196	7
GO:0007160	cell-matrix adhesion	12/679	160/13456	0.110368941560467	0.290908756214967	0.222534031439994	12032/18792/12053/22339/18186/19262/12125/11856/20130/21825/12571/19229	12
GO:0090092	regulation of transmembrane receptor protein serine/threonine kinase signaling pathway	12/679	160/13456	0.110368941560467	0.290908756214967	0.222534031439994	15216/15205/18128/14725/12156/22057/17684/21825/16323/257630/14362/12168	12
GO:0051348	negative regulation of transferase activity	16/679	227/13456	0.111259897381151	0.293087414860532	0.224200621672057	12576/15170/83383/17873/50873/16193/19735/16176/19260/19277/75590/319520/72828/240672/384783/235584	16
GO:0048259	regulation of receptor-mediated endocytosis	8/679	96/13456	0.111351435555243	0.293158898003161	0.224255303532156	15216/20963/12759/22339/73094/233489/215114/227333	8
GO:0060828	regulation of canonical Wnt signaling pathway	13/679	177/13456	0.112178703121463	0.295166159889537	0.225790781822817	20583/50873/18128/56811/19277/68667/13653/235542/59036/14362/20668/67122/629378	13
GO:0002763	positive regulation of myeloid leukocyte differentiation	5/679	51/13456	0.113246842919269	0.297289290062579	0.227414894904961	20302/17311/14281/83433/21926	5
GO:0042987	amyloid precursor protein catabolic process	5/679	51/13456	0.113246842919269	0.297289290062579	0.227414894904961	12759/11307/21926/239606/233489	5
GO:0050795	regulation of behavior	5/679	51/13456	0.113246842919269	0.297289290062579	0.227414894904961	16193/73094/17201/242864/105171	5
GO:0060113	inner ear receptor cell differentiation	5/679	51/13456	0.113246842919269	0.297289290062579	0.227414894904961	15205/18128/17921/17920/110789	5
GO:0031341	regulation of cell killing	7/679	81/13456	0.113897073779615	0.298651774104152	0.228457142895323	14991/171285/20963/12125/12509/20296/15040	7
GO:0048145	regulation of fibroblast proliferation	7/679	81/13456	0.113897073779615	0.298651774104152	0.228457142895323	18591/23834/17869/14284/12571/268857/13134	7
GO:0006470	protein dephosphorylation	15/679	211/13456	0.114083174622405	0.298967536488883	0.228698688998525	15170/21926/227059/19262/242083/19260/19277/75590/319520/72828/240672/107895/235542/235584/18733	15
GO:0002279	mast cell activation involved in immune response	4/679	37/13456	0.114436324981358	0.29937594903169	0.229011108916111	20963/16797/16190/14728	4
GO:0021872	forebrain generation of neurons	4/679	37/13456	0.114436324981358	0.29937594903169	0.229011108916111	15205/18186/18187/16323	4
GO:0030890	positive regulation of B cell proliferation	4/679	37/13456	0.114436324981358	0.29937594903169	0.229011108916111	12053/227059/384783/321019	4
GO:0008625	extrinsic apoptotic signaling pathway via death domain receptors	6/679	66/13456	0.114955145128397	0.300387956730461	0.229785255957905	21926/11910/79201/83925/21825/414801	6
GO:0014910	regulation of smooth muscle cell migration	6/679	66/13456	0.114955145128397	0.300387956730461	0.229785255957905	18591/19015/18792/17869/11504/13653	6
GO:0007600	sensory perception	25/679	384/13456	0.115159828209399	0.3005047461884	0.229874595410051	12576/14686/19739/77974/17869/20583/20273/13819/21926/19682/14725/17921/19225/240411/17920/20296/235380/17196/12772/216856/78286/19204/723827/387217/110789	25
GO:0021915	neural tube development	11/679	145/13456	0.115718259853469	0.3005047461884	0.229874595410051	15251/15205/18128/14725/19143/244585/231214/17684/59036/14362/140810	11
GO:0002708	positive regulation of lymphocyte mediated immunity	8/679	97/13456	0.116337644919435	0.3005047461884	0.229874595410051	14991/58185/21926/16193/16177/16176/257632/15040	8
GO:0002507	tolerance induction	3/679	24/13456	0.118173536052013	0.3005047461884	0.229874595410051	14991/171285/15040	3
GO:0003230	cardiac atrium development	3/679	24/13456	0.118173536052013	0.3005047461884	0.229874595410051	18128/12156/12168	3
GO:0006929	substrate-dependent cell migration	3/679	24/13456	0.118173536052013	0.3005047461884	0.229874595410051	18591/20583/18186	3
GO:0009156	ribonucleoside monophosphate biosynthetic process	3/679	24/13456	0.118173536052013	0.3005047461884	0.229874595410051	14450/110639/80914	3
GO:0009309	amine biosynthetic process	3/679	24/13456	0.118173536052013	0.3005047461884	0.229874595410051	20810/18263/13819	3
GO:0032816	positive regulation of natural killer cell activation	3/679	24/13456	0.118173536052013	0.3005047461884	0.229874595410051	18106/16168/15040	3
GO:0042401	cellular biogenic amine biosynthetic process	3/679	24/13456	0.118173536052013	0.3005047461884	0.229874595410051	20810/18263/13819	3
GO:0060292	long-term synaptic depression	3/679	24/13456	0.118173536052013	0.3005047461884	0.229874595410051	20620/18733/19229	3
GO:0060706	cell differentiation involved in embryonic placenta development	3/679	24/13456	0.118173536052013	0.3005047461884	0.229874595410051	19143/12142/12702	3
GO:0061050	regulation of cell growth involved in cardiac muscle cell development	3/679	24/13456	0.118173536052013	0.3005047461884	0.229874595410051	74116/19735/110196	3
GO:0072574	hepatocyte proliferation	3/679	24/13456	0.118173536052013	0.3005047461884	0.229874595410051	18792/21926/16193	3
GO:0072575	epithelial cell proliferation involved in liver morphogenesis	3/679	24/13456	0.118173536052013	0.3005047461884	0.229874595410051	18792/21926/16193	3
GO:1901099	negative regulation of signal transduction in absence of ligand	3/679	24/13456	0.118173536052013	0.3005047461884	0.229874595410051	20583/21926/16176	3
GO:1902175	regulation of oxidative stress-induced intrinsic apoptotic signaling pathway	3/679	24/13456	0.118173536052013	0.3005047461884	0.229874595410051	15251/50873/15505	3
GO:1905523	positive regulation of macrophage migration	3/679	24/13456	0.118173536052013	0.3005047461884	0.229874595410051	83433/20296/21825	3
GO:2001240	negative regulation of extrinsic apoptotic signaling pathway in absence of ligand	3/679	24/13456	0.118173536052013	0.3005047461884	0.229874595410051	20583/21926/16176	3
GO:0001933	negative regulation of protein phosphorylation	19/679	281/13456	0.119417452360407	0.3005047461884	0.229874595410051	12576/15170/83383/17295/17873/74747/50873/16193/19735/215653/16176/19260/19277/75590/319520/72828/240672/12702/235584	19
GO:0048144	fibroblast proliferation	7/679	82/13456	0.119454001837122	0.3005047461884	0.229874595410051	18591/23834/17869/14284/12571/268857/13134	7
GO:0110020	regulation of actomyosin structure organization	7/679	82/13456	0.119454001837122	0.3005047461884	0.229874595410051	17295/14026/68732/18186/11856/72754/78321	7
GO:0000097	sulfur amino acid biosynthetic process	2/679	12/13456	0.120118894776491	0.3005047461884	0.229874595410051	67873/66902	2
GO:0001781	neutrophil apoptotic process	2/679	12/13456	0.120118894776491	0.3005047461884	0.229874595410051	16193/26570	2
GO:0002328	pro-B cell differentiation	2/679	12/13456	0.120118894776491	0.3005047461884	0.229874595410051	15205/18128	2
GO:0002524	hypersensitivity	2/679	12/13456	0.120118894776491	0.3005047461884	0.229874595410051	213208/15040	2
GO:0002863	positive regulation of inflammatory response to antigenic stimulus	2/679	12/13456	0.120118894776491	0.3005047461884	0.229874595410051	21926/15040	2
GO:0002864	regulation of acute inflammatory response to antigenic stimulus	2/679	12/13456	0.120118894776491	0.3005047461884	0.229874595410051	213208/15040	2
GO:0003071	renal system process involved in regulation of systemic arterial blood pressure	2/679	12/13456	0.120118894776491	0.3005047461884	0.229874595410051	18591/19277	2
GO:0006983	ER overload response	2/679	12/13456	0.120118894776491	0.3005047461884	0.229874595410051	12122/12125	2
GO:0007214	gamma-aminobutyric acid signaling pathway	2/679	12/13456	0.120118894776491	0.3005047461884	0.229874595410051	54393/227120	2
GO:0009134	nucleoside diphosphate catabolic process	2/679	12/13456	0.120118894776491	0.3005047461884	0.229874595410051	23959/12495	2
GO:0010623	programmed cell death involved in cell development	2/679	12/13456	0.120118894776491	0.3005047461884	0.229874595410051	17311/16176	2
GO:0010935	regulation of macrophage cytokine production	2/679	12/13456	0.120118894776491	0.3005047461884	0.229874595410051	14991/24088	2
GO:0014048	regulation of glutamate secretion	2/679	12/13456	0.120118894776491	0.3005047461884	0.229874595410051	54393/16176	2
GO:0015693	magnesium ion transport	2/679	12/13456	0.120118894776491	0.3005047461884	0.229874595410051	16518/94219	2
GO:0016322	neuron remodeling	2/679	12/13456	0.120118894776491	0.3005047461884	0.229874595410051	18591/14025	2
GO:0018149	peptide cross-linking	2/679	12/13456	0.120118894776491	0.3005047461884	0.229874595410051	21817/21825	2
GO:0021756	striatum development	2/679	12/13456	0.120118894776491	0.3005047461884	0.229874595410051	26570/16323	2
GO:0031290	retinal ganglion cell axon guidance	2/679	12/13456	0.120118894776491	0.3005047461884	0.229874595410051	22339/18186	2
GO:0032352	positive regulation of hormone metabolic process	2/679	12/13456	0.120118894776491	0.3005047461884	0.229874595410051	15251/13653	2
GO:0032823	regulation of natural killer cell differentiation	2/679	12/13456	0.120118894776491	0.3005047461884	0.229874595410051	16168/12142	2
GO:0033280	response to vitamin D	2/679	12/13456	0.120118894776491	0.3005047461884	0.229874595410051	20583/20750	2
GO:0033574	response to testosterone	2/679	12/13456	0.120118894776491	0.3005047461884	0.229874595410051	20750/18821	2
GO:0035461	vitamin transmembrane transport	2/679	12/13456	0.120118894776491	0.3005047461884	0.229874595410051	14725/74152	2
GO:0035739	CD4-positive	alpha-beta T cell proliferation	2/679	12/13456	0.120118894776491	0.3005047461884	0.229874595410051	245126/14728	2
GO:0042053	regulation of dopamine metabolic process	2/679	12/13456	0.120118894776491	0.3005047461884	0.229874595410051	50873/13819	2
GO:0042403	thyroid hormone metabolic process	2/679	12/13456	0.120118894776491	0.3005047461884	0.229874595410051	72472/16522	2
GO:0042541	hemoglobin biosynthetic process	2/679	12/13456	0.120118894776491	0.3005047461884	0.229874595410051	15251/16323	2
GO:0042953	lipoprotein transport	2/679	12/13456	0.120118894776491	0.3005047461884	0.229874595410051	14725/11810	2
GO:0044764	multi-organism cellular process	2/679	12/13456	0.120118894776491	0.3005047461884	0.229874595410051	20612/233979	2
GO:0051151	negative regulation of smooth muscle cell differentiation	2/679	12/13456	0.120118894776491	0.3005047461884	0.229874595410051	18591/18569	2
GO:0051546	keratinocyte migration	2/679	12/13456	0.120118894776491	0.3005047461884	0.229874595410051	19015/212307	2
GO:0051580	regulation of neurotransmitter uptake	2/679	12/13456	0.120118894776491	0.3005047461884	0.229874595410051	50873/269642	2
GO:0055091	phospholipid homeostasis	2/679	12/13456	0.120118894776491	0.3005047461884	0.229874595410051	11303/11307	2
GO:0071636	positive regulation of transforming growth factor beta production	2/679	12/13456	0.120118894776491	0.3005047461884	0.229874595410051	19225/21825	2
GO:0071696	ectodermal placode development	2/679	12/13456	0.120118894776491	0.3005047461884	0.229874595410051	21385/18186	2
GO:0071731	response to nitric oxide	2/679	12/13456	0.120118894776491	0.3005047461884	0.229874595410051	12927/21825	2
GO:0072683	T cell extravasation	2/679	12/13456	0.120118894776491	0.3005047461884	0.229874595410051	20296/12772	2
GO:0090280	positive regulation of calcium ion import	2/679	12/13456	0.120118894776491	0.3005047461884	0.229874595410051	18591/20293	2
GO:0097107	postsynaptic density assembly	2/679	12/13456	0.120118894776491	0.3005047461884	0.229874595410051	217692/216856	2
GO:0097186	amelogenesis	2/679	12/13456	0.120118894776491	0.3005047461884	0.229874595410051	80752/58235	2
GO:0098712	L-glutamate import across plasma membrane	2/679	12/13456	0.120118894776491	0.3005047461884	0.229874595410051	21926/26570	2
GO:0106070	regulation of adenylate cyclase-activating G protein-coupled receptor signaling pathway	2/679	12/13456	0.120118894776491	0.3005047461884	0.229874595410051	18578/105171	2
GO:1900044	regulation of protein K63-linked ubiquitination	2/679	12/13456	0.120118894776491	0.3005047461884	0.229874595410051	19260/257632	2
GO:1900424	regulation of defense response to bacterium	2/679	12/13456	0.120118894776491	0.3005047461884	0.229874595410051	171285/257632	2
GO:1901077	regulation of relaxation of muscle	2/679	12/13456	0.120118894776491	0.3005047461884	0.229874595410051	18578/18821	2
GO:1902857	positive regulation of non-motile cilium assembly	2/679	12/13456	0.120118894776491	0.3005047461884	0.229874595410051	53860/140810	2
GO:1902931	negative regulation of alcohol biosynthetic process	2/679	12/13456	0.120118894776491	0.3005047461884	0.229874595410051	56193/12156	2
GO:1905063	regulation of vascular associated smooth muscle cell differentiation	2/679	12/13456	0.120118894776491	0.3005047461884	0.229874595410051	18591/18569	2
GO:1990403	embryonic brain development	2/679	12/13456	0.120118894776491	0.3005047461884	0.229874595410051	231214/140810	2
GO:2000725	regulation of cardiac muscle cell differentiation	2/679	12/13456	0.120118894776491	0.3005047461884	0.229874595410051	12156/211323	2
GO:2000811	negative regulation of anoikis	2/679	12/13456	0.120118894776491	0.3005047461884	0.229874595410051	20583/18128	2
GO:2001044	regulation of integrin-mediated signaling pathway	2/679	12/13456	0.120118894776491	0.3005047461884	0.229874595410051	16950/68891	2
GO:2001279	regulation of unsaturated fatty acid biosynthetic process	2/679	12/13456	0.120118894776491	0.3005047461884	0.229874595410051	16176/19225	2
GO:0008544	epidermis development	14/679	196/13456	0.120345000894099	0.3005047461884	0.229874595410051	19015/18612/18755/15205/21926/18128/14284/17921/19143/19225/17920/56338/83925/16323	14
GO:0002712	regulation of B cell mediated immunity	5/679	52/13456	0.120413149615035	0.3005047461884	0.229874595410051	15170/12053/21926/257632/15040	5
GO:0002889	regulation of immunoglobulin mediated immune response	5/679	52/13456	0.120413149615035	0.3005047461884	0.229874595410051	15170/12053/21926/257632/15040	5
GO:0042490	mechanoreceptor differentiation	5/679	52/13456	0.120413149615035	0.3005047461884	0.229874595410051	15205/18128/17921/17920/110789	5
GO:0046173	polyol biosynthetic process	5/679	52/13456	0.120413149615035	0.3005047461884	0.229874595410051	18106/56193/13849/19204/19229	5
GO:0060395	SMAD protein signal transduction	5/679	52/13456	0.120413149615035	0.3005047461884	0.229874595410051	76901/14281/12156/22057/16323	5
GO:0140353	lipid export from cell	5/679	52/13456	0.120413149615035	0.3005047461884	0.229874595410051	54393/16176/20750/17920/16323	5
GO:0010563	negative regulation of phosphorus metabolic process	26/679	404/13456	0.120929863670895	0.30146371272175	0.230608167996381	18591/12576/15170/83383/17295/17873/11622/74747/56193/50873/21926/16193/19735/215653/16176/19260/19277/75590/319520/72828/240672/107895/384783/12495/12702/235584	26
GO:0045936	negative regulation of phosphate metabolic process	26/679	404/13456	0.120929863670895	0.30146371272175	0.230608167996381	18591/12576/15170/83383/17295/17873/11622/74747/56193/50873/21926/16193/19735/215653/16176/19260/19277/75590/319520/72828/240672/107895/384783/12495/12702/235584	26
GO:0060047	heart contraction	10/679	130/13456	0.121175403311334	0.301520918767654	0.230651928425539	17295/20112/13819/21926/19735/18578/68667/17201/18821/16518	10
GO:0010522	regulation of calcium ion transport into cytosol	6/679	67/13456	0.121217768309492	0.301520918767654	0.230651928425539	15170/72828/15945/18821/12766/19229	6
GO:0035773	insulin secretion involved in cellular response to glucose stimulus	6/679	67/13456	0.121217768309492	0.301520918767654	0.230651928425539	19015/15251/50873/18576/68667/667118	6
GO:0048565	digestive tract development	6/679	67/13456	0.121217768309492	0.301520918767654	0.230651928425539	21385/15251/15205/18128/12142/59036	6
GO:0010565	regulation of cellular ketone metabolic process	8/679	98/13456	0.12144174233861	0.3017482593479	0.230825835242543	19015/14933/12156/16176/26570/19225/13653/384783	8
GO:0043123	positive regulation of I-kappaB kinase/NF-kappaB signaling	8/679	98/13456	0.12144174233861	0.3017482593479	0.230825835242543	56620/50873/21926/16176/217203/21817/107607/257632	8
GO:0050829	defense response to Gram-negative bacterium	4/679	38/13456	0.123095098296637	0.304692162831045	0.233077808400031	78416/21425/257630/17476	4
GO:0051289	protein homotetramerization	4/679	38/13456	0.123095098296637	0.304692162831045	0.233077808400031	14026/70461/68667/16518	4
GO:0060389	pathway-restricted SMAD protein phosphorylation	4/679	38/13456	0.123095098296637	0.304692162831045	0.233077808400031	15216/12156/16323/12168	4
GO:0062208	positive regulation of pattern recognition receptor signaling pathway	4/679	38/13456	0.123095098296637	0.304692162831045	0.233077808400031	58185/71398/19260/24088	4
GO:0071622	regulation of granulocyte chemotaxis	4/679	38/13456	0.123095098296637	0.304692162831045	0.233077808400031	16176/20296/21825/257632	4
GO:0140115	export across plasma membrane	4/679	38/13456	0.123095098296637	0.304692162831045	0.233077808400031	11303/19739/53945/16534	4
GO:1903432	regulation of TORC1 signaling	4/679	38/13456	0.123095098296637	0.304692162831045	0.233077808400031	71962/75747/70713/68441	4
GO:0030100	regulation of endocytosis	13/679	180/13456	0.123181087047913	0.304739297957664	0.233113864962527	15216/20963/12759/22339/83433/14725/98878/73094/233489/215114/12475/68891/227333	13
GO:0071375	cellular response to peptide hormone stimulus	14/679	197/13456	0.123921419061194	0.306404290910677	0.234387520657783	16956/14245/15370/64898/19262/16176/29815/18576/12927/75747/235442/384783/12702/12096	14
GO:0032479	regulation of type I interferon production	7/679	83/13456	0.125148373689113	0.309102223023789	0.236451335159258	171285/20963/54123/19260/24088/268857/12475	7
GO:0043200	response to amino acid	7/679	83/13456	0.125148373689113	0.309102223023789	0.236451335159258	71962/50873/21926/75747/723827/68441/387174	7
GO:0009749	response to glucose	10/679	131/13456	0.125648420993184	0.310168987180572	0.237267368789505	19015/15251/50873/18576/68667/13653/384783/21825/18111/667118	10
GO:0007050	cell cycle arrest	9/679	115/13456	0.126652765664138	0.312333164530625	0.23892288138639	12576/83383/17869/18128/11787/28019/21825/16323/12443	9
GO:0006865	amino acid transport	8/679	99/13456	0.126662350993746	0.312333164530625	0.23892288138639	17869/21926/54393/19735/16176/26570/208638/17920	8
GO:0032409	regulation of transporter activity	13/679	181/13456	0.126981004587602	0.312949395172042	0.239394274171935	26556/19739/83433/18578/20296/100503659/57780/18821/279561/12856/216856/19204/19229	13
GO:0006939	smooth muscle contraction	6/679	68/13456	0.127645263673818	0.314253437674484	0.240391816628248	21385/107589/19735/19225/233979/19204	6
GO:0021761	limbic system development	5/679	53/13456	0.127786272657177	0.314253437674484	0.240391816628248	12032/12227/18186/18187/231380	5
GO:0032526	response to retinoic acid	5/679	53/13456	0.127786272657177	0.314253437674484	0.240391816628248	22612/11303/16004/19229/243866	5
GO:1902373	negative regulation of mRNA catabolic process	5/679	53/13456	0.127786272657177	0.314253437674484	0.240391816628248	53422/22339/15572/22057/11810	5
GO:0001953	negative regulation of cell-matrix adhesion	3/679	25/13456	0.129522747739067	0.315287458667503	0.241182802995121	12053/11856/21825	3
GO:0002483	antigen processing and presentation of endogenous peptide antigen	3/679	25/13456	0.129522747739067	0.315287458667503	0.241182802995121	15216/14991/15040	3
GO:0007595	lactation	3/679	25/13456	0.129522747739067	0.315287458667503	0.241182802995121	15251/22339/12443	3
GO:0008045	motor neuron axon guidance	3/679	25/13456	0.129522747739067	0.315287458667503	0.241182802995121	18612/18186/16782	3
GO:0010518	positive regulation of phospholipase activity	3/679	25/13456	0.129522747739067	0.315287458667503	0.241182802995121	11856/19204/11727	3
GO:0010758	regulation of macrophage chemotaxis	3/679	25/13456	0.129522747739067	0.315287458667503	0.241182802995121	20296/21825/19229	3
GO:0010874	regulation of cholesterol efflux	3/679	25/13456	0.129522747739067	0.315287458667503	0.241182802995121	11303/11307/69863	3
GO:0019885	antigen processing and presentation of endogenous peptide antigen via MHC class I	3/679	25/13456	0.129522747739067	0.315287458667503	0.241182802995121	15216/14991/15040	3
GO:0030513	positive regulation of BMP signaling pathway	3/679	25/13456	0.129522747739067	0.315287458667503	0.241182802995121	15205/18128/12168	3
GO:0031116	positive regulation of microtubule polymerization	3/679	25/13456	0.129522747739067	0.315287458667503	0.241182802995121	12576/17295/17755	3
GO:0033233	regulation of protein sumoylation	3/679	25/13456	0.129522747739067	0.315287458667503	0.241182802995121	11624/13653/30877	3
GO:0040020	regulation of meiotic nuclear division	3/679	25/13456	0.129522747739067	0.315287458667503	0.241182802995121	20112/18413/243866	3
GO:0045589	regulation of regulatory T cell differentiation	3/679	25/13456	0.129522747739067	0.315287458667503	0.241182802995121	14991/12053/13024	3
GO:0045616	regulation of keratinocyte differentiation	3/679	25/13456	0.129522747739067	0.315287458667503	0.241182802995121	18612/18755/18128	3
GO:0046677	response to antibiotic	3/679	25/13456	0.129522747739067	0.315287458667503	0.241182802995121	12576/15251/15901	3
GO:0061082	myeloid leukocyte cytokine production	3/679	25/13456	0.129522747739067	0.315287458667503	0.241182802995121	14991/12053/24088	3
GO:0090200	positive regulation of release of cytochrome c from mitochondria	3/679	25/13456	0.129522747739067	0.315287458667503	0.241182802995121	12122/12124/12125	3
GO:0150076	neuroinflammatory response	3/679	25/13456	0.129522747739067	0.315287458667503	0.241182802995121	57781/83433/19225	3
GO:2000406	positive regulation of T cell migration	3/679	25/13456	0.129522747739067	0.315287458667503	0.241182802995121	15945/12772/76088	3
GO:0098656	anion transmembrane transport	20/679	302/13456	0.130184460520249	0.316728842484325	0.242285406284837	117591/17295/22612/11303/17869/21926/19735/14725/269346/20515/16176/26570/20912/74152/208638/384783/21825/22117/19204/381417	20
GO:0008016	regulation of heart contraction	8/679	100/13456	0.131997963568253	0.32034610691247	0.245052474717059	13819/21926/19735/18578/68667/17201/18821/16518	8
GO:0001774	microglial cell activation	4/679	39/13456	0.132023131934928	0.32034610691247	0.245052474717059	12759/83433/21926/24088	4
GO:0010718	positive regulation of epithelial to mesenchymal transition	4/679	39/13456	0.132023131934928	0.32034610691247	0.245052474717059	16193/18128/12156/16176	4
GO:0034308	primary alcohol metabolic process	4/679	39/13456	0.132023131934928	0.32034610691247	0.245052474717059	77974/12156/242864/20148	4
GO:0046622	positive regulation of organ growth	4/679	39/13456	0.132023131934928	0.32034610691247	0.245052474717059	21385/18128/19374/110196	4
GO:0009746	response to hexose	10/679	133/13456	0.134860110839775	0.326203596326279	0.249533229268183	19015/15251/50873/18576/68667/13653/384783/21825/18111/667118	10
GO:0034284	response to monosaccharide	10/679	133/13456	0.134860110839775	0.326203596326279	0.249533229268183	19015/15251/50873/18576/68667/13653/384783/21825/18111/667118	10
GO:0032481	positive regulation of type I interferon production	5/679	54/13456	0.135360241947911	0.326203596326279	0.249533229268183	20963/54123/19260/24088/12475	5
GO:0046486	glycerolipid metabolic process	20/679	304/13456	0.136235999957893	0.326203596326279	0.249533229268183	18591/16956/56193/14245/110197/230779/17691/64898/18719/14933/99010/26970/231510/18705/71795/11810/242864/12702/227333/11727	20
GO:0007173	epidermal growth factor receptor signaling pathway	7/679	85/13456	0.136940601847822	0.326203596326279	0.249533229268183	215653/29815/11839/12927/215114/19229/227333	7
GO:0036473	cell death in response to oxidative stress	7/679	85/13456	0.136940601847822	0.326203596326279	0.249533229268183	17295/15251/50873/21926/26570/15505/14362	7
GO:0045017	glycerolipid biosynthetic process	11/679	150/13456	0.136970302906464	0.326203596326279	0.249533229268183	18591/16956/14245/110197/17691/64898/18719/231510/18705/227333/11727	11
GO:0001886	endothelial cell morphogenesis	2/679	13/13456	0.137406669648829	0.326203596326279	0.249533229268183	17295/15901	2
GO:0002076	osteoblast development	2/679	13/13456	0.137406669648829	0.326203596326279	0.249533229268183	23845/12393	2
GO:0002371	dendritic cell cytokine production	2/679	13/13456	0.137406669648829	0.326203596326279	0.249533229268183	24088/257632	2
GO:0002730	regulation of dendritic cell cytokine production	2/679	13/13456	0.137406669648829	0.326203596326279	0.249533229268183	24088/257632	2
GO:0003094	glomerular filtration	2/679	13/13456	0.137406669648829	0.326203596326279	0.249533229268183	18591/19277	2
GO:0006596	polyamine biosynthetic process	2/679	13/13456	0.137406669648829	0.326203596326279	0.249533229268183	20810/18263	2
GO:0006706	steroid catabolic process	2/679	13/13456	0.137406669648829	0.326203596326279	0.249533229268183	78925/20750	2
GO:0009886	post-embryonic animal morphogenesis	2/679	13/13456	0.137406669648829	0.326203596326279	0.249533229268183	12125/17921	2
GO:0010421	hydrogen peroxide-mediated programmed cell death	2/679	13/13456	0.137406669648829	0.326203596326279	0.249533229268183	17295/15505	2
GO:0021544	subpallium development	2/679	13/13456	0.137406669648829	0.326203596326279	0.249533229268183	26570/16323	2
GO:0021871	forebrain regionalization	2/679	13/13456	0.137406669648829	0.326203596326279	0.249533229268183	12156/242620	2
GO:0030213	hyaluronan biosynthetic process	2/679	13/13456	0.137406669648829	0.326203596326279	0.249533229268183	18591/16176	2
GO:0032717	negative regulation of interleukin-8 production	2/679	13/13456	0.137406669648829	0.326203596326279	0.249533229268183	19260/12051	2
GO:0032793	positive regulation of CREB transcription factor activity	2/679	13/13456	0.137406669648829	0.326203596326279	0.249533229268183	22339/70461	2
GO:0033169	histone H3-K9 demethylation	2/679	13/13456	0.137406669648829	0.326203596326279	0.249533229268183	338523/104263	2
GO:0040037	negative regulation of fibroblast growth factor receptor signaling pathway	2/679	13/13456	0.137406669648829	0.326203596326279	0.249533229268183	14733/21825	2
GO:0042402	cellular biogenic amine catabolic process	2/679	13/13456	0.137406669648829	0.326203596326279	0.249533229268183	266645/330817	2
GO:0043567	regulation of insulin-like growth factor receptor signaling pathway	2/679	13/13456	0.137406669648829	0.326203596326279	0.249533229268183	16012/12156	2
GO:0044872	lipoprotein localization	2/679	13/13456	0.137406669648829	0.326203596326279	0.249533229268183	14725/11810	2
GO:0045655	regulation of monocyte differentiation	2/679	13/13456	0.137406669648829	0.326203596326279	0.249533229268183	17869/12571	2
GO:0046184	aldehyde biosynthetic process	2/679	13/13456	0.137406669648829	0.326203596326279	0.249533229268183	12156/104263	2
GO:0048532	anatomical structure arrangement	2/679	13/13456	0.137406669648829	0.326203596326279	0.249533229268183	18186/18187	2
GO:0051602	response to electrical stimulus	2/679	13/13456	0.137406669648829	0.326203596326279	0.249533229268183	67731/17920	2
GO:0051938	L-glutamate import	2/679	13/13456	0.137406669648829	0.326203596326279	0.249533229268183	21926/26570	2
GO:0060037	pharyngeal system development	2/679	13/13456	0.137406669648829	0.326203596326279	0.249533229268183	15205/12168	2
GO:0060213	positive regulation of nuclear-transcribed mRNA poly(A) tail shortening	2/679	13/13456	0.137406669648829	0.326203596326279	0.249533229268183	12227/22057	2
GO:0060253	negative regulation of glial cell proliferation	2/679	13/13456	0.137406669648829	0.326203596326279	0.249533229268183	15205/18128	2
GO:0060707	trophoblast giant cell differentiation	2/679	13/13456	0.137406669648829	0.326203596326279	0.249533229268183	12142/12702	2
GO:0072672	neutrophil extravasation	2/679	13/13456	0.137406669648829	0.326203596326279	0.249533229268183	16177/68891	2
GO:0097421	liver regeneration	2/679	13/13456	0.137406669648829	0.326203596326279	0.249533229268183	16193/12443	2
GO:0097468	programmed cell death in response to reactive oxygen species	2/679	13/13456	0.137406669648829	0.326203596326279	0.249533229268183	17295/15505	2
GO:0099527	postsynapse to nucleus signaling pathway	2/679	13/13456	0.137406669648829	0.326203596326279	0.249533229268183	77531/211323	2
GO:1902165	regulation of intrinsic apoptotic signaling pathway in response to DNA damage by p53 class mediator	2/679	13/13456	0.137406669648829	0.326203596326279	0.249533229268183	29813/68428	2
GO:1905606	regulation of presynapse assembly	2/679	13/13456	0.137406669648829	0.326203596326279	0.249533229268183	14362/216856	2
GO:0060402	calcium ion transport into cytosol	8/679	101/13456	0.137446945903735	0.326203596326279	0.249533229268183	15170/20190/72828/15945/18821/233979/12766/19229	8
GO:0032956	regulation of actin cytoskeleton organization	19/679	287/13456	0.137733195856155	0.326712614662436	0.249922608755744	15162/17295/69288/56193/14026/68732/50873/18186/24088/21916/11856/260409/101497/12985/72754/15901/19229/78321/99889	19
GO:0002831	regulation of response to biotic stimulus	16/679	235/13456	0.137834230520369	0.326781988192041	0.249975676842862	14991/171285/17079/83433/71398/54123/16176/19260/24088/16168/107607/12142/257630/268857/257632/15040	16
GO:0051099	positive regulation of binding	12/679	167/13456	0.138203934281308	0.327487927562996	0.250515693362869	15216/17295/16364/20620/17869/15205/50873/12156/72701/12985/227120/59036	12
GO:0016042	lipid catabolic process	15/679	218/13456	0.138488919914676	0.327992488788555	0.250901663331917	19015/85031/16956/14245/78925/64898/21926/16889/16176/26970/20750/70461/18576/384783/242864	15
GO:0042593	glucose homeostasis	13/679	184/13456	0.138772895463498	0.328494134243289	0.25128540284821	19015/17295/15251/50873/14933/16193/20912/18576/75747/68667/235380/330817/667118	13
GO:0001942	hair follicle development	6/679	70/13456	0.140980636664802	0.330208100660939	0.252596521363978	19015/21926/18128/19225/83925/16323	6
GO:0014909	smooth muscle cell migration	6/679	70/13456	0.140980636664802	0.330208100660939	0.252596521363978	18591/19015/18792/17869/11504/13653	6
GO:0043506	regulation of JUN kinase activity	6/679	70/13456	0.140980636664802	0.330208100660939	0.252596521363978	20963/21926/16176/19260/19229/330177	6
GO:0072332	intrinsic apoptotic signaling pathway by p53 class mediator	6/679	70/13456	0.140980636664802	0.330208100660939	0.252596521363978	29813/74747/50873/68428/209456/12051	6
GO:0001736	establishment of planar polarity	4/679	40/13456	0.141208574905591	0.330208100660939	0.252596521363978	244585/73692/59036/14362	4
GO:0003170	heart valve development	4/679	40/13456	0.141208574905591	0.330208100660939	0.252596521363978	18128/12156/12142/12168	4
GO:0007164	establishment of tissue polarity	4/679	40/13456	0.141208574905591	0.330208100660939	0.252596521363978	244585/73692/59036/14362	4
GO:0033173	calcineurin-NFAT signaling cascade	4/679	40/13456	0.141208574905591	0.330208100660939	0.252596521363978	54446/21926/211323/100504518	4
GO:0042771	intrinsic apoptotic signaling pathway in response to DNA damage by p53 class mediator	4/679	40/13456	0.141208574905591	0.330208100660939	0.252596521363978	29813/74747/68428/12051	4
GO:0097035	regulation of membrane lipid distribution	4/679	40/13456	0.141208574905591	0.330208100660939	0.252596521363978	11303/11981/235527/16534	4
GO:0001706	endoderm formation	3/679	26/13456	0.141237955181645	0.330208100660939	0.252596521363978	319520/240672/16323	3
GO:0002686	negative regulation of leukocyte migration	3/679	26/13456	0.141237955181645	0.330208100660939	0.252596521363978	109934/57781/20293	3
GO:0010714	positive regulation of collagen metabolic process	3/679	26/13456	0.141237955181645	0.330208100660939	0.252596521363978	18591/20296/210719	3
GO:0031279	regulation of cyclase activity	3/679	26/13456	0.141237955181645	0.330208100660939	0.252596521363978	54393/74191/110789	3
GO:0032232	negative regulation of actin filament bundle assembly	3/679	26/13456	0.141237955181645	0.330208100660939	0.252596521363978	17295/50873/11856	3
GO:0042311	vasodilation	3/679	26/13456	0.141237955181645	0.330208100660939	0.252596521363978	21926/19735/16598	3
GO:0043276	anoikis	3/679	26/13456	0.141237955181645	0.330208100660939	0.252596521363978	20583/17691/18128	3
GO:0048013	ephrin receptor signaling pathway	3/679	26/13456	0.141237955181645	0.330208100660939	0.252596521363978	18128/217692/77531	3
GO:0060142	regulation of syncytium formation by plasma membrane fusion	3/679	26/13456	0.141237955181645	0.330208100660939	0.252596521363978	83433/16190/15945	3
GO:0072576	liver morphogenesis	3/679	26/13456	0.141237955181645	0.330208100660939	0.252596521363978	18792/21926/16193	3
GO:0090218	positive regulation of lipid kinase activity	3/679	26/13456	0.141237955181645	0.330208100660939	0.252596521363978	18591/257632/19229	3
GO:1902253	regulation of intrinsic apoptotic signaling pathway by p53 class mediator	3/679	26/13456	0.141237955181645	0.330208100660939	0.252596521363978	29813/50873/68428	3
GO:1903579	negative regulation of ATP metabolic process	3/679	26/13456	0.141237955181645	0.330208100660939	0.252596521363978	74747/21926/12495	3
GO:2000272	negative regulation of signaling receptor activity	3/679	26/13456	0.141237955181645	0.330208100660939	0.252596521363978	15216/21926/14727	3
GO:0032271	regulation of protein polymerization	13/679	185/13456	0.14283271710783	0.333089002342504	0.254800300561697	12576/17295/14026/68732/72948/24088/21916/260409/101497/12985/17755/19229/99889	13
GO:0033500	carbohydrate homeostasis	13/679	185/13456	0.14283271710783	0.333089002342504	0.254800300561697	19015/17295/15251/50873/14933/16193/20912/18576/75747/68667/235380/330817/667118	13
GO:0006941	striated muscle contraction	8/679	102/13456	0.143007540856832	0.333089002342504	0.254800300561697	26556/17295/19735/18578/68667/18821/16518/21957	8
GO:0031099	regeneration	8/679	102/13456	0.143007540856832	0.333089002342504	0.254800300561697	19015/12576/380684/18792/16193/21682/22241/12443	8
GO:0032092	positive regulation of protein binding	7/679	86/13456	0.143033610119833	0.333089002342504	0.254800300561697	15216/20620/50873/12156/12985/227120/59036	7
GO:0062207	regulation of pattern recognition receptor signaling pathway	7/679	86/13456	0.143033610119833	0.333089002342504	0.254800300561697	58185/16364/71398/54123/19260/24088/257632	7
GO:0150115	cell-substrate junction organization	7/679	86/13456	0.143033610119833	0.333089002342504	0.254800300561697	22339/212307/18186/19262/11856/235442/19229	7
GO:0001885	endothelial cell development	5/679	55/13456	0.143128754082148	0.333089002342504	0.254800300561697	17295/22339/21926/16176/15901	5
GO:0022600	digestive system process	5/679	55/13456	0.143128754082148	0.333089002342504	0.254800300561697	19216/279561/17386/16534/257632	5
GO:1902904	negative regulation of supramolecular fiber organization	10/679	135/13456	0.144419947128357	0.335922125359367	0.256967530914991	17295/14026/68732/12759/50873/24088/21916/11856/17755/140810	10
GO:0042594	response to starvation	11/679	152/13456	0.146020305476281	0.339471108543427	0.259682366816589	57875/29869/15216/58809/21425/17691/11910/22241/75747/52639/68441	11
GO:0006897	endocytosis	26/679	414/13456	0.146935017913622	0.341423277969785	0.26117570149016	15216/11303/69288/68732/20963/12759/22339/83433/14725/98878/20612/11981/73094/22241/17920/544817/233489/215114/21825/194590/241576/233979/12475/216856/68891/227333	26
GO:0043473	pigmentation	6/679	71/13456	0.147880822167105	0.343270526519461	0.262588775720649	17311/17869/20583/12125/17921/17342	6
GO:1904035	regulation of epithelial cell apoptotic process	6/679	71/13456	0.147880822167105	0.343270526519461	0.262588775720649	57875/14991/21926/18569/20293/21825	6
GO:0030516	regulation of axon extension	7/679	87/13456	0.149254380162154	0.346276348290615	0.264888113991618	22339/11302/18186/171207/17755/211323/12168	7
GO:0003015	heart process	10/679	136/13456	0.149327871637627	0.346276348290615	0.264888113991618	17295/20112/13819/21926/19735/18578/68667/17201/18821/16518	10
GO:0042326	negative regulation of phosphorylation	21/679	326/13456	0.149914762300291	0.347460284109433	0.265793779445473	12576/15170/83383/17295/17873/74747/50873/21926/16193/19735/215653/16176/19260/19277/75590/319520/72828/240672/384783/12702/235584	21
GO:0015909	long-chain fatty acid transport	4/679	41/13456	0.150639164350159	0.348123766269049	0.266301317828604	20963/26970/384783/21825	4
GO:0032007	negative regulation of TOR signaling	4/679	41/13456	0.150639164350159	0.348123766269049	0.266301317828604	74747/71962/15251/75747	4
GO:0045599	negative regulation of fat cell differentiation	4/679	41/13456	0.150639164350159	0.348123766269049	0.266301317828604	22339/21926/19883/81703	4
GO:0048016	inositol phosphate-mediated signaling	4/679	41/13456	0.150639164350159	0.348123766269049	0.266301317828604	54446/21926/211323/100504518	4
GO:0051055	negative regulation of lipid biosynthetic process	4/679	41/13456	0.150639164350159	0.348123766269049	0.266301317828604	18591/20583/17691/12156	4
GO:0031032	actomyosin structure organization	11/679	153/13456	0.150659890059321	0.348123766269049	0.266301317828604	17295/14026/68732/18186/226751/21916/11856/72754/19229/21957/78321	11
GO:0035050	embryonic heart tube development	5/679	56/13456	0.151085201532345	0.348683906391083	0.266729803519957	21385/15251/15205/18128/17684	5
GO:0051262	protein tetramerization	5/679	56/13456	0.151085201532345	0.348683906391083	0.266729803519957	26556/14026/70461/68667/16518	5
GO:0003009	skeletal muscle contraction	3/679	27/13456	0.153290603632839	0.348683906391083	0.266729803519957	26556/16518/21957	3
GO:0010464	regulation of mesenchymal cell proliferation	3/679	27/13456	0.153290603632839	0.348683906391083	0.266729803519957	17869/22339/384783	3
GO:0019883	antigen processing and presentation of endogenous antigen	3/679	27/13456	0.153290603632839	0.348683906391083	0.266729803519957	15216/14991/15040	3
GO:0030850	prostate gland development	3/679	27/13456	0.153290603632839	0.348683906391083	0.266729803519957	12576/11622/18128	3
GO:0031112	positive regulation of microtubule polymerization or depolymerization	3/679	27/13456	0.153290603632839	0.348683906391083	0.266729803519957	12576/17295/17755	3
GO:0033598	mammary gland epithelial cell proliferation	3/679	27/13456	0.153290603632839	0.348683906391083	0.266729803519957	18612/11839/12443	3
GO:0045066	regulatory T cell differentiation	3/679	27/13456	0.153290603632839	0.348683906391083	0.266729803519957	14991/12053/13024	3
GO:0045746	negative regulation of Notch signaling pathway	3/679	27/13456	0.153290603632839	0.348683906391083	0.266729803519957	12053/69068/67122	3
GO:0045933	positive regulation of muscle contraction	3/679	27/13456	0.153290603632839	0.348683906391083	0.266729803519957	19735/19225/19204	3
GO:0046717	acid secretion	3/679	27/13456	0.153290603632839	0.348683906391083	0.266729803519957	17869/21926/54393	3
GO:0048546	digestive tract morphogenesis	3/679	27/13456	0.153290603632839	0.348683906391083	0.266729803519957	15251/18128/59036	3
GO:0060674	placenta blood vessel development	3/679	27/13456	0.153290603632839	0.348683906391083	0.266729803519957	15205/226841/12702	3
GO:0090162	establishment of epithelial cell polarity	3/679	27/13456	0.153290603632839	0.348683906391083	0.266729803519957	19157/15205/232288	3
GO:1903170	negative regulation of calcium ion transmembrane transport	3/679	27/13456	0.153290603632839	0.348683906391083	0.266729803519957	11622/100503659/18821	3
GO:0010717	regulation of epithelial to mesenchymal transition	6/679	72/13456	0.154930523014361	0.348683906391083	0.266729803519957	22339/16193/18128/12156/16176/629378	6
GO:0021549	cerebellum development	6/679	72/13456	0.154930523014361	0.348683906391083	0.266729803519957	22241/19883/244585/73692/78286/140810	6
GO:0043525	positive regulation of neuron apoptotic process	6/679	72/13456	0.154930523014361	0.348683906391083	0.266729803519957	20302/17865/21926/12125/16176/13653	6
GO:0140029	exocytic process	6/679	72/13456	0.154930523014361	0.348683906391083	0.266729803519957	56193/20963/20912/235442/74732/27062	6
GO:0001946	lymphangiogenesis	2/679	14/13456	0.155191914399898	0.348683906391083	0.266729803519957	22339/12168	2
GO:0003177	pulmonary valve development	2/679	14/13456	0.155191914399898	0.348683906391083	0.266729803519957	18128/12168	2
GO:0006144	purine nucleobase metabolic process	2/679	14/13456	0.155191914399898	0.348683906391083	0.266729803519957	14450/99586	2
GO:0009310	amine catabolic process	2/679	14/13456	0.155191914399898	0.348683906391083	0.266729803519957	266645/330817	2
GO:0010544	negative regulation of platelet activation	2/679	14/13456	0.155191914399898	0.348683906391083	0.266729803519957	18591/72828	2
GO:0010934	macrophage cytokine production	2/679	14/13456	0.155191914399898	0.348683906391083	0.266729803519957	14991/24088	2
GO:0014808	release of sequestered calcium ion into cytosol by sarcoplasmic reticulum	2/679	14/13456	0.155191914399898	0.348683906391083	0.266729803519957	20190/18821	2
GO:0019886	antigen processing and presentation of exogenous peptide antigen via MHC class II	2/679	14/13456	0.155191914399898	0.348683906391083	0.266729803519957	13034/15001	2
GO:0019934	cGMP-mediated signaling	2/679	14/13456	0.155191914399898	0.348683906391083	0.266729803519957	21825/19229	2
[truncated: 2,553 more rows]
[truncated: 1 more columns]
