# Supplementary material for: Whole-Transcriptome Analysis Highlights Adenylyl Cyclase Toxins-Derived Modulation of NF-κB and ERK1/2 Pathways in Macrophages
Source: Toxins (Basel). 2023 Feb 9;15(2):139. doi: 10.3390/toxins15020139 (PMC9967024; doi:10.3390/toxins15020139)
Supplement: Supplementary file 1 [file toxins-15-00139-s001.zip › Supplemental Table 2.csv]

ID	Description	GeneRatio	BgRatio	pvalue	p.adjust	qvalue	geneID	Count
GO:0042254	ribosome biogenesis	127/3078	286/13456	3.44E-16	1.88E-12	1.59E-12	100609/52530/67223/66942/103136/67619/235036/14791/70683/52513/66409/67493/19211/234344/215193/66596/50912/228889/68979/12261/56321/353258/56200/217011/56095/69237/208366/66254/67832/224092/12181/67014/53414/57315/67222/59028/18572/69499/18813/66446/28126/75619/73674/57750/55989/27993/22596/67949/14645/227674/66181/98956/271842/67134/69639/97112/68147/70285/66362/230082/69072/69902/230737/67205/7…	127
GO:0006364	rRNA processing	92/3078	203/13456	1.01E-12	2.77E-09	2.34E-09	100609/52530/67223/66942/67619/14791/70683/52513/66409/67493/234344/215193/50912/228889/68979/56200/56095/69237/208366/66254/12181/53414/57315/67222/59028/18572/69499/18813/66446/73674/57750/27993/67949/66181/98956/271842/69639/68147/70285/66362/230082/69072/69902/67205/74035/208144/69663/213895/67973/101867/245474/67920/102462/110816/72662/269470/66583/215194/107094/72171/216987/75416/110109/225…	92
GO:0016072	rRNA metabolic process	92/3078	212/13456	2.04E-11	3.51E-08	2.96E-08	100609/52530/67223/66942/67619/14791/70683/52513/66409/67493/234344/215193/50912/228889/68979/56200/56095/69237/208366/66254/12181/53414/57315/67222/59028/18572/69499/18813/66446/73674/57750/27993/67949/66181/98956/271842/69639/68147/70285/66362/230082/69072/69902/67205/74035/208144/69663/213895/67973/101867/245474/67920/102462/110816/72662/269470/66583/215194/107094/72171/216987/75416/110109/225…	92
GO:0034660	ncRNA metabolic process	157/3078	426/13456	2.57E-11	3.51E-08	2.96E-08	100609/52530/67223/66942/212528/60507/67619/108943/14791/70683/52513/66409/68916/17299/22321/67493/234344/66637/215193/50912/228889/68979/104458/244141/73681/56200/71701/71916/52686/56095/69237/22375/208366/28114/66254/110960/67724/12181/106248/70120/67053/53414/57773/72167/240174/57315/107045/67222/70223/59028/18572/72133/69499/18813/16193/66446/73674/57750/27993/23874/226414/67949/107508/66181/…	157
GO:0022613	ribonucleoprotein complex biogenesis	148/3078	397/13456	3.66E-11	4.00E-08	3.38E-08	100609/52530/67223/66942/103136/67619/20174/235036/14791/70683/52513/66409/67493/19211/234344/215193/66596/50912/228889/68979/12261/56321/353258/56200/20222/217011/56095/69237/15519/208366/66254/27275/67832/224092/12181/67014/68184/27374/53414/57315/67222/28000/59028/13669/18572/69499/18813/66446/28126/75619/73674/57750/55989/27993/22596/67949/14645/227674/66181/98956/271842/67134/69639/97112/681…	148
GO:0034470	ncRNA processing	130/3078	348/13456	4.95E-10	4.51E-07	3.81E-07	100609/52530/67223/66942/212528/60507/67619/108943/14791/70683/52513/66409/68916/17299/67493/234344/66637/215193/50912/228889/68979/73681/56200/71916/52686/56095/69237/208366/28114/66254/67724/12181/106248/67053/53414/57773/72167/240174/57315/67222/59028/18572/72133/69499/18813/16193/66446/73674/57750/27993/67949/66181/98956/271842/69639/68147/70285/66362/74753/230082/230233/69072/69902/67205/740…	130
GO:0043065	positive regulation of apoptotic process	164/3078	474/13456	2.32E-09	1.68E-06	1.42E-06	29816/20302/19411/66143/18104/26403/83945/12122/83383/14465/18011/12567/20656/12048/15903/19165/19211/229595/14991/60533/218772/21939/17865/12261/109689/71361/21664/15468/22433/26399/26941/15251/13665/21809/26919/69635/57748/18753/50523/21807/66854/12177/56274/17869/67731/22337/15370/20112/16004/27279/19252/21926/14815/14102/16452/12333/17283/12015/18569/21416/67590/94275/13198/16193/15510/98267/…	164
GO:0043068	positive regulation of programmed cell death	167/3078	485/13456	2.46E-09	1.68E-06	1.42E-06	29816/20302/19411/66143/18104/26403/83945/12122/83383/14465/18011/12567/20656/12048/15903/19165/19211/229595/14991/60533/218772/21939/17865/12261/109689/71361/21664/15468/22433/26399/26941/15251/13665/21809/20963/26919/69635/57748/18753/50523/21807/66854/12177/56274/17869/67731/22337/15370/20112/16004/27279/19252/21926/14815/14102/16452/12333/17283/12015/18569/21416/67590/94275/13198/16193/15510/…	167
GO:0045785	positive regulation of cell adhesion	122/3078	329/13456	2.84E-09	1.73E-06	1.46E-06	18591/16402/16400/74030/109880/12491/12317/54446/83945/328365/15586/234839/12977/14462/14991/60533/11486/19159/12261/74048/171285/22433/15519/68732/14538/20963/13132/15205/22042/12524/22339/21926/16149/12507/12511/16452/12333/12015/19271/83430/17339/11689/16193/18186/15510/226352/20344/16579/18761/16410/56348/228564/17242/16176/19260/12042/18124/19273/20750/15505/13846/29875/23991/16190/14082/161…	122
GO:0070372	regulation of ERK1 and ERK2 cascade	83/3078	212/13456	6.38E-08	3.49E-05	2.95E-05	18591/20302/101568/109880/12491/16600/56221/232339/19211/215748/109689/20303/13982/14257/171285/22433/217378/26941/14538/20963/13132/26404/27374/22339/83433/12266/19252/24066/16149/13669/64384/16193/12768/18186/11910/18128/114715/12156/16176/18441/19260/18129/24088/384009/93695/23991/76954/75590/319520/216805/21983/20293/20306/20296/27403/20608/101809/19401/20130/101613/18673/63953/107746/56089/1…	83
GO:0070371	ERK1 and ERK2 cascade	87/3078	226/13456	7.66E-08	3.80E-05	3.21E-05	18591/20302/101568/109880/12491/16600/56221/232339/19211/215748/109689/20303/13982/14257/171285/22433/217378/26941/12192/14538/20963/13132/17869/26404/27374/22339/83433/12266/19252/24066/16149/13669/64384/16193/12768/18186/11910/18128/16410/114715/12156/16176/18441/19260/18129/24088/384009/93695/23991/76954/75590/319520/22041/216805/21983/20293/20306/20296/27403/20608/101809/19401/20130/101613/18…	87
GO:0042273	ribosomal large subunit biogenesis	36/3078	69/13456	1.08E-07	4.90E-05	4.14E-05	52530/67223/66942/235036/66409/66596/217011/56095/69237/67832/12181/28126/75619/57750/67949/70285/69072/69902/74035/231452/67920/234549/66164/20935/110109/67239/68083/207932/107071/224619/76130/100019/59014/20826/229937/57741	36
GO:0006220	pyrimidine nucleotide metabolic process	22/3078	34/13456	2.21E-07	9.30E-05	7.86E-05	69719/22271/20425/50773/22247/56520/93685/21915/80914/171567/76654/110074/51797/13178/107569/320685/56749/54369/18102/66422/237336/331487	22
GO:0022409	positive regulation of cell-cell adhesion	76/3078	196/13456	3.57E-07	0.000139289	0.000117703	54446/83945/328365/234839/14462/14991/60533/11486/74048/171285/22433/15519/14538/20963/15205/22042/12524/21926/16149/12507/12511/12333/12015/83430/11689/16193/15510/20344/16579/18761/17242/16176/19260/12042/18124/19273/15505/13846/16190/14082/16186/16168/23871/20443/80859/20296/21950/102657/108723/74256/243910/19401/16456/54215/320404/16173/15284/63953/17684/192656/11987/230979/14924/104709/18793…	76
GO:0045926	negative regulation of growth	73/3078	189/13456	7.19E-07	0.000261867	0.000221286	11482/14025/15982/19015/12576/29869/232339/55942/15586/19280/19211/17756/211652/17268/71701/70834/18208/15251/19645/13132/20356/56274/239667/74116/67155/17283/21416/19271/11302/18186/20353/66262/74117/18128/18129/20351/107869/19063/20348/22791/22241/232334/28019/18479/67378/56437/214523/17127/54369/76500/216805/78926/18854/16526/70925/23886/16468/18673/63953/17684/52808/209212/12696/233805/12569/…	73
GO:0007159	leukocyte cell-cell adhesion	94/3078	261/13456	8.49E-07	0.000290201	0.000245229	16402/16421/16600/54446/83945/15507/328365/14462/14991/60533/11486/74048/20868/171285/22433/19084/18613/11847/15519/20963/15205/208650/22042/12524/21926/65113/16149/12507/12511/12333/12015/83430/11689/16193/15510/20344/18761/17242/57432/16176/94212/19260/12042/18124/15505/13846/93695/16768/16190/14082/17698/16186/12367/16168/54698/23871/20443/23959/80859/20296/21950/102657/108723/74256/243910/194…	94
GO:0050867	positive regulation of cell activation	95/3078	265/13456	9.43E-07	0.000303243	0.00025625	18591/83945/18457/328365/14462/14991/60533/21939/11486/11541/74048/56193/171285/22433/15519/20963/14375/15205/13350/22042/12524/83433/17685/21926/16149/12507/12511/16452/12015/19271/83430/16193/15510/227059/16331/20344/18761/17242/16176/18019/19260/12042/66362/18124/12182/12494/56792/15505/13846/16190/14082/16186/16168/80859/20296/21950/102657/51869/66725/108723/74256/243910/19401/12142/54215/320…	95
GO:0006221	pyrimidine nucleotide biosynthetic process	15/3078	20/13456	1.12E-06	0.000339621	0.000286991	69719/20425/22247/56520/21915/80914/171567/110074/51797/320685/56749/54369/18102/237336/331487	15
GO:1903039	positive regulation of leukocyte cell-cell adhesion	65/3078	166/13456	1.65E-06	0.000474029	0.00040057	54446/83945/328365/14462/14991/60533/11486/74048/171285/22433/15519/20963/15205/22042/12524/21926/16149/12507/12511/12333/12015/83430/11689/16193/15510/20344/18761/17242/16176/19260/12042/18124/15505/13846/16190/14082/16186/16168/23871/20443/80859/20296/21950/102657/108723/74256/243910/19401/54215/320404/16173/15284/63953/192656/11987/230979/104709/78317/12772/20737/723840/17974/12399/12519/381484	65
GO:0022407	regulation of cell-cell adhesion	109/3078	318/13456	1.88E-06	0.00051441	0.000434693	16600/54446/83945/15507/328365/234839/14462/14991/60533/11486/74048/171285/22433/19084/11847/69237/15519/14538/20963/18753/15205/208650/22042/12524/22339/21926/65113/16149/12507/12511/16452/12333/12015/83430/11689/16193/15510/226352/20344/16579/18761/18128/17242/16449/12156/57432/16176/228788/94212/19260/12042/18124/19273/15505/13846/93695/16768/12527/16190/20947/14082/16186/12367/16168/54698/238…	109
GO:0032611	interleukin-1 beta production	34/3078	70/13456	2.09E-06	0.000543186	0.00045901	20302/12491/15507/16956/11847/54483/69146/15975/83433/21926/16452/16193/16176/24088/17127/12363/217203/18854/383619/13653/170744/192656/230738/14367/14062/268857/21899/257632/58991/637515/67705/380839/12774/100040462	34
GO:0060326	cell chemotaxis	76/3078	204/13456	2.19E-06	0.000543649	0.000459401	18591/20302/12317/56221/15507/17295/215999/12977/12261/20303/445007/20963/238871/18753/20356/20583/15370/17250/27226/22339/19252/16149/19271/83430/11689/12768/18186/18761/18128/17242/16176/68328/18578/12986/15234/12182/56792/20750/57349/56744/330122/12769/20947/140571/17524/12927/106512/21983/20293/20306/20296/238130/68667/104099/21825/58218/58217/54199/217835/13609/12767/80901/270152/12772/12766…	76
GO:0009124	nucleoside monophosphate biosynthetic process	18/3078	28/13456	3.30E-06	0.000784016	0.000662519	11717/11565/11486/20425/237823/11564/22247/14450/54391/15452/110639/108147/80914/110074/231327/19139/320685/331487	18
GO:0070374	positive regulation of ERK1 and ERK2 cascade	57/3078	144/13456	4.75E-06	0.00105172	0.000888737	18591/20302/109880/12491/56221/19211/109689/20303/13982/14257/171285/217378/14538/26404/22339/83433/12266/16149/16193/12768/18186/18128/12156/16176/18441/19260/18129/24088/384009/93695/23991/76954/21983/20293/20306/20296/27403/20608/19401/18673/107746/56089/192656/213452/381126/12767/11549/14062/76854/108058/257632/19229/76089/16542/26417/52065/319430	57
GO:0043408	regulation of MAPK cascade	157/3078	500/13456	4.95E-06	0.00105172	0.000888737	18591/20302/101568/109880/12491/16600/26403/56221/19062/232339/17295/19211/114604/215748/216965/21939/69534/211652/109689/20303/13982/17311/73914/14257/171285/22433/26399/217378/26941/70834/21809/14538/20963/93834/18753/13132/56274/26404/27374/22339/83433/77889/12266/19252/21926/24066/16149/14102/17283/26412/13669/94275/19271/64384/16193/12768/18186/12421/20353/11910/14130/22029/18128/215653/1147…	157
GO:0002696	positive regulation of leukocyte activation	89/3078	253/13456	5.00E-06	0.00105172	0.000888737	83945/18457/328365/14462/14991/60533/21939/11486/11541/74048/171285/22433/15519/20963/14375/15205/22042/12524/83433/17685/21926/16149/12507/12511/12015/83430/16193/15510/227059/16331/18761/17242/16176/18019/19260/12042/66362/18124/12182/12494/56792/15505/13846/16190/14082/16186/16168/80859/20296/21950/102657/51869/66725/108723/74256/243910/19401/12142/54215/320404/384783/16173/15284/63953/21825/5…	89
GO:0048514	blood vessel morphogenesis	144/3078	454/13456	6.73E-06	0.001334462	0.001127664	18591/11482/16402/330171/74030/12491/16600/60611/26360/50767/56221/15507/14465/328365/15184/15586/75723/19211/14991/72324/21939/11622/17268/14257/22433/18613/15251/12192/22375/20963/18570/80898/20620/18792/20356/67154/22762/15205/107589/11504/22379/15370/52014/27279/22339/13819/12266/21926/19271/58223/11689/18186/18187/14645/18128/14725/16410/26427/17242/16449/114715/16176/18129/20351/13601/14595…	144
GO:0000470	maturation of LSU-rRNA	18/3078	29/13456	6.84E-06	0.001334462	0.001127664	52530/67223/66942/66409/56095/69237/12181/57750/67949/70285/74035/67920/110109/67239/207932/76130/20826/229937	18
GO:1903037	regulation of leukocyte cell-cell adhesion	83/3078	234/13456	7.18E-06	0.001354217	0.001144357	16600/54446/83945/15507/328365/14462/14991/60533/11486/74048/171285/22433/19084/11847/15519/20963/15205/208650/22042/12524/21926/65113/16149/12507/12511/12333/12015/83430/11689/16193/15510/20344/18761/17242/57432/16176/94212/19260/12042/18124/15505/13846/93695/16768/16190/14082/16186/12367/16168/54698/23871/20443/80859/20296/21950/102657/108723/74256/243910/19401/54215/320404/16173/15284/63953/19…	83
GO:0072528	pyrimidine-containing compound biosynthetic process	15/3078	22/13456	7.63E-06	0.001390477	0.001174998	69719/20425/22247/56520/21915/80914/171567/110074/51797/320685/56749/54369/18102/237336/331487	15
GO:0015849	organic acid transport	70/3078	190/13456	8.48E-06	0.00149445	0.001262859	20540/20509/20514/19015/12491/50799/12298/14081/68267/216227/20503/55963/215335/328059/26399/26941/52466/11847/19300/20963/14057/18753/12934/50934/69906/17869/17250/55951/18037/20522/21926/14815/54393/107375/80879/17339/18173/107508/14725/16176/26570/74152/11520/26970/26357/18479/50790/11666/18408/26457/330836/64008/74205/20501/114229/67452/234595/20608/215113/384783/20539/21825/11987/14609/26874…	70
GO:0006520	cellular amino acid metabolic process	70/3078	191/13456	1.04E-05	0.001766864	0.001493057	18618/107766/20540/67873/22321/14287/11565/18263/69719/104458/244141/50493/20425/104923/237823/108156/11847/217830/22375/110960/70120/14450/246277/109652/107045/70223/104174/56454/209027/108037/76187/23874/50880/226414/14645/107508/56357/26570/229487/71807/107869/109093/51797/15356/107271/231327/67870/665563/27053/353172/14583/12035/66885/67417/110446/14629/434437/20751/68133/210009/102436/54375/…	70
GO:0001819	positive regulation of cytokine production	114/3078	347/13456	1.07E-05	0.001766864	0.001493057	67065/20302/12491/15507/14465/68279/16956/14462/14991/60533/21939/80861/11541/20303/15979/56200/20742/14257/171285/22433/71956/15251/15519/16364/20963/69146/56490/67581/15975/83433/12266/16994/21926/16149/12511/16452/67457/19271/83430/13198/54123/16193/15510/16177/18173/18761/17242/16176/228788/19260/24088/12042/18124/18578/15234/56744/27056/23845/56619/21937/16190/14082/16168/54698/54725/214763/…	114
GO:0006954	inflammatory response	155/3078	499/13456	1.10E-05	0.001771828	0.001497252	12029/17312/20302/27060/19015/19698/15162/15937/14792/56221/15184/15586/19165/12977/16956/14462/67759/109934/21939/11486/11541/12514/20303/19216/13982/171285/15251/73086/20963/17079/19645/54483/69146/57781/67581/17250/27226/83433/12266/21926/65113/12511/16889/16452/18569/56715/83430/11689/16193/12768/15510/16177/16178/18173/20344/14130/18761/18128/241447/16410/17242/20619/12156/16176/14013/18129/…	155
GO:0001525	angiogenesis	123/3078	381/13456	1.25E-05	0.001864553	0.001575607	11482/16402/330171/12491/16600/60611/26360/50767/56221/15507/14465/15184/15586/75723/19211/14991/72324/21939/11622/17268/14257/22433/18613/15251/22375/20963/18570/80898/20620/18792/20356/67154/11504/22379/15370/52014/27279/22339/13819/12266/21926/58223/11689/18186/18187/14645/18128/16410/26427/17242/114715/16176/18129/20351/13601/14595/30924/18710/21349/15234/56744/11745/19303/13846/21937/23991/1…	123
GO:0042110	T cell activation	123/3078	381/13456	1.25E-05	0.001864553	0.001575607	14025/27060/109880/19698/83945/15507/58206/328365/19165/14462/14991/60533/11486/74048/94176/171285/22433/58240/19084/14226/11847/12192/15519/16364/20963/13039/18826/15205/208650/22042/12524/15975/65113/16149/12507/12511/14102/12015/93685/83430/12476/16193/15510/18173/18761/16410/17242/57432/16176/94212/19260/20351/12042/51797/12769/15505/13846/93695/16768/56619/26888/16797/16190/14082/56501/54644…	123
GO:0050870	positive regulation of T cell activation	57/3078	148/13456	1.26E-05	0.001864553	0.001575607	83945/328365/14462/14991/60533/11486/74048/171285/22433/15519/20963/15205/22042/12524/16149/12507/12511/12015/83430/16193/15510/18761/17242/16176/19260/12042/15505/13846/16190/14082/16186/16168/80859/20296/21950/102657/108723/74256/243910/19401/54215/320404/16173/15284/63953/192656/11987/230979/104709/78317/12772/20737/723840/17974/12399/12519/381484	57
GO:0043491	protein kinase B signaling	58/3078	152/13456	1.47E-05	0.002120269	0.001791696	16600/19062/17295/19211/17289/14462/14991/21939/12261/237542/26941/12192/15519/14538/18570/20356/67154/56274/22339/21926/58988/21416/19271/13198/16193/14725/16176/23897/75778/18710/23991/75747/74769/216805/74392/21983/20293/242248/234515/19401/12985/20130/23886/18673/16173/107746/13138/21825/56089/17537/98432/329828/76854/16367/16413/16542/211323/52065	58
GO:0022604	regulation of cell morphogenesis	92/3078	270/13456	1.52E-05	0.002133066	0.00180251	14673/14025/20302/17454/109880/15162/12317/23790/56221/74202/17295/67220/74194/12261/69288/20393/67884/26941/70834/13385/68732/15212/13132/11838/22379/207214/22339/240058/13823/24066/71972/67287/14163/108100/16193/18186/74117/18845/99152/17242/18441/20351/16975/11426/23912/19303/19415/18844/23991/71960/17698/56364/140571/12927/26901/14457/110253/19268/382018/67938/13631/20293/20296/171171/71409/1…	92
GO:0009218	pyrimidine ribonucleotide metabolic process	15/3078	23/13456	1.73E-05	0.002362567	0.001996446	69719/22271/50773/22247/56520/93685/80914/171567/76654/51797/107569/56749/54369/18102/331487	15
GO:0050865	regulation of cell activation	141/3078	451/13456	1.90E-05	0.002538942	0.002145488	18591/109880/83945/15507/18457/328365/17289/14462/14991/60533/109934/21939/11486/11541/11622/74048/56193/171285/22433/19084/11847/12192/15519/20963/18753/14375/15205/13350/208650/22042/67742/12524/235587/83433/17685/21926/65113/16149/12507/12511/14102/16452/12015/19271/56715/83430/16193/15510/227059/16331/20344/14130/18761/17242/57432/16176/94212/18019/19260/12042/66362/18124/12182/12494/21682/56…	141
GO:0010810	regulation of cell-substrate adhesion	60/3078	162/13456	3.03E-05	0.003840311	0.003245188	18591/11482/16402/16400/74030/109880/12491/12317/23790/19211/12977/12261/68732/14538/18792/13132/22339/24066/16452/17283/19271/18186/226352/18128/56348/17242/16449/19262/11426/12182/20750/29875/23991/12554/12927/17127/74769/110253/13612/22417/18081/20130/68750/13138/21825/12571/108911/14260/68813/17381/14366/12043/330662/192197/19229/16413/16542/30963/105352/244895	60
GO:0045765	regulation of angiogenesis	75/3078	214/13456	3.11E-05	0.003840311	0.003245188	11482/16402/12491/16600/60611/56221/15507/14465/15586/14991/21939/22433/15251/22375/18570/80898/20620/20356/67154/11504/27279/22339/12266/21926/11689/18186/14645/26427/17242/114715/16176/20351/13601/30924/15234/56744/11745/19303/21937/18576/20866/112405/23871/74769/216805/19274/56299/240185/20296/13197/12226/18854/226841/54215/20130/21825/236511/257630/230738/15901/54601/12767/104709/320924/12772…	75
GO:1903825	organic acid transmembrane transport	39/3078	93/13456	3.16E-05	0.003840311	0.003245188	20540/20509/20514/12491/50799/14081/68267/216227/20503/55963/215335/328059/52466/19300/14057/18753/50934/69906/17869/17250/55951/20522/21926/80879/14725/26570/74152/11666/18408/26457/330836/20501/234595/215113/384783/20539/21825/11987/26874	39
GO:1905039	carboxylic acid transmembrane transport	39/3078	93/13456	3.16E-05	0.003840311	0.003245188	20540/20509/20514/12491/50799/14081/68267/216227/20503/55963/215335/328059/52466/19300/14057/18753/50934/69906/17869/17250/55951/20522/21926/80879/14725/26570/74152/11666/18408/26457/330836/20501/234595/215113/384783/20539/21825/11987/26874	39
GO:1901342	regulation of vasculature development	76/3078	218/13456	3.40E-05	0.003942411	0.003331465	11482/16402/12491/16600/60611/56221/15507/14465/15586/14991/21939/22433/15251/22375/18570/80898/20620/20356/67154/11504/27279/22339/12266/21926/11689/18186/14645/26427/17242/114715/16176/20351/13601/30924/15234/56744/11745/19303/21937/18576/20866/112405/23871/74769/216805/19274/56299/240185/20296/13197/12226/22417/18854/226841/54215/20130/21825/236511/257630/230738/15901/54601/12767/104709/320924…	76
GO:0032612	interleukin-1 production	37/3078	87/13456	3.46E-05	0.003942411	0.003331465	20302/12491/15507/16956/171285/11847/54483/69146/15975/83433/21926/16452/16193/16178/16176/24088/17127/12363/217203/18854/383619/13653/170744/192656/20196/230738/14367/14062/268857/21899/257632/58991/637515/67705/380839/12774/100040462	37
GO:0050679	positive regulation of epithelial cell proliferation	53/3078	139/13456	3.46E-05	0.003942411	0.003331465	12444/18591/11482/56221/15586/11541/13982/14257/22433/18570/20356/17869/15370/22339/21926/69745/12015/21416/16193/14645/18128/14178/17242/12156/18129/13601/18124/14595/16438/140571/12554/12530/22346/240185/20296/54375/226841/18102/68750/16173/75605/15901/270152/17381/257632/15364/16542/58991/12168/12443/11727/319430/353310	53
GO:0009156	ribonucleoside monophosphate biosynthetic process	15/3078	24/13456	3.63E-05	0.004053989	0.003425752	11717/11565/11486/237823/11564/22247/14450/54391/15452/110639/108147/80914/231327/19139/331487	15
GO:0051251	positive regulation of lymphocyte activation	75/3078	215/13456	3.73E-05	0.004073163	0.003441955	83945/18457/328365/14462/14991/60533/21939/11486/74048/171285/22433/15519/20963/14375/15205/22042/12524/17685/16149/12507/12511/12015/83430/16193/15510/227059/16331/18761/17242/16176/18019/19260/12042/66362/12182/12494/15505/13846/16190/14082/16186/16168/80859/20296/21950/102657/51869/108723/74256/243910/19401/12142/54215/320404/384783/16173/15284/63953/58194/192656/11987/230979/104709/78317/1277…	75
GO:0060445	branching involved in salivary gland morphogenesis	12/3078	17/13456	3.85E-05	0.004123144	0.003484191	18591/17295/20583/21926/16193/18186/14178/20348/15234/18844/21817/13138	12
GO:0032651	regulation of interleukin-1 beta production	29/3078	63/13456	4.16E-05	0.004374126	0.003696279	20302/15507/16956/11847/54483/69146/15975/83433/21926/16452/16193/24088/17127/12363/18854/383619/13653/170744/192656/230738/14367/14062/268857/257632/58991/67705/380839/12774/100040462	29
GO:0032103	positive regulation of response to external stimulus	99/3078	302/13456	4.37E-05	0.004505252	0.003807085	18591/67065/20302/109880/12317/56221/15507/17295/215999/12977/16956/14991/80861/12261/11541/20303/171285/14226/15519/17079/20356/14375/20583/80285/17250/27226/22339/83433/12266/21926/16149/16452/18569/71398/19271/83430/54123/16193/12768/18186/15510/22596/227738/17242/16176/24088/56792/16768/21937/20947/14082/12554/54698/23871/54725/214763/22038/17127/106512/21983/80859/20296/66725/21817/383619/54…	99
GO:0002683	negative regulation of immune system process	97/3078	295/13456	4.55E-05	0.004606151	0.003892347	83945/15507/17289/14991/60533/69376/109934/11486/80861/12261/12514/17311/74048/73914/171285/19084/74136/11847/21809/17869/208650/57781/67742/12524/235587/66058/19252/15526/21926/65113/16149/107321/14102/107173/19271/56715/12768/16331/14130/17242/57432/94212/19260/229615/56792/93695/16768/93694/16190/14082/14605/12367/54698/211770/11920/20293/102657/74256/243910/18102/242248/234515/19401/12142/213…	97
GO:0009147	pyrimidine nucleoside triphosphate metabolic process	11/3078	15/13456	4.74E-05	0.004651003	0.003930249	69719/56520/93685/21915/171567/110074/51797/54369/18102/66422/237336	11
GO:0043410	positive regulation of MAPK cascade	113/3078	354/13456	4.77E-05	0.004651003	0.003930249	18591/20302/109880/12491/26403/56221/17295/19211/216965/21939/69534/211652/109689/20303/13982/17311/14257/171285/26399/217378/70834/21809/14538/20963/93834/18753/13132/56274/26404/22339/83433/12266/21926/16149/26412/94275/19271/16193/12768/18186/12421/20353/14130/22029/18128/215653/12156/16176/18441/19260/18129/24088/29815/384009/15234/19303/93695/29875/23991/18479/76954/22041/26398/240185/217203…	113
GO:0000469	cleavage involved in rRNA processing	16/3078	27/13456	5.07E-05	0.004862675	0.004109119	52530/67619/50912/208366/12181/59028/66446/69639/66362/74035/213895/215194/104662/227715/213773/59014	16
GO:0002694	regulation of leukocyte activation	130/3078	418/13456	5.21E-05	0.004905502	0.004145309	109880/83945/15507/18457/328365/17289/14462/14991/60533/109934/21939/11486/11541/11622/74048/171285/22433/19084/11847/12192/15519/20963/14375/15205/208650/22042/67742/12524/235587/83433/17685/21926/65113/16149/12507/12511/14102/12015/56715/83430/16193/15510/227059/16331/14130/18761/17242/57432/16176/94212/18019/19260/12042/66362/18124/12182/12494/56792/15505/13846/93695/16768/28040/16797/16190/14…	130
GO:0009123	nucleoside monophosphate metabolic process	24/3078	49/13456	5.47E-05	0.004936306	0.004171339	11717/11565/11486/22271/20425/50773/237823/11564/22247/14450/54391/15452/110639/108147/80914/76654/110074/231327/107569/19139/320685/23959/381101/331487	24
GO:1990830	cellular response to leukemia inhibitory factor	47/3078	121/13456	5.50E-05	0.004936306	0.004171339	19411/66143/16600/20810/12301/12298/17865/22433/20425/28071/56421/19300/20972/22042/55951/225027/24066/104174/15201/18187/22596/171567/69482/80877/107869/20750/231452/69106/14872/27395/72170/51869/18854/54342/71982/16468/13619/75605/14366/53625/12702/104263/232087/19245/387167/74682/791070	47
GO:0009220	pyrimidine ribonucleotide biosynthetic process	10/3078	13/13456	5.53E-05	0.004936306	0.004171339	69719/22247/56520/80914/171567/51797/56749/54369/18102/331487	10
GO:0022612	gland morphogenesis	39/3078	95/13456	5.60E-05	0.004936306	0.004171339	18591/19411/56711/18505/17295/104156/12977/18612/13982/22433/26941/18208/18792/22337/20583/21926/14815/12333/12234/16193/18186/18128/14178/17242/18129/14595/20348/15234/18844/16438/17698/22417/18854/21817/16173/13138/75605/12608/12043	39
GO:0032609	interferon-gamma production	37/3078	89/13456	6.25E-05	0.005418384	0.00457871	27060/14462/14991/60533/12261/74048/171285/15975/21926/83430/13198/15510/16177/18173/16176/19260/18578/14082/54698/13813/21950/102657/19401/54215/16173/20539/170744/192656/230738/14367/12772/243655/12475/20737/12051/257632/12399	37
GO:0006760	folic acid-containing compound metabolic process	13/3078	20/13456	6.80E-05	0.005809726	0.004909407	14287/216188/20425/108156/13361/14450/108037/108147/665563/210009/14528/270685/100039707	13
GO:1990823	response to leukemia inhibitory factor	47/3078	122/13456	6.98E-05	0.005869491	0.00495991	19411/66143/16600/20810/12301/12298/17865/22433/20425/28071/56421/19300/20972/22042/55951/225027/24066/104174/15201/18187/22596/171567/69482/80877/107869/20750/231452/69106/14872/27395/72170/51869/18854/54342/71982/16468/13619/75605/14366/53625/12702/104263/232087/19245/387167/74682/791070	47
GO:0070542	response to fatty acid	15/3078	25/13456	7.16E-05	0.00593321	0.005013755	12491/19385/12567/15903/16956/30049/20250/24088/67800/236900/20249/230738/56458/329065/16367	15
GO:0006399	tRNA metabolic process	58/3078	160/13456	8.21E-05	0.006569111	0.005551112	212528/60507/108943/68916/17299/22321/66637/104458/244141/73681/71916/52686/22375/208366/28114/110960/67724/106248/70120/67053/57773/72167/240174/107045/70223/72133/23874/226414/107508/98956/66044/229487/71807/109093/74753/230233/107271/56361/353172/67417/233802/102436/66078/66926/105148/381802/52575/212679/320816/66965/227522/433813/100929/78697/69606/328162/100087/212728	58
GO:0030593	neutrophil chemotaxis	30/3078	68/13456	8.25E-05	0.006569111	0.005551112	20302/56221/215999/12261/20303/20963/238871/16149/83430/17242/16176/18578/12986/12182/20750/57349/56744/330122/17524/20293/20306/20296/104099/58218/58217/270152/257632/20201/14131/319430	30
GO:0048640	negative regulation of developmental growth	37/3078	90/13456	8.29E-05	0.006569111	0.005551112	14025/15982/12576/29869/232339/19280/19211/17756/211652/17268/70834/18208/20356/56274/239667/74116/17283/21416/11302/18186/20353/74117/20351/20348/22241/232334/18479/67378/16526/23886/16468/63953/17684/12569/14609/14297/12774	37
GO:0046631	alpha-beta T cell activation	50/3078	133/13456	8.68E-05	0.006780733	0.005729939	27060/109880/19698/14462/14991/60533/11486/74048/94176/11847/16364/20963/13039/208650/93685/83430/16193/18761/19260/20351/15505/26888/16190/56501/54644/16186/16168/54698/13813/80859/243910/19401/12142/54215/320404/16173/15284/192656/230979/230738/12772/20737/12051/245126/12608/12043/723840/12399/12519/14728	50
GO:1990266	neutrophil migration	35/3078	84/13456	9.24E-05	0.007114055	0.006011608	20302/56221/215999/68279/12261/20303/18613/20963/238871/16149/83430/16177/17242/16176/18578/12986/12182/20750/57349/56744/330122/17524/20293/20306/20296/104099/58218/58217/270152/68891/257632/20201/14131/56212/319430	35
GO:0010634	positive regulation of epithelial cell migration	46/3078	120/13456	9.54E-05	0.007244368	0.006121726	18591/16400/74030/12317/15507/17295/15586/75723/14462/21939/18643/11541/14257/15251/18570/20620/12339/20356/20583/52014/22339/212307/18186/226352/14178/384009/11745/23991/15185/12927/23871/74769/240185/234779/20130/68750/21825/230738/68813/320924/330662/192197/19229/16413/16542/12168	46
GO:0045596	negative regulation of cell differentiation	148/3078	493/13456	0.000112902	0.008453757	0.007143699	18591/11482/14025/19411/15982/19015/73389/60611/12317/23790/29869/15507/24068/20656/232339/15903/15184/19280/19211/17756/14462/66999/14991/218772/11622/17268/22433/76566/70834/18208/12192/19645/20356/22762/17869/15205/20583/239667/27374/66058/22339/74116/77889/50766/15526/21926/24066/52662/16149/28000/14102/17283/107173/18569/21416/11302/13198/18186/20353/16331/74117/329278/18128/16410/17242/1644…	148
GO:0031589	cell-substrate adhesion	85/3078	258/13456	0.000121292	0.008959183	0.007570801	18591/11482/16402/16421/16400/74030/19015/109880/12491/12317/53867/23790/12032/19211/17289/12977/109711/12261/18613/68732/14538/18792/13132/27279/22339/24066/107321/16452/17283/20411/19271/18186/226352/226519/16780/329278/18128/16410/56348/17242/16449/19262/12125/14595/30924/11426/22319/12182/20750/19303/29875/23991/12554/12927/17127/74769/110253/81877/69538/230661/13612/171171/22417/17130/18081/…	85
GO:0051896	regulation of protein kinase B signaling	48/3078	128/13456	0.000127819	0.009315472	0.007871876	16600/19062/17295/19211/14462/14991/12261/237542/26941/15519/14538/18570/20356/67154/56274/22339/21926/21416/19271/13198/16193/14725/23897/23991/75747/74769/216805/74392/21983/242248/234515/19401/12985/20130/23886/18673/16173/107746/13138/21825/56089/17537/98432/329828/76854/16413/211323/52065	48
GO:0032649	regulation of interferon-gamma production	33/3078	79/13456	0.000136816	0.009839954	0.00831508	14462/14991/60533/12261/74048/171285/15975/21926/83430/13198/15510/16177/18173/16176/19260/18578/14082/54698/21950/102657/19401/54215/16173/20539/170744/192656/230738/14367/12772/243655/12475/12051/257632	33
GO:0071706	tumor necrosis factor superfamily cytokine production	52/3078	142/13456	0.000139157	0.009878316	0.008347497	20302/12491/15507/19165/16956/60533/20303/15979/74048/73914/171285/11847/20963/56490/67581/83433/16452/67457/19271/83430/16193/15510/19260/24088/56744/93695/26888/21937/14082/217305/217203/20296/66725/19401/16173/21825/230073/192656/257630/230738/14367/12772/268857/12475/20737/21899/12051/257632/14131/58991/319430/12774	52
